# Supplementary material for: Traditional Knowledge of Plants for Sunggau Rafters on Three Forest Types for Conservation of Apis dorsata in Indonesia
Source: MDPI journal article supplement (doi:10.3390/f15040657), 2024-04-04
Supplement: s1 [file s1]

Archive with 3 entries (3 files):
- 2. Informed concent_beefarmers_respondents.pdf
- 3. Questionnaire_interview_beefarmers.pdf
- Supplementary Tables.pdf
