# Supplementary material for: Traditional Knowledge of Plants for Sunggau Rafters on Three Forest Types for Conservation of Apis dorsata in Indonesia
Source: MDPI journal article supplement (doi:10.3390/f15040657), 2024-04-04
Supplement: s1 [file s1]

## Traditional Knowledge of Plants for *Sunggau* Rafters on Three Forest Types for Conservation of *Apis dorsata* in Indonesia

Suci Dian Hayati<sup>1</sup>, Ibnul Qayim<sup>2</sup>, Rika Raffiudin<sup>2</sup>, Nunik Sri Ariyanti<sup>2\*</sup>, Windra Priawandiputra<sup>2</sup>, Miftahudin Miftahudin<sup>2</sup>

Questionnaire used for interviewing respondents.

| A. Respondent identity ( <i>Identitas Responden</i> ) |                                                                         |   |                                                                                        |
|-------------------------------------------------------|-------------------------------------------------------------------------|---|----------------------------------------------------------------------------------------|
| 1.                                                    | Name<br><i>Nama</i>                                                     | : |                                                                                        |
| 2.                                                    | Gender<br><i>Jenis Kelamin</i>                                          | : | Male / Female<br><i>(Pria / perempuan)</i>                                             |
| 3.                                                    | Age<br><i>Usia</i>                                                      | : |                                                                                        |
| 4.                                                    | Address<br><i>Alamat</i>                                                | : |                                                                                        |
| 5.                                                    | Main job<br><i>Pekerjaan</i>                                            | : |                                                                                        |
| 6.                                                    | Contact number<br><i>No Telepon</i>                                     | : |                                                                                        |
| 7.                                                    | Highest level of education<br><i>Pendidikan terakhir</i>                | : |                                                                                        |
| 8.                                                    | Local Citizens<br><i>Asal daerah</i>                                    | : | Native / immigrants<br><i>Penduduk asli / pendatang</i>                                |
| 9.                                                    | Ethnic<br><i>Suku</i>                                                   | : |                                                                                        |
| 10.                                                   | Role in <i>sunggau</i> tradition<br><i>Status dalam tradisi sunggau</i> | : | Bee farmers/ smokers/ bee trees owner<br><i>Petani lebah/ pengasap/ pemilik sambit</i> |

| B. Knowledge of <i>sunggau</i> ( <i>pengetahuan tentang sunggau</i> ) |                                                                                                                        |   |  |
|-----------------------------------------------------------------------|------------------------------------------------------------------------------------------------------------------------|---|--|
| 1.                                                                    | When did you first get acquainted with <i>sunggau</i> ?<br><i>Usia berapa mengenal sunggau?</i>                        | : |  |
| 2.                                                                    | How old did you start to learn the <i>sunggau</i> construction?<br><i>Usia berapa mulai belajar membangun sunggau?</i> | : |  |

|    |                                                                                                                                    |   |  |
|----|------------------------------------------------------------------------------------------------------------------------------------|---|--|
| 3. | Who taught you to do the sunggau construction?<br><i>Dari siapa anda belajar membangun sunggau?</i>                                | : |  |
| 4. | What kind of <i>sunggau</i> did you build?<br>Apa saja tipe <i>sunggau</i> yang Anda pernah bangun?                                | : |  |
| 5. | Where do you build the sunggau?<br><i>Dimana saja Anda membangun sunggau?</i>                                                      | : |  |
| 6. | How do you determine the location to build <i>sunggau</i> ?<br><i>Bagaimana Anda menentukan lokasi untuk membangun sunggau?</i>    | : |  |
| 7. | Are there additional requirements for <i>Sunggau</i> construction?<br><i>Apakah ada persyaratan khusus saat membangun sunggau?</i> | : |  |

**C. Various of plant species used as *sunggau* (*jenis tumbuhan penopang sunggau*)**

|    |                                                                                                                                                                               |   |  |
|----|-------------------------------------------------------------------------------------------------------------------------------------------------------------------------------|---|--|
| 1. | What species of plant do you use and prefer to construct the <i>sunggau</i> ?<br><i>Apa saja spesies tumbuhan yang pernah digunakan dan disukai untuk membangun sunggau?</i>  | : |  |
| 2. | Where do you find those plants for <i>sunggau</i> ?<br><i>Dimana saja Anda mencari spesies tumbuhan untuk menopang sunggau?</i>                                               | : |  |
| 3. | What are the criteria for choosing the plants to construct the <i>sunggau</i> ?<br><i>Apa saja kriteria/alasan pemilihan spesies tumbuhan penopang sunggau?</i>               | : |  |
| 4. | Are those plants still abundant / easy to find?<br><i>Apakah jenis tumbuhan tersebut masih mudah ditemukan/melimpah?</i>                                                      | : |  |
| 5. | Are there any species that are becoming scarce? What is (are) the reason(s)?<br><i>Apakah ada spesies tumbuhan penopang sunggau yang mulai sulit dijumpai? apa alasannya?</i> | : |  |

**D. Harvesting Honey (*panen madu*)**

|     |                                                                                                                                                                                       |   |  |
|-----|---------------------------------------------------------------------------------------------------------------------------------------------------------------------------------------|---|--|
| 1.  | Do you collect your own <i>sunggau</i> honey?<br><i>Apakah Anda memanen sendiri madu dari sunggau?</i>                                                                                | : |  |
| 2.  | How many times in a year does the honey harvested ?<br><i>Berapa kali madu di sunggau dapat dipanen?</i>                                                                              | : |  |
| 3.  | How is honey harvested? Did you remove the whole hive or just the honeycomb?<br><i>Bagaimana anda memanen madu? Apakah dengan memotong seluruh sarang atau menyunat kantong madu?</i> | : |  |
| 4.  | What species of plants are used for the bee colony smokers?<br><i>Apakah saja spesies tumbuhan yang digunakan sebagai bahan pengasapan?</i>                                           | : |  |
| 5.  | Where do you find those plants? Are they still abundant?<br><i>Dimana saja anda menemukan tumbuhan untuk pengasapan? Apakah jumlahnya masih melimpah?</i>                             | : |  |
| 6.  | Who taught you how to collect honey and to smoke the hive?<br><i>Dari siapa anda belajar memanen madu dan melakukan pengasapan?</i>                                                   | : |  |
| 7.  | How much honey is produced in a single harvest?<br><i>Berapa banyak madu yang dihasilkan dalam sekali panen?</i>                                                                      | : |  |
| 8.  | How do you divide the harvested honey?<br><i>Bagaimana anda membagi hasil panen madu?</i>                                                                                             | : |  |
| 9.  | Where do you sell the honey? How much does it cost?<br><i>Kemana anda menjual madu yang dipanen? Berapa harganya?</i>                                                                 | : |  |
| 10. | Is honey sales profitable?<br><i>Apakah menjual madu menguntungkan?</i>                                                                                                               | : |  |

#### E. Conservation of *sunggau* (*konservasi sunggau*)

|    |                                                                                                            |   |  |
|----|------------------------------------------------------------------------------------------------------------|---|--|
| 1. | Is there any predator that attack the <i>sunggau</i> or colonies?<br><i>Apakah ada predator yang kerap</i> | : |  |
|----|------------------------------------------------------------------------------------------------------------|---|--|

|    |                                                                                                                                                            |   |  |
|----|------------------------------------------------------------------------------------------------------------------------------------------------------------|---|--|
|    | <i>menyerang sunggau atau koloni?</i>                                                                                                                      |   |  |
| 2. | What actions can be taken to protect the <i>sunggau</i> and the bees?<br><i>Apa yang bisa dilakukan untuk melestarikan sunggau dan lebah Apis dorsata?</i> | : |  |
| 3. | What are the challenges that beekeepers in Membalong face today?<br><i>Apa saja tantangan yang dihadapi petani lebah di Membalong saat ini?</i>            | : |  |
