# Supplementary material for: Traditional Knowledge of Plants for Sunggau Rafters on Three Forest Types for Conservation of Apis dorsata in Indonesia
Source: MDPI journal article supplement (doi:10.3390/f15040657), 2024-04-04
Supplement: s1 [file s1]

## Supplementary Materials

**Table S1.** Distribution profile of *sunggau* bee farmers respondent.

| Criteria of Profiles               | Number of Respondent |
|------------------------------------|----------------------|
| Village                            |                      |
| Perpat                             | 11                   |
| Tanjung Rusa                       | 14                   |
| Kembiri                            | 12                   |
| Main economic activities           |                      |
| Agriculture                        | 29                   |
| Formal employment                  | 7                    |
| Laborer                            | 1                    |
| Fisherman                          | 1                    |
| Source of <i>sunggau</i> knowledge |                      |
| Father                             | 28                   |
| Other bee farmers                  | 3                    |
| Both: father and other bee farmers | 7                    |

**Table S2.** Data source for the vegetation analysis in three type of forests in Perpat, Kembiri, Tanjung Rusa in Belitung Island and Kampak Island.

| Forest Types       | Village                         | Data Source   |
|--------------------|---------------------------------|---------------|
| Heath forest       | Perpat                          | [1]           |
|                    | Tanjung Rusa in Belitung Island | [2]           |
|                    | Tanjung Rusa in Kampak Island   |               |
| Swamp heath forest | Perpat                          | current study |
|                    | Kembiri                         | [1]           |
|                    | Tanjung Rusa in Belitung Island | [2]           |
| Mangrove forest    | Perpat                          | current study |
|                    | Kembiri                         | current study |
|                    | Tanjung Rusa in Kampak Island   | [2]           |

**Table S3.** Distribution of *sunggau* types (village, coordinate) and plant species used for *sunggau* in three types of forest. SG = *sunggau*, Per = Perpat, Kem = Kembiri, TR-Bel = Tanjung Rusa - Belitung Island, TR-Kam = Tanjung Rusa - Kampak Island, HF = heath forest, SHF = swamp heath forest, MF = mangrove forest.

| No | Code of <i>sunggau</i> | Village | Coordinates                     | Type of Forest | Types of <i>sunggau</i> | Plank          |                               |                   | Front poles             |                                                                   |                                 | Back poles                  |                                                                  |                                      |
|----|------------------------|---------|---------------------------------|----------------|-------------------------|----------------|-------------------------------|-------------------|-------------------------|-------------------------------------------------------------------|---------------------------------|-----------------------------|------------------------------------------------------------------|--------------------------------------|
|    |                        |         |                                 |                |                         | Family         | Scientific name               | Local name        | Family                  | Scientific name                                                   | Local name                      | Family                      | Scientific name                                                  | Local name                           |
| 1  | SG_Kem_14              | Kem     | 3°03'28.8"S<br>107°49'45.0"E    | SHF            | <i>Ungad</i>            | Phyllanthaceae | <i>Aporosa frutescens</i>     | <i>Pelangas</i>   | Myrtaceae               | <i>Syzygium acuminatissima</i>                                    | <i>Cingkang</i>                 | Myrtaceae                   | <i>Syzygium acuminatissima</i>                                   | <i>Cingkang</i>                      |
| 2  | SG_Kem_1               | Kem     | 3°4' 3.8" S<br>107°48' 42.6" E  | SHF            | <i>Tunggak Muke</i>     | Phyllanthaceae | <i>Aporosa frutescens</i>     | <i>Pelangas</i>   | Dilleniaceae            | <i>Dillenia suffruticosa</i>                                      | <i>Simpur</i>                   | Myrtaceae                   | <i>Syzygium acuminatissima</i>                                   | <i>Cingkang</i>                      |
| 3  | SG_Kem_8               | Kem     | 3°3' 38.5" S<br>107°50' 0.4" E  | SHF            | <i>Bantaian</i>         | Hypericaceae   | <i>Cratoxylum glaucum</i>     | <i>Gerunggang</i> | Myrtaceae               | <i>Melaleuca cajuputi</i>                                         | <i>Gelam</i>                    | Myrtaceae                   | <i>Melaleuca cajuputi</i>                                        | <i>Gelam</i>                         |
| 4  | SG_Kem_18              | Kem     | 3°03'27.1" S<br>107°49'42.9" E  | SHF            | <i>Ungad</i>            | Hypericaceae   | <i>Cratoxylum glaucum</i>     | <i>Gerunggang</i> | Dilleniaceae, Myrtaceae | <i>Dillenia suffruticosa</i> ,<br><i>Melaleuca cajuputi</i>       | <i>Simpur, Gelam</i>            | Myrtaceae                   | <i>Melaleuca cajuputi</i>                                        | <i>Gelam</i>                         |
| 5  | SG_Kem_19              | Kem     | 3°03'26.8"S<br>107°49'42.1"E    | SHF            | <i>Ungad</i>            | Calophyllaceae | <i>Calophyllum soulattri</i>  | <i>Malong</i>     | Dilleniaceae            | <i>Dillenia suffruticosa</i>                                      | <i>Simpur</i>                   | Melastomaceae, Dilleniaceae | <i>Melastoma malabathricum</i> ,<br><i>Dillenia suffruticosa</i> | <i>Keletakan</i> ,<br><i>Simpur</i>  |
| 6  | SG_Kem_16              | Kem     | 3°03'30.8"S<br>107°49'42.4"E    | SHF            | <i>Ungad</i>            | Myrtaceae      | <i>Syzygium palembanicum</i>  | <i>Melukan</i>    | Arecaceae, Dilleniaceae | <i>Daemonorops angustifolia</i> ,<br><i>Dillenia suffruticosa</i> | <i>Rotan</i> ,<br><i>Simpur</i> | Vitaceae                    | <i>Leea aculeata</i>                                             | <i>Malih</i>                         |
| 7  | SG_Kem_17              | Kem     | 3°03'29.2"S<br>107°49'41.8"E    | SHF            | <i>Bantaian</i>         | Myrtaceae      | <i>Syzygium palembanicum</i>  | <i>Melukan</i>    | Myrtaceae               | <i>Melaleuca cajuputi</i>                                         | <i>Gelam</i>                    | Clusiaceae                  | <i>Garcinia bancana</i>                                          | <i>Melak</i>                         |
| 8  | SG_Kem_20              | Kem     | 3°03'28.1"S<br>107°49'44.3"E    | SHF            | <i>Bantaian</i>         | Clusiaceae     | <i>Garcinia bancana</i>       | <i>Melak</i>      | Proteaceae              | <i>Helicia robusta</i>                                            | <i>Mengkikir</i>                | Clusiaceae                  | <i>Garcinia bancana</i>                                          | <i>Melak</i>                         |
| 9  | SG_Kem_4               | Kem     | 3°3' 26.1" S<br>107°49' 44.9" E | SHF            | <i>Ungad</i>            | Phyllanthaceae | <i>Aporosa frutescens</i>     | <i>Pelangas</i>   | Dilleniaceae            | <i>Dillenia suffruticosa</i>                                      | <i>Simpur</i>                   | Aquifoliaceae, Myrtaceae    | <i>Ilex cymosa</i> ,<br><i>Rhodamnia cinerea</i>                 | <i>Mensirak</i> ,<br><i>Jemang</i>   |
| 10 | SG_Kem_5               | Kem     | 3°3' 26.1" S<br>107°49' 45.1" E | SHF            | <i>Ungad</i>            | Anacardiaceae  | <i>Buchanania arborescens</i> | <i>Pao</i>        | Myrtaceae               | <i>Syzygium acuminatissima</i>                                    | <i>Cingkang</i>                 | Lecythidaceae               | <i>Barringtonia reticulata</i>                                   | <i>Putat</i>                         |
| 11 | SG_Kem_12              | Kem     | 3°3' 32.2" S<br>107°49' 52.2" E | SHF            | <i>Ungad</i>            | Lauraceae      | <i>Cryptocarya sp.</i>        | <i>Medang</i>     | Dilleniaceae            | <i>Dillenia suffruticosa</i>                                      | <i>Simpur</i>                   | Rutaceae                    | <i>Melicope denhamii</i>                                         | <i>Sengulang</i>                     |
| 12 | SG_Kem_7               | Kem     | 3°03'25.6"S<br>107°49'45.5" E   | SHF            | <i>Ungad</i>            | Hypericaceae   | <i>Cratoxylum glaucum</i>     | <i>Gerunggang</i> | Myrtaceae               | <i>Melaleuca cajuputi</i>                                         | <i>Gelam</i>                    | Dilleniaceae                | <i>Dillenia suffruticosa</i>                                     | <i>Simpur</i>                        |
| 13 | SG_Kem_11              | Kem     | 3°3' 43.3" S<br>107°50' 13.0" E | SHF            | <i>Tunggak Muke</i>     | Myrtaceae      | <i>Syzygium urceolatum</i>    | <i>Samak</i>      | Lauraceae               | <i>Cryptocarya sp.</i>                                            | <i>Medang</i>                   | Dilleniaceae                | <i>Dillenia suffruticosa</i>                                     | <i>Simpur</i>                        |
| 14 | SG_Kem_13              | Kem     | 3°03'43.0"S<br>107°50'10.9"E    | SHF            | <i>Tunggak Muke</i>     | Lauraceae      | <i>Cryptocarya sp.</i>        | <i>Medang</i>     | Myrtaceae               | <i>Syzygium urceolatum</i>                                        | <i>Samak</i>                    | Dilleniaceae                | <i>Dillenia suffruticosa</i>                                     | <i>Simpur</i>                        |
| 15 | SG_Kem_3               | Kem     | 3°3' 25.8" S<br>107°49' 42.2" E | SHF            | <i>Ungad</i>            | Lauraceae      | <i>Cryptocarya sp.</i>        | <i>Medang</i>     | Dilleniaceae            | <i>Dillenia suffruticosa</i>                                      | <i>Simpur</i>                   | Dilleniaceae                | <i>Dillenia suffruticosa</i>                                     | <i>Simpur</i>                        |
| 16 | SG_Kem_15              | Kem     | 3°03'28.8"S<br>107°49'45.0"E    | SHF            | <i>Tunggak muke</i>     | Aquifoliaceae  | <i>Ilex cymosa</i>            | <i>Mensirak</i>   | Myrtaceae               | <i>Syzygium acuminatissima</i>                                    | <i>Cingkang</i>                 | Dilleniaceae, Hypericaceae  | <i>Dillenia suffruticosa</i> ,<br><i>Cratoxylum glaucum</i>      | <i>Simpur</i> ,<br><i>Gerunggang</i> |
| 17 | SG_Kem_6               | Kem     | 3°3' 38.2" S<br>107°49' 57.7" E | SHF            | <i>Ungad</i>            | Hypericaceae   | <i>Cratoxylum glaucum</i>     | <i>Gerunggang</i> | Hypericaceae            | <i>Cratoxylum glaucum</i>                                         | <i>Gerunggang</i>               | Soil                        | <i>Soil</i>                                                      | <i>Soil</i>                          |
| 18 | SG_Kem_10              | Kem     | 3°3' 48.7" S<br>107°50' 20.6" E | MF             | <i>Ungad</i>            | Combretaceae   | <i>Lumnitzera littorea</i>    | <i>Teruntum</i>   | Combretaceae            | <i>Lumnitzera littorea</i>                                        | <i>Teruntum</i>                 | Combretaceae                | <i>Lumnitzera littorea</i>                                       | <i>Teruntum</i>                      |
| 19 | SG_Kem_9               | Kem     | 3°3' 49.1" S<br>107°50' 21.5" E | MF             | <i>Tunggak Muke</i>     | Myrtaceae      | <i>Syzygium urceolatum</i>    | <i>Samak</i>      | Combretaceae            | <i>Lumnitzera littorea</i>                                        | <i>Teruntum</i>                 | Primulaceae                 | <i>Ardisia haseltii</i>                                          | <i>Ubi-ubi</i>                       |
| 20 | SG_Per_10              | Per     | 3°2' 50.1" S<br>107°40' 44.9" E | HF             | <i>Tunggak Muke</i>     | Calophyllaceae | <i>Calophyllum sp.</i>        | <i>Betor</i>      | Calophyllaceae          | <i>Calophyllum sp.</i>                                            | <i>Betor</i>                    | Calophyllaceae              | <i>Calophyllum sp.</i>                                           | <i>Betor</i>                         |

|    |           |     |                                 |     |                     |                   |                                |                        |                |                                |                |                |                               |                   |
|----|-----------|-----|---------------------------------|-----|---------------------|-------------------|--------------------------------|------------------------|----------------|--------------------------------|----------------|----------------|-------------------------------|-------------------|
| 21 | SG_Per_11 | Per | 3°2' 51.7" S<br>107°40' 46.0" E | HF  | <i>Tunggak Muke</i> | Calophyllaceae    | <i>Calophyllum</i> sp.         | <i>Betor</i>           | Calophyllaceae | <i>Calophyllum</i> sp.         | <i>Betor</i>   | Calophyllaceae | <i>Calophyllum</i> sp.        | <i>Betor</i>      |
| 22 | SG_Per_55 | Per | 3°04'20.2" S<br>107°40'33.4" E  | SHF | <i>Tunggak Muke</i> | Calophyllaceae    | <i>Calophyllum</i> sp.         | <i>Betor</i>           | Myrtaceae      | <i>Melaleuca cajuputi</i>      | <i>Gelam</i>   | Myrtaceae      | <i>Melaleuca cajuputi</i>     | <i>Gelam</i>      |
| 23 | SG_Per_23 | Per | 3°05'57.7" S<br>107°36'56.2" E  | SHF | <i>Bantaian</i>     | Hypericaceae      | <i>Cratoxylum glaucum</i>      | <i>Gerunggang</i>      | Myrtaceae      | <i>Syzygium urceolatum</i>     | <i>Gelam</i>   | Myrtaceae      | <i>Syzygium urceolatum</i>    | <i>Gelam</i>      |
| 24 | SG_Per_24 | Per | 3°05'57.7" S<br>107°36'57.9" E  | SHF | <i>Bantaian</i>     | Hypericaceae      | <i>Cratoxylum glaucum</i>      | <i>Gerunggang</i>      | Myrtaceae      | <i>Syzygium urceolatum</i>     | <i>Gelam</i>   | Myrtaceae      | <i>Syzygium urceolatum</i>    | <i>Gelam</i>      |
| 25 | SG_Per_32 | Per | 3°05'46.6" S<br>107°36'40.9" E  | SHF | <i>Bantaian</i>     | Hypericaceae      | <i>Cratoxylum glaucum</i>      | <i>Gerunggang</i>      | Myrtaceae      | <i>Syzygium urceolatum</i>     | <i>Gelam</i>   | Myrtaceae      | <i>Syzygium urceolatum</i>    | <i>Gelam</i>      |
| 26 | SG_Per_34 | Per | 3°5' 49.7" S<br>107°36' 45.4" E | SHF | <i>Tunggak Muke</i> | Hypericaceae      | <i>Cratoxylum glaucum</i>      | <i>Gerunggang</i>      | Myrtaceae      | <i>Syzygium urceolatum</i>     | <i>Gelam</i>   | Myrtaceae      | <i>Syzygium urceolatum</i>    | <i>Gelam</i>      |
| 27 | SG_Per_35 | Per | 3°05'49.6" S<br>107°36'45.0" E  | SHF | <i>Tunggak Muke</i> | Hypericaceae      | <i>Cratoxylum glaucum</i>      | <i>Gerunggang</i>      | Myrtaceae      | <i>Syzygium urceolatum</i>     | <i>Gelam</i>   | Myrtaceae      | <i>Syzygium urceolatum</i>    | <i>Gelam</i>      |
| 28 | SG_Per_50 | Per | 3°6' 22.9" S<br>107°36' 57.3" E | MF  | <i>Tunggak Muke</i> | Myrtaceae         | <i>Syzygium urceolatum</i>     | <i>Samak</i>           | Myrtaceae      | <i>Syzygium urceolatum</i>     | <i>Gelam</i>   | Myrtaceae      | <i>Syzygium urceolatum</i>    | <i>Gelam</i>      |
| 29 | SG_Per_31 | Per | 3°5' 46.9" S<br>107°36' 41.1" E | SHF | <i>Tunggak Muke</i> | Hypericaceae      | <i>Cratoxylum glaucum</i>      | <i>Gerunggang</i>      | Myrtaceae      | <i>Tristaniaopsis obovata</i>  | <i>Pelawan</i> | Myrtaceae      | <i>Syzygium urceolatum</i>    | <i>Gelam</i>      |
| 30 | SG_Per_29 | Per | 3°05'47.9" S<br>107°36'41.0" E  | SHF | <i>Bantaian</i>     | Pentaphylantaceae | <i>Eurya glabra</i>            | <i>Pelempang putih</i> | Myrtaceae      | <i>Tristaniaopsis obovata</i>  | <i>Pelawan</i> | Hypericaceae   | <i>Cratoxylum glaucum</i>     | <i>Gerunggang</i> |
| 31 | SG_Per_41 | Per | 3°05'58.2" S<br>107°36'56.9" E  | SHF | <i>Bantaian</i>     | Myrtaceae         | <i>Syzygium acuminatissima</i> | <i>Sapat</i>           | Myrtaceae      | <i>Syzygium urceolatum</i>     | <i>Gelam</i>   | Clusiaceae     | <i>Garcinia bancana</i>       | <i>Melak</i>      |
| 32 | SG_Per_38 | Per | 3°05'54.6" S<br>107°36'58.1" E  | SHF | <i>Bantaian</i>     | Myrtaceae         | <i>Syzygium acuminatissima</i> | <i>Sapat</i>           | Myrtaceae      | <i>Syzygium acuminatissima</i> | <i>Sapat</i>   | Clusiaceae     | <i>Garcinia bancana</i>       | <i>Melak</i>      |
| 33 | SG_Per_9  | Per | 3°2' 49.4" S<br>107°40' 45.0" E | HF  | <i>Tunggak Muke</i> | Calophyllaceae    | <i>Calophyllum</i> sp.         | <i>Betor</i>           | Calophyllaceae | <i>Calophyllum</i> sp.         | <i>Betor</i>   | Myrtaceae      | <i>Tristaniaopsis obovata</i> | <i>Pelawan</i>    |
| 34 | SG_Per_26 | Per | 3°2' 50.2" S<br>107°40' 42.3" E | HF  | <i>Tunggak Muke</i> | Calophyllaceae    | <i>Calophyllum</i> sp.         | <i>Betor</i>           | Myrtaceae      | <i>Melaleuca cajuputi</i>      | <i>Gelam</i>   | Myrtaceae      | <i>Tristaniaopsis obovata</i> | <i>Pelawan</i>    |
| 35 | SG_Per_14 | Per | 3°5' 42.4" S<br>107°37' 15.1" E | HF  | <i>Tunggak Muke</i> | Calophyllaceae    | <i>Calophyllum</i> sp.         | <i>Betor</i>           | Myrtaceae      | <i>Tristaniaopsis obovata</i>  | <i>Pelawan</i> | Myrtaceae      | <i>Tristaniaopsis obovata</i> | <i>Pelawan</i>    |
| 36 | SG_Per_25 | Per | 3°05'56.5" S<br>107°36'58.4" E  | SHF | <i>Bantaian</i>     | Calophyllaceae    | <i>Calophyllum</i> sp.         | <i>Betor</i>           | Myrtaceae      | <i>Tristaniaopsis obovata</i>  | <i>Pelawan</i> | Myrtaceae      | <i>Tristaniaopsis obovata</i> | <i>Pelawan</i>    |
| 37 | SG_Per_27 | Per | 3°2' 48.2" S<br>107°40' 44.2" E | HF  | <i>Tunggak Muke</i> | Calophyllaceae    | <i>Calophyllum</i> sp.         | <i>Betor</i>           | Myrtaceae      | <i>Tristaniaopsis obovata</i>  | <i>Pelawan</i> | Myrtaceae      | <i>Tristaniaopsis obovata</i> | <i>Pelawan</i>    |
| 38 | SG_Per_33 | Per | 3°05'46.5" S<br>107°36'40.3" E  | SHF | <i>Tunggak Muke</i> | Calophyllaceae    | <i>Calophyllum</i> sp.         | <i>Betor</i>           | Myrtaceae      | <i>Tristaniaopsis obovata</i>  | <i>Pelawan</i> | Myrtaceae      | <i>Tristaniaopsis obovata</i> | <i>Pelawan</i>    |
| 39 | SG_Per_6  | Per | 3°2' 50.7" S<br>107°40' 40.7" E | HF  | <i>Tunggak Muke</i> | Calophyllaceae    | <i>Calophyllum</i> sp.         | <i>Betor</i>           | Myrtaceae      | <i>Tristaniaopsis obovata</i>  | <i>Pelawan</i> | Myrtaceae      | <i>Tristaniaopsis obovata</i> | <i>Pelawan</i>    |
| 40 | SG_Per_39 | Per | 3°05'55.0" S<br>107°36'57.8" E  | SHF | <i>Bantaian</i>     | Calophyllaceae    | <i>Calophyllum</i> sp.         | <i>Betor</i>           | Myrtaceae      | <i>Tristaniaopsis obovata</i>  | <i>Pelawan</i> | Myrtaceae      | <i>Tristaniaopsis obovata</i> | <i>Pelawan</i>    |
| 41 | SG_Per_54 | Per | 3°4' 19.6" S<br>107°40' 33.8" E | HF  | <i>Ungad</i>        | Myrtaceae         | <i>Syzygium urceolatum</i>     | <i>Gelam</i>           | Myrtaceae      | <i>Tristaniaopsis obovata</i>  | <i>Pelawan</i> | Myrtaceae      | <i>Tristaniaopsis obovata</i> | <i>Pelawan</i>    |
| 42 | SG_Per_36 | Per | 3°05'50.3" S<br>107°36'45.1" E  | SHF | <i>Tunggak Muke</i> | Hypericaceae      | <i>Cratoxylum glaucum</i>      | <i>Gerunggang</i>      | Myrtaceae      | <i>Tristaniaopsis obovata</i>  | <i>Pelawan</i> | Myrtaceae      | <i>Tristaniaopsis obovata</i> | <i>Pelawan</i>    |
| 43 | SG_Per_37 | Per | 3°05'49.6" S<br>107°36'50.6" E  | SHF | <i>Tunggak Muke</i> | Hypericaceae      | <i>Cratoxylum glaucum</i>      | <i>Gerunggang</i>      | Myrtaceae      | <i>Tristaniaopsis obovata</i>  | <i>Pelawan</i> | Myrtaceae      | <i>Tristaniaopsis obovata</i> | <i>Pelawan</i>    |
| 44 | SG_Per_7  | Per | 3°2' 50.0" S<br>107°40' 42.1" E | HF  | <i>tunggak muke</i> | Hypericaceae      | <i>Cratoxylum glaucum</i>      | <i>Gerunggang</i>      | Myrtaceae      | <i>Tristaniaopsis obovata</i>  | <i>Pelawan</i> | Myrtaceae      | <i>Tristaniaopsis obovata</i> | <i>Pelawan</i>    |
| 45 | SG_Per_8  | Per | 3°2' 48.3" S<br>107°40' 44.8" E | HF  | <i>tunggak muke</i> | Hypericaceae      | <i>Cratoxylum glaucum</i>      | <i>Gerunggang</i>      | Myrtaceae      | <i>Tristaniaopsis obovata</i>  | <i>Pelawan</i> | Myrtaceae      | <i>Tristaniaopsis obovata</i> | <i>Pelawan</i>    |
| 46 | SG_Per_12 | Per | 3°2' 53.3" S<br>107°40' 45.7" E | HF  | <i>tunggak muke</i> | Lauraceae         | <i>Cryptocarya</i> sp.         | <i>Medang</i>          | Myrtaceae      | <i>Tristaniaopsis obovata</i>  | <i>Pelawan</i> | Myrtaceae      | <i>Tristaniaopsis obovata</i> | <i>Pelawan</i>    |
| 47 | SG_Per_17 | Per | 3°5' 43.4" S<br>107°37' 13.8" E | HF  | <i>tunggak muke</i> | Lauraceae         | <i>Cryptocarya</i> sp.         | <i>Medang</i>          | Myrtaceae      | <i>Tristaniaopsis obovata</i>  | <i>Pelawan</i> | Myrtaceae      | <i>Tristaniaopsis obovata</i> | <i>Pelawan</i>    |
| 48 | SG_Per_18 | Per | 3°5' 47.0" S<br>107°37' 14.6" E | HF  | <i>tunggak muke</i> | Aquifoliaceae     | <i>Ilex cymosa</i>             | <i>Mensirak</i>        | Myrtaceae      | <i>Tristaniaopsis obovata</i>  | <i>Pelawan</i> | Myrtaceae      | <i>Tristaniaopsis obovata</i> | <i>Pelawan</i>    |

|    |           |     |                                 |     |                     |                  |                               |                   |                  |                                |                        |                  |                                |                        |
|----|-----------|-----|---------------------------------|-----|---------------------|------------------|-------------------------------|-------------------|------------------|--------------------------------|------------------------|------------------|--------------------------------|------------------------|
| 49 | SG_Per_53 | Per | 3°4' 19.4" S<br>107°40' 33.8" E | HF  | <i>Tunggak Muke</i> | Myrtaceae        | <i>Tristaniaopsis obovata</i> | <i>Pelawan</i>    | Myrtaceae        | <i>Tristaniaopsis obovata</i>  | <i>Pelawan</i>         | Myrtaceae        | <i>Tristaniaopsis obovata</i>  | <i>Pelawan</i>         |
| 50 | SG_Per_40 | Per | 3°05'58.2" S<br>107°36'57.4" E  | SHF | <i>Bantaian</i>     | Hypericaceae     | <i>Cratoxylum glaucum</i>     | <i>Gerunggang</i> | Dipterocarpaceae | <i>Hopea bilitonensis</i>      | <i>Pelepak</i>         | Myrtaceae        | <i>Tristaniaopsis obovata</i>  | <i>Pelawan</i>         |
| 51 | SG_Per_6  | Per | 3°02'41.7" S<br>107°40'37.6" E  | HF  | <i>Bantaian</i>     | Lauraceae        | <i>Cryptocarya sp.</i>        | <i>Medang</i>     | Dipterocarpaceae | <i>Hopea bilitonensis</i>      | <i>Pelepak</i>         | Myrtaceae        | <i>Tristaniaopsis obovata</i>  | <i>Pelawan</i>         |
| 52 | SG_Per_4  | Per | 3°2' 38.5" S<br>107°40' 33.9" E | HF  | <i>Tunggak Muke</i> | Myrtaceae        | <i>Syzygium urceolatum</i>    | <i>Samak</i>      | Dipterocarpaceae | <i>Hopea bilitonensis</i>      | <i>Pelepak</i>         | Myrtaceae        | <i>Tristaniaopsis obovata</i>  | <i>Pelawan</i>         |
| 53 | SG_Per_15 | Per | 3°5' 38.8" S<br>107°37' 15.5" E | HF  | <i>Tunggak Muke</i> | Primulaceae      | <i>Ardisia haseltii</i>       | <i>Ubi-ubi</i>    | Myrtaceae        | <i>Syzygium bankense</i>       | <i>Sudong pelanduk</i> | Myrtaceae        | <i>Tristaniaopsis obovata</i>  | <i>Pelawan</i>         |
| 54 | SG_Per_22 | Per | 3°05'58.5" S<br>107°36'51.4" E  | SHF | <i>Bantaian</i>     | Lauraceae        | <i>Cryptocarya sp.</i>        | <i>Medang</i>     | Dipterocarpaceae | <i>Hopea bilitonensis</i>      | <i>Pelapak</i>         | Dipterocarpaceae | <i>Hopea bilitonensis</i>      | <i>Pelepak</i>         |
| 55 | SG_Per_16 | Per | 3°5' 38.8" S<br>107°37' 14.9" E | HF  | <i>tunggak muke</i> | Lauraceae        | <i>Cryptocarya sp.</i>        | <i>Medang</i>     | Myrtaceae        | <i>Tristaniaopsis obovata</i>  | <i>Pelawan</i>         | Dipterocarpaceae | <i>Hopea bilitonensis</i>      | <i>Pelepak</i>         |
| 56 | SG_Per_2  | Per | 3°02'35.7" S<br>107°40'39.2" E  | HF  | <i>Tunggak Muke</i> | Dipterocarpaceae | <i>Hopea bilitonensis</i>     | <i>Pelepak</i>    | Myrtaceae        | <i>Tristaniaopsis obovata</i>  | <i>Pelawan</i>         | Dipterocarpaceae | <i>Hopea bilitonensis</i>      | <i>Pelepak</i>         |
| 57 | SG_Per_13 | Per | 3°4' 38.5" S<br>107°40' 30.7" E | HF  | <i>Bantaian</i>     | Lauraceae        | <i>Cryptocarya sp.</i>        | <i>Medang</i>     | Dipterocarpaceae | <i>Hopea bilitonensis</i>      | <i>Pelepak</i>         | Dipterocarpaceae | <i>Hopea bilitonensis</i>      | <i>Pelepak</i>         |
| 58 | SG_Per_19 | Per | 3°06'03.3" S<br>107°36'58.7" E  | SHF | <i>Bantaian</i>     | Lauraceae        | <i>Cryptocarya sp.</i>        | <i>Medang</i>     | Dipterocarpaceae | <i>Hopea bilitonensis</i>      | <i>Pelepak</i>         | Dipterocarpaceae | <i>Hopea bilitonensis</i>      | <i>Pelepak</i>         |
| 59 | SG_Per_3  | Per | 3°2' 34.8" S<br>107°40' 37.8" E | HF  | <i>Tunggak Muke</i> | Myrtaceae        | <i>Syzygium urceolatum</i>    | <i>Samak</i>      | Dipterocarpaceae | <i>Hopea bilitonensis</i>      | <i>Pelepak</i>         | Dipterocarpaceae | <i>Hopea bilitonensis</i>      | <i>Pelepak</i>         |
| 60 | SG_Per_5  | Per | 3°02'41.3" S<br>107°40'34.4" E  | HF  | <i>Bantaian</i>     | Lauraceae        | <i>Cryptocarya sp.</i>        | <i>Medang</i>     | Myrtaceae        | <i>Syzygium urceolatum</i>     | <i>Samak</i>           | Dipterocarpaceae | <i>Hopea bilitonensis</i>      | <i>Pelepak</i>         |
| 61 | SG_Per_59 | Per | 3°06'20.1" S<br>107°36'56.2" E  | MF  | <i>Tunggak Muke</i> | Hypericaceae     | <i>Cratoxylum glaucum</i>     | <i>Gerunggang</i> | Myrtaceae        | <i>Syzygium urceolatum</i>     | <i>Gelam</i>           | Podocarpaceae    | <i>Podocarpus neriifolius</i>  | <i>Punyok</i>          |
| 62 | SG_Per_30 | Per | 3°05'47.7" S<br>107°36'42.4" E  | SHF | <i>Tunggak Muke</i> | Myrtaceae        | <i>Syzygium urceolatum</i>    | <i>Samak</i>      | Myrtaceae        | <i>Syzygium acuminatissima</i> | <i>Sapat</i>           | Myrtaceae        | <i>Syzygium acuminatissima</i> | <i>Sapat</i>           |
| 63 | SG_Per_1  | Per | 3°02'35.8" S<br>107°40'39.2" E  | HF  | <i>Tunggak Muke</i> | Myrtaceae        | <i>Syzygium urceolatum</i>    | <i>Samak</i>      | Myrtaceae        | <i>Tristaniaopsis obovata</i>  | <i>Pelawan</i>         | Myrtaceae        | <i>Syzygium bankense</i>       | <i>Sudong pelanduk</i> |
| 64 | SG_Per_28 | Per | 3°2' 53.7" S<br>107°40' 43.5" E | HF  | <i>tunggak muke</i> | Lauraceae        | <i>Cryptocarya sp.</i>        | <i>Medang</i>     | Dipterocarpaceae | <i>Hopea bilitonensis</i>      | <i>Pelepak</i>         | Myrtaceae        | <i>Syzygium bankense</i>       | <i>Sudong pelanduk</i> |
| 65 | SG_Per_44 | Per | 3°6' 18.0" S<br>107°36' 52.9" E | MF  | <i>Ungad</i>        | Myrtaceae        | <i>Syzygium urceolatum</i>    | <i>Gelam</i>      | Myrtaceae        | <i>Syzygium urceolatum</i>     | <i>Gelam</i>           | Combretaceae     | <i>Lumnitzera littorea</i>     | <i>Teruntum</i>        |
| 66 | SG_Per_56 | Per | 3°06'22.6" S<br>107°36'53.1" E  | MF  | <i>Tunggak Muke</i> | Combretaceae     | <i>Lumnitzera littorea</i>    | <i>Teruntum</i>   | Podocarpaceae    | <i>Podocarpus neriifolius</i>  | <i>Punyok</i>          | Combretaceae     | <i>Lumnitzera littorea</i>     | <i>Teruntum</i>        |
| 67 | SG_Per_46 | Per | 3°6' 19.0" S<br>107°36' 53.0" E | MF  | <i>Tunggak Muke</i> | Calophyllaceae   | <i>Calophyllum sp.</i>        | <i>Betor</i>      | Combretaceae     | <i>Lumnitzera littorea</i>     | <i>Teruntum</i>        | Combretaceae     | <i>Lumnitzera littorea</i>     | <i>Teruntum</i>        |
| 68 | SG_Per_52 | Per | 3°6' 19.8" S<br>107°36' 56.4" E | MF  | <i>Tunggak Muke</i> | Calophyllaceae   | <i>Calophyllum sp.</i>        | <i>Betor</i>      | Combretaceae     | <i>Lumnitzera littorea</i>     | <i>Teruntum</i>        | Combretaceae     | <i>Lumnitzera littorea</i>     | <i>Teruntum</i>        |
| 69 | SG_Per_51 | Per | 3°6' 20.5" S<br>107°36' 56.8" E | MF  | <i>Tunggak Muke</i> | Lauraceae        | <i>Cryptocarya sp.</i>        | <i>Medang</i>     | Combretaceae     | <i>Lumnitzera littorea</i>     | <i>Teruntum</i>        | Combretaceae     | <i>Lumnitzera littorea</i>     | <i>Teruntum</i>        |
| 70 | SG_Per_43 | Per | 3°6' 18.2" S<br>107°36' 52.4" E | MF  | <i>Ungad</i>        | Podocarpaceae    | <i>Podocarpus neriifolius</i> | <i>Punyok</i>     | Combretaceae     | <i>Lumnitzera littorea</i>     | <i>Teruntum</i>        | Combretaceae     | <i>Lumnitzera littorea</i>     | <i>Teruntum</i>        |
| 71 | SG_Per_45 | Per | 3°6' 17.9" S<br>107°36' 52.8" E | MF  | <i>Tunggak Muke</i> | Podocarpaceae    | <i>Podocarpus neriifolius</i> | <i>Punyok</i>     | Combretaceae     | <i>Lumnitzera littorea</i>     | <i>Teruntum</i>        | Combretaceae     | <i>Lumnitzera littorea</i>     | <i>Teruntum</i>        |
| 72 | SG_Per_47 | Per | 3°06'22.4" S<br>107°36'52.5" E  | MF  | <i>Bantaian</i>     | Podocarpaceae    | <i>Podocarpus neriifolius</i> | <i>Punyok</i>     | Combretaceae     | <i>Lumnitzera littorea</i>     | <i>Teruntum</i>        | Combretaceae     | <i>Lumnitzera littorea</i>     | <i>Teruntum</i>        |
| 73 | SG_Per_48 | Per | 3°6' 22.6" S<br>107°36' 52.3" E | MF  | <i>Ungad</i>        | Podocarpaceae    | <i>Podocarpus neriifolius</i> | <i>Punyok</i>     | Combretaceae     | <i>Lumnitzera littorea</i>     | <i>Teruntum</i>        | Combretaceae     | <i>Lumnitzera littorea</i>     | <i>Teruntum</i>        |
| 74 | SG_Per_49 | Per | 3°6' 22.8" S<br>107°36' 52.8" E | MF  | <i>Ungad</i>        | Podocarpaceae    | <i>Podocarpus neriifolius</i> | <i>Punyok</i>     | Combretaceae     | <i>Lumnitzera littorea</i>     | <i>Teruntum</i>        | Combretaceae     | <i>Lumnitzera littorea</i>     | <i>Teruntum</i>        |
| 75 | SG_Per_57 | Per | 3°06'22.3" S<br>107°36'53.3" E  | MF  | <i>Bantaian</i>     | Podocarpaceae    | <i>Podocarpus neriifolius</i> | <i>Punyok</i>     | Combretaceae     | <i>Lumnitzera littorea</i>     | <i>Teruntum</i>        | Combretaceae     | <i>Lumnitzera littorea</i>     | <i>Teruntum</i>        |
| 76 | SG_Per_58 | Per | 3°06'22.6" S<br>107°36'52.0" E  | MF  | <i>Bantaian</i>     | Combretaceae     | <i>Lumnitzera littorea</i>    | <i>Teruntum</i>   | Combretaceae     | <i>Lumnitzera littorea</i>     | <i>Teruntum</i>        | Combretaceae     | <i>Lumnitzera littorea</i>     | <i>Teruntum</i>        |

|    |              |        |                                 |    |              |                |                            |                    |                  |                            |                    |                  |                            |                      |
|----|--------------|--------|---------------------------------|----|--------------|----------------|----------------------------|--------------------|------------------|----------------------------|--------------------|------------------|----------------------------|----------------------|
| 77 | SG_TR-Bel_7  | TR-Bel | 3°8' 24.0" S<br>107°48' 30.6" E | HF | Bersilang    | Phyllanthaceae | Aporosa frutescens         | Pelangas           | Dipterocarpaceae | Hopea bilitonensis         | Pelepak            | -                | -                          | -                    |
| 78 | SG_TR-Bel_11 | TR-Bel | 3°8' 26.2" S<br>107°48' 24.8" E | HF | Ungad        | Aquifoliaceae  | Ilex cymosa                | Mensirak           | Calophyllaceae   | Calophyllum sp.            | Betor              | Calophyllaceae   | Calophyllum sp.            | Betor                |
| 79 | SG_TR-Bel_2  | TR-Bel | 3°8' 0.2" S<br>107°49' 28.8" E  | HF | Bantaian     | Myrtaceae      | Syzygium bank-<br>ense     | Sudong<br>pelandok | Myrtaceae        | Syzygium urceo-<br>latum   | Samak              | Calophyllaceae   | Calophyllum sp.            | Betor                |
| 80 | SG_TR-Bel_4  | TR-Bel | 3°8' 25.7" S<br>107°48' 27.8" E | HF | Tunggak Muke | Lauraceae      | Cryptocarya sp.            | Medang             | Araliaceae       | Arthrophyllum<br>javanicum | Juluk antu         | Araliaceae       | Arthrophyllum<br>javanicum | Juluk antu           |
| 81 | SG_TR-Bel_10 | TR-Bel | 3°08'24.1"S<br>107°48'29.1"E    | HF | Bantaian     | Proteacea      | Helicia robusta            | Mengkikir          | Phyllanthaceae   | Aporosa fruescens          | Pelangas           | Phyllanthaceae   | Aporosa fruescens          | Pelangas             |
| 82 | SG_TR-Bel_5  | TR-Bel | 3°8' 24.7" S<br>107°48' 28.7" E | HF | Ungad        | Araliaceae     | Arthrophyllum<br>javanicum | Juluk Antu         | Lauraceae        | Cryptocarya sp.            | Medang             | Dipterocarpaceae | Hopea bilitonensis         | Pelepak              |
| 83 | SG_TR-Bel_8  | TR-Bel | 3°8' 24.3" S<br>107°48' 30.7" E | HF | Bantaian     | Proteacea      | Helicia robusta            | Mengkikir          | Phyllanthaceae   | Aporosa fruescens          | Pelangas           | Dipterocarpaceae | Hopea bilitonensis         | Pelepak              |
| 84 | SG_TR-Bel_3  | TR-Bel | 3°8' 24.3" S<br>107°48' 28.2" E | HF | Ungad        | Proteacea      | Helicia robusta            | Mengkikir          | Calophyllaceae   | Calophyllum sp.            | Betor              | Theaceae         | Eurya acuminata<br>DC.     | Salah                |
| 85 | SG_TR-Bel_14 | TR-Bel | 3°8' 52.3" S<br>107°48' 43.5" E | HF | Ungad        | Calophyllaceae | Calophyllum sp.            | Betor              | Theaceae         | Eurya acuminata<br>DC.     | Salah              | Myrtaceae        | Schima walichii            | Seruk                |
| 86 | SG_TR-Bel_1  | TR-Bel | 3°8' 9.5" S<br>107°49' 51.5" E  | HF | Bantaian     | Myrtaceae      | Syzygium urceo-<br>latum   | Samak              | Myrtaceae        | Syzygium bank-<br>ense     | Sudong<br>pelanduk | Myrtaceae        | Syzygium bank-<br>ense     | Sudong pelan-<br>duk |
| 87 | SG_TR-Kam_1  | TR-Kam | 3°6' 32.7" S<br>107°50' 23.7" E | HF | Bantaian     | Calophyllaceae | Calophyllum sp.            | Betor              | Myrtaceae        | Tristaniopsis<br>obovata   | Pelawan            | Myrtaceae        | Tristaniopsis<br>obovata   | Pelawan              |
| 88 | SG_TR-Kam_2  | TR-Kam | 3°6' 12.6" S<br>107°50' 42.4" E | HF | Bantaian     | Calophyllaceae | Calophyllum sp.            | Betor              | Myrtaceae        | Baeckea frutescens         | Sapu-sapu          | Myrtaceae        | Tristaniopsis<br>obovata   | Pelawan              |
| 89 | SG_TR-Kam_9  | TR-Kam | 3°06'40.5"S<br>107°50'42.6"E    | MF | Tunggak Muke | Myrtaceae      | Syzygium urceo-<br>latum   | Samak              | Myrtaceae        | Rhodamnia<br>cinerea       | Jemang             | Myrtaceae        | Syzygium urceo-<br>latum   | Samak                |
| 90 | SG_TR-Kam_4  | TR-Kam | 3°6' 11.8" S<br>107°50' 43.9" E | HF | Tunggak Muke | Myrtaceae      | Syzygium urceo-<br>latum   | Samak              | Myrtaceae        | Syzygium urceo-<br>latum   | Samak              | Myrtaceae        | Syzygium urceo-<br>latum   | Samak                |
| 91 | SG_TR-Kam_8  | TR-Kam | 3°06'40.3"S<br>107°50'42.5"E    | MF | Tunggak Muke | Myrtaceae      | Syzygium urceo-<br>latum   | Samak              | Myrtaceae        | Syzygium urceo-<br>latum   | Samak              | Myrtaceae        | Syzygium urceo-<br>latum   | Samak                |
| 92 | SG_TR-Kam_3  | TR-Kam | 3°6' 12.1" S<br>107°50' 43.2" E | HF | Bantaian     | Hypericaceae   | Cratoxylum<br>glaucum      | Gerunggang         | Myrtaceae        | Melaleuca caju-<br>puti    | Gelam              | Myrtaceae        | Baeckea frutescens         | Sapu-sapu            |
| 93 | SG_TR-Kam_7  | TR-Kam | 3°6' 21.5" S<br>107°50' 29.8" E | HF | Bantaian     | Hypericaceae   | Cratoxylum<br>glaucum      | Gerunggang         | Myrtaceae        | Melaleuca caju-<br>puti    | Gelam              | Myrtaceae        | Baeckea frutescens         | Sapu-sapu            |
| 94 | SG_TR-Kam_5  | TR-Kam | 3°6' 15.9" S<br>107°50' 41.1" E | HF | Bantaian     | Myrtaceae      | Syzygium urceo-<br>latum   | Samak              | Myrtaceae        | Baeckea frutescens         | Sapu-sapu          | Myrtaceae        | Baeckea frutescens         | Sapu-sapu            |
| 95 | SG_TR-Kam_6  | TR-Kam | 3°6' 19.2" S<br>107°50' 43.8" E | HF | Bantaian     | Myrtaceae      | Syzygium urceo-<br>latum   | Samak              | Myrtaceae        | Baeckea frutescens         | Sapu-sapu          | Myrtaceae        | Baeckea frutescens         | Sapu-sapu            |

**Table S4.** Ethnobotanical indices of plant species use for *sunggau*: Number of Uses (NU), Use Report (UR), Cultural Index (CI), Frequency of Citation (FC), Relative Frequency of Citation (RFC).

| NO | Species code | Family name      | Scientific name                 | Local name             | NU | UR | CI    | FC | RFC   |
|----|--------------|------------------|---------------------------------|------------------------|----|----|-------|----|-------|
| 1  | Ana_1        | Anacardiaceae    | <i>Buchanania arborescens</i>   | <i>Pao</i>             | 4  | 16 | 0.421 | 9  | 0.237 |
| 2  | Ann_1        | Annonaceae       | <i>Neouvaria acuminatissima</i> | <i>Rarak</i>           | 1  | 1  | 0.026 | 1  | 0.026 |
| 3  | Apo_1        | Apocynaceae      | <i>Cerbera manghas</i>          | <i>Emperuak</i>        | 1  | 1  | 0.026 | 1  | 0.026 |
| 4  | Aqu_1        | Aquifoliaceae    | <i>Ilex cymosa</i>              | <i>Mensirak</i>        | 4  | 21 | 0.553 | 12 | 0.316 |
| 5  | Ara_1        | Araliaceae       | <i>Arthrophyllum javanicum</i>  | <i>Juluk antu</i>      | 1  | 1  | 0.026 | 1  | 0.026 |
| 6  | Are_1        | Arecaceae        | <i>Calamus caesius</i>          | <i>Rotan</i>           | 1  | 1  | 0.026 | 1  | 0.026 |
| 7  | Ast_1        | Asteraceae       | <i>Vernonia arborea</i>         | <i>Mentepong</i>       | 3  | 15 | 0.395 | 9  | 0.237 |
| 8  | Cal_1        | Calophyllaceae   | <i>Calophyllum</i> sp.          | <i>Betor</i>           | 6  | 68 | 1.789 | 26 | 0.684 |
| 9  | Cal_2        | Calophyllaceae   | <i>Calophyllum lanigerum</i>    | <i>Betor belulang</i>  | 4  | 11 | 0.289 | 4  | 0.105 |
| 10 | Cal_3        | Calophyllaceae   | <i>Calophyllum soulattri</i>    | <i>Betor berubuk</i>   | 2  | 2  | 0.053 | 1  | 0.026 |
| 11 | Cal_4        | Calophyllaceae   | <i>Calophyllum pulcherrimum</i> | <i>Betor padi</i>      | 5  | 15 | 0.395 | 7  | 0.184 |
| 12 | Cal_5        | Calophyllaceae   | <i>Calophyllum soulattri</i>    | <i>Malong</i>          | 2  | 4  | 0.105 | 2  | 0.053 |
| 13 | Clu_1        | Clusiaceae       | <i>Garcinia bancana</i>         | <i>Melak</i>           | 3  | 16 | 0.421 | 9  | 0.237 |
| 14 | Comb_1       | Combretaceae     | <i>Lumnitzera littorea</i>      | <i>Teruntum merah</i>  | 3  | 12 | 0.316 | 7  | 0.184 |
| 15 | Comb_2       | Combretaceae     | <i>Lumnitzera racemosa</i>      | <i>Teruntum putih</i>  | 2  | 5  | 0.132 | 4  | 0.105 |
| 16 | Dil_1        | Dilleniaceae     | <i>Dillenia suffruticosa</i>    | <i>Simpur bini</i>     | 2  | 2  | 0.053 | 1  | 0.026 |
| 17 | Dip_1        | Dipterocarpaceae | <i>Shorea balangeran</i>        | <i>Belangeran</i>      | 3  | 11 | 0.289 | 6  | 0.158 |
| 18 | Dip_2        | Dipterocarpaceae | <i>Hopea bilitonensis</i>       | <i>Pelepak</i>         | 5  | 13 | 0.342 | 6  | 0.158 |
| 19 | Eri_1        | Ericaceae        | <i>Styphelia malayana</i>       | <i>Alu-alu</i>         | 3  | 3  | 0.079 | 1  | 0.026 |
| 20 | Eup_1        | Euphorbiaceae    | <i>Mallotus barbatus</i>        | <i>Balik angin</i>     | 3  | 3  | 0.079 | 1  | 0.026 |
| 21 | Eup_2        | Euphorbiaceae    | <i>Excoecaria agallocha</i>     | <i>Butak</i>           | 2  | 5  | 0.132 | 4  | 0.105 |
| 22 | Fab_1        | Fabaceae         | <i>Spatholobus ferrugineus</i>  | <i>Berebat</i>         | 2  | 2  | 0.053 | 1  | 0.026 |
| 23 | Fab_2        | Fabaceae         | <i>Adenanthera pavonina</i>     | <i>Saga</i>            | 2  | 2  | 0.053 | 1  | 0.026 |
| 24 | Fag_1        | Fagaceae         | <i>Lithocarpus</i> sp.          | <i>Berangan</i>        | 2  | 5  | 0.132 | 3  | 0.079 |
| 25 | Fag_2        | Fagaceae         | <i>Lithocarpus blumeanus</i>    | <i>Kabal</i>           | 2  | 2  | 0.053 | 1  | 0.026 |
| 26 | Hyp_1        | Hypericaceae     | <i>Cratoxylum glaucum</i>       | <i>Gerunggang</i>      | 4  | 19 | 0.500 | 10 | 0.263 |
| 27 | Lam_1        | Lamiaceae        | <i>Vitex pubescens</i>          | <i>Tuek</i>            | 1  | 1  | 0.026 | 1  | 0.026 |
| 28 | Lau_1        | Lauraceae        | <i>Cryptocarya</i> sp.          | <i>Medang</i>          | 4  | 35 | 0.921 | 17 | 0.447 |
| 29 | Lau_2        | Lauraceae        | <i>Cryptocarya densiflora</i>   | <i>Medang Beliling</i> | 2  | 12 | 0.316 | 11 | 0.289 |
| 30 | Lau_3        | Lauraceae        | <i>Lindera lucida</i>           | <i>Medang miang</i>    | 2  | 16 | 0.421 | 11 | 0.289 |
| 31 | Lau_4        | Lauraceae        | <i>Litsea accedens</i>          | <i>Medang Perawas</i>  | 2  | 5  | 0.132 | 3  | 0.079 |
| 32 | Lec_1        | Lecythidaceae    | <i>Barringtonia reticulata</i>  | <i>Putat</i>           | 2  | 2  | 0.053 | 1  | 0.026 |
| 33 | Mal_1        | Malvaceae        | <i>Hibiscus tiliaceus</i>       | <i>Barok</i>           | 1  | 4  | 0.105 | 4  | 0.105 |
| 34 | Mal_2        | Malvaceae        | <i>Commersonia bartramia</i>    | <i>Mentenuk</i>        | 2  | 2  | 0.053 | 1  | 0.026 |
| 35 | Mal_3        | Malvaceae        | <i>Pterospermum javanicum</i>   | <i>Nyire</i>           | 2  | 2  | 0.053 | 1  | 0.026 |
| 36 | Mels_1       | Melastomataceae  | <i>Melastoma malabathricum</i>  | <i>Keletak'en</i>      | 1  | 1  | 0.026 | 1  | 0.026 |

|    |         |                |                                                |                    |   |    |       |    |       |
|----|---------|----------------|------------------------------------------------|--------------------|---|----|-------|----|-------|
| 37 | Mor_1   | Moraceae       | <i>Ficus sundaica</i>                          | Jawi               | 1 | 1  | 0.026 | 1  | 0.026 |
| 38 | Myrt_1  | Myrtaceae      | <i>Syzygium</i> cf.<br><i>Calophyllifolium</i> | Arang-arang        | 4 | 6  | 0.158 | 3  | 0.079 |
| 39 | Myrt_2  | Myrtaceae      | <i>Eugenia foxworthiana</i>                    | Asau               | 3 | 3  | 0.079 | 1  | 0.026 |
| 40 | Myrt_03 | Myrtaceae      | <i>Syzygium</i><br><i>acuminatissima</i>       | Cingkang           | 2 | 3  | 0.079 | 2  | 0.053 |
| 41 | Myrt_04 | Myrtaceae      | <i>Melaleuca cajuputi</i>                      | Gelam              | 4 | 35 | 0.921 | 16 | 0.421 |
| 42 | Myrt_05 | Myrtaceae      | <i>Rhodamnia cinerea</i>                       | Jemang             | 3 | 9  | 0.237 | 5  | 0.132 |
| 43 | Myrt_06 | Myrtaceae      | <i>Syzygium racemosum</i>                      | Mantuy             | 3 | 7  | 0.184 | 4  | 0.105 |
| 44 | Myrt_07 | Myrtaceae      | <i>Syzygium zeylanicum</i>                     | Nasi-nasi          | 2 | 2  | 0.053 | 1  | 0.026 |
| 45 | Myrt_08 | Myrtaceae      | <i>Tristaniaopsis obovata</i>                  | Pelawan            | 5 | 20 | 0.526 | 9  | 0.237 |
| 46 | Myrt_09 | Myrtaceae      | <i>Syzygium urceolatum</i>                     | Samak              | 6 | 60 | 1.579 | 28 | 0.737 |
| 47 | Myrt_10 | Myrtaceae      | <i>Syzygium</i><br><i>acuminatissima</i>       | Sapat              | 4 | 5  | 0.132 | 2  | 0.053 |
| 48 | Myrt_11 | Myrtaceae      | <i>Baeckea frutescens</i>                      | Sapu-sapu          | 4 | 8  | 0.211 | 4  | 0.105 |
| 49 | Myrt_12 | Myrtaceae      | <i>Leptospermum</i><br><i>polygalifolium</i>   | Sekuncong          | 3 | 3  | 0.079 | 1  | 0.026 |
| 50 | Myrt_13 | Myrtaceae      | <i>Syzygium rostratum</i>                      | Sicel              | 2 | 2  | 0.053 | 1  | 0.026 |
| 51 | Myrt_14 | Myrtaceae      | <i>Syzygium bankense</i>                       | Sudong<br>pelanduk | 3 | 4  | 0.105 | 2  | 0.053 |
| 52 | Myrt_15 | Myrtaceae      | <i>Syzygium muelleri</i>                       | Ubar               | 1 | 2  | 0.053 | 2  | 0.053 |
| 53 | Mys_1   | Myristicaceae  | <i>Knea cinerea</i>                            | Naran              | 2 | 2  | 0.053 | 1  | 0.026 |
| 54 | Phyl_1  | Phyllanthaceae | <i>Aporosa frutescens</i>                      | Pelangas           | 2 | 23 | 0.605 | 19 | 0.500 |
| 55 | Pod_1   | Podocarpaceae  | <i>Podocarpus neriifolius</i>                  | Punyuk             | 2 | 4  | 0.105 | 3  | 0.079 |
| 56 | Prim_1  | Primulaceae    | <i>Ardisia haseltii</i>                        | Ubi-ubi            | 2 | 2  | 0.053 | 1  | 0.026 |
| 57 | Pro_1   | Proteaceae     | <i>Helicia robusta</i>                         | Mengkikir          | 2 | 7  | 0.184 | 5  | 0.132 |
| 58 | Rhi_1   | Rhizophoraceae | <i>Bruguiera sexangula</i>                     | Tumok              | 2 | 4  | 0.105 | 3  | 0.079 |
| 59 | Rub_1   | Rubiaceae      | <i>Coptosapelta tomentosa</i>                  | Akar gendai        | 3 | 3  | 0.079 | 1  | 0.026 |
| 60 | Rut_1   | Rutaceae       | <i>Melicope denhamii</i>                       | Sengulang          | 2 | 4  | 0.105 | 3  | 0.079 |
| 61 | Sap_1   | Sapindaceae    | <i>Guioa diplopetala</i>                       | Pulas              | 6 | 27 | 0.711 | 16 | 0.421 |
| 62 | Sym_1   | Symplocaceae   | <i>Symplocos adenophylla</i>                   | Mendiramen         | 2 | 2  | 0.053 | 1  | 0.026 |
| 63 | The_1   | Theaceae       | <i>Eurya acuminata</i>                         | Salah              | 2 | 2  | 0.053 | 1  | 0.026 |
| 64 | The_2   | Theaceae       | <i>Schima wallichii</i>                        | Seruk              | 4 | 19 | 0.500 | 9  | 0.237 |
| 65 | Thy_1   | Thymelaeaceae  | <i>Wikstroemia</i><br><i>androsaemifolia</i>   | Bentak             | 3 | 3  | 0.079 | 1  | 0.026 |

**Table S5.** (a) The species use for *sunggau* (based on interview and field observation) and (b) species composition (based on vegetation analysis) at the three forest types (HF = Heath forest, SHF = Swamp heath forest, MF = Mangrove forest) in Perpat, Kembiri, and Tanjung Rusa Villages, (a: 1= cited used for sunggau, 0= not cited used for sunggau; b: 1=present, 0=absent).

| No | Local name          | Species                              | a. Species used for <i>sunggau</i> |     |    |         |    |                                         |     |                                      | b. Species composition |        |     |    |         |    |                                         |     |                                      |    |
|----|---------------------|--------------------------------------|------------------------------------|-----|----|---------|----|-----------------------------------------|-----|--------------------------------------|------------------------|--------|-----|----|---------|----|-----------------------------------------|-----|--------------------------------------|----|
|    |                     |                                      | Perpat                             |     |    | Kembiri |    | Tanjung Rusa - Belitung Island (TR-Bel) |     | Tanjung Rusa -Kampak Island (TR-Kam) |                        | Perpat |     |    | Kembiri |    | Tanjung Rusa - Belitung Island (TR-Bel) |     | Tanjung Rusa -Kampak Island (TR-Kam) |    |
|    |                     |                                      | HF                                 | SHF | MF | SHF     | MF | HF                                      | SHF | HF                                   | MF                     | HF     | SHF | MF | SHF     | MF | HF                                      | SHF | SHF                                  | MF |
| 1  | Akar gendai         | <i>Coptosapelta tomentosa</i>        | 0                                  | 0   | 0  | 0       | 0  | 0                                       | 0   | 0                                    | 0                      | 1      | 0   | 0  | 0       | 0  | 0                                       | 0   | 0                                    | 0  |
| 2  | Akar lambai         | <i>Ampelocissus thyrsoiflora</i>     | 0                                  | 0   | 0  | 0       | 0  | 0                                       | 0   | 0                                    | 0                      | 1      | 0   | 0  | 0       | 0  | 0                                       | 0   | 0                                    | 0  |
| 3  | Akar raru / entuben | <i>Derris elliptica</i>              | 0                                  | 0   | 0  | 0       | 0  | 0                                       | 0   | 0                                    | 0                      | 1      | 0   | 0  | 0       | 0  | 0                                       | 0   | 0                                    | 0  |
| 4  | Akar sp 1           | <i>Aeschynanthus cf. horsfieldii</i> | 0                                  | 0   | 0  | 0       | 0  | 0                                       | 0   | 0                                    | 0                      | 0      | 0   | 0  | 1       | 0  | 0                                       | 0   | 0                                    | 0  |
| 5  | Akar Sp 2           | <i>Oldenlandia biflora</i>           | 0                                  | 0   | 0  | 0       | 0  | 0                                       | 0   | 0                                    | 0                      | 1      | 0   | 0  | 1       | 0  | 0                                       | 0   | 0                                    | 0  |
| 6  | Akar tengkel        | <i>Gnetum cuspidatum</i>             | 0                                  | 0   | 0  | 0       | 0  | 0                                       | 0   | 0                                    | 0                      | 1      | 0   | 0  | 0       | 0  | 0                                       | 0   | 0                                    | 0  |
| 7  | Akasia              | <i>Acacia mangium</i>                | 0                                  | 0   | 0  | 0       | 0  | 0                                       | 0   | 0                                    | 0                      | 0      | 0   | 0  | 0       | 0  | 1                                       | 0   | 0                                    | 0  |
| 8  | Alu-alu             | <i>Styphelia malayana</i>            | 0                                  | 0   | 0  | 0       | 0  | 0                                       | 0   | 0                                    | 0                      | 1      | 0   | 0  | 1       | 0  | 0                                       | 0   | 1                                    | 0  |
| 9  | Ambong-ambong       | <i>Glochidion arborescens</i>        | 0                                  | 0   | 0  | 0       | 0  | 0                                       | 0   | 0                                    | 0                      | 0      | 0   | 0  | 1       | 0  | 0                                       | 0   | 0                                    | 0  |
| 10 | Anggrek             | <i>Bromheadia finlaysoniana</i>      | 0                                  | 0   | 0  | 0       | 0  | 0                                       | 0   | 0                                    | 0                      | 1      | 0   | 0  | 0       | 0  | 0                                       | 0   | 0                                    | 0  |
| 11 | Api-api             | <i>Avicena alba</i>                  | 0                                  | 0   | 0  | 0       | 0  | 0                                       | 0   | 0                                    | 0                      | 0      | 0   | 0  | 0       | 0  | 0                                       | 0   | 0                                    | 1  |
| 12 | Ara'                | <i>Ficus variegata</i>               | 0                                  | 0   | 0  | 0       | 0  | 0                                       | 0   | 0                                    | 0                      | 0      | 0   | 0  | 1       | 1  | 0                                       | 0   | 0                                    | 0  |
| 13 | Ara sp. (1)         | <i>Ficus fulva</i>                   | 0                                  | 0   | 0  | 0       | 0  | 0                                       | 0   | 0                                    | 0                      | 1      | 0   | 0  | 0       | 0  | 0                                       | 0   | 0                                    | 0  |
| 14 | Arang-arang batang  | <i>Syzygium cf. Calophyllifolium</i> | 1                                  | 0   | 0  | 0       | 0  | 1                                       | 0   | 0                                    | 0                      | 1      | 1   | 0  | 1       | 0  | 0                                       | 0   | 1                                    | 0  |
| 15 | Arang-arang padang  | <i>Eugenia leptantha</i>             | 1                                  | 0   | 0  | 0       | 0  | 0                                       | 0   | 0                                    | 0                      | 1      | 1   | 0  | 1       | 0  | 0                                       | 0   | 0                                    | 0  |
| 16 | Asau                | <i>Syzygium foxworthianum</i>        | 1                                  | 0   | 0  | 0       | 0  | 1                                       | 0   | 0                                    | 0                      | 0      | 0   | 0  | 1       | 0  | 1                                       | 0   | 0                                    | 0  |
| 17 | Bakau               | <i>Bruguiera gymnorhiza</i>          | 0                                  | 0   | 0  | 0       | 0  | 0                                       | 0   | 0                                    | 0                      | 0      | 0   | 1  | 0       | 1  | 0                                       | 0   | 0                                    | 1  |
| 18 | Balangeran          | <i>Shorea balangeran</i>             | 1                                  | 0   | 0  | 1       | 0  | 0                                       | 0   | 0                                    | 0                      | 1      | 1   | 0  | 0       | 0  | 0                                       | 0   | 1                                    | 0  |
| 19 | Bansa'              | <i>Baccaurea idlexa</i>              | 1                                  | 0   | 0  | 0       | 0  | 0                                       | 0   | 0                                    | 0                      | 0      | 1   | 0  | 0       | 0  | 0                                       | 1   | 1                                    | 0  |
| 20 | Bentak              | <i>Wikstroemia androsaemifolia</i>   | 0                                  | 0   | 0  | 0       | 0  | 0                                       | 0   | 0                                    | 0                      | 0      | 1   | 0  | 1       | 0  | 0                                       | 0   | 0                                    | 0  |



|    |                   |                                             |   |   |   |   |   |   |   |   |   |   |   |   |   |   |   |   |   |
|----|-------------------|---------------------------------------------|---|---|---|---|---|---|---|---|---|---|---|---|---|---|---|---|---|
| 21 | Berangan dangkal  | <i>Elaeocarpus sundaicus</i>                | 1 | 0 | 0 | 1 | 0 | 0 | 0 | 0 | 0 | 1 | 0 | 0 | 0 | 0 | 0 | 0 | 0 |
| 22 | Berangan duri     | <i>Castanopsis costata</i>                  | 0 | 0 | 0 | 0 | 0 | 0 | 0 | 0 | 0 | 1 | 0 | 0 | 0 | 0 | 0 | 0 | 0 |
| 23 | Beras             | <i>Urophyllum</i> sp.                       | 0 | 0 | 0 | 0 | 0 | 0 | 0 | 0 | 0 | 0 | 1 | 0 | 0 | 0 | 0 | 0 | 0 |
| 24 | Beringin          | <i>Ficus benjamina</i>                      | 1 | 0 | 1 | 0 | 0 | 1 | 0 | 0 | 0 | 1 | 0 | 0 | 0 | 0 | 0 | 0 | 0 |
| 25 | Betek / Nasi-nasi | <i>Syzygium zeylanicum</i>                  | 1 | 0 | 0 | 0 | 0 | 1 | 0 | 0 | 0 | 1 | 1 | 0 | 1 | 0 | 1 | 0 | 0 |
| 26 | Betor belulang    | <i>Calophyllum lanigerum</i>                | 1 | 0 | 0 | 1 | 0 | 1 | 0 | 1 | 0 | 1 | 1 | 0 | 1 | 0 | 1 | 1 | 0 |
| 27 | Betor padi        | <i>Calophyllum pulcherrimum</i>             | 1 | 0 | 1 | 1 | 0 | 1 | 0 | 1 | 0 | 1 | 0 | 0 | 1 | 0 | 0 | 0 | 0 |
| 28 | Betor rambai      | <i>Calophyllum calaba</i>                   | 1 | 0 | 0 | 1 | 0 | 0 | 0 | 0 | 0 | 1 | 0 | 0 | 0 | 0 | 0 | 0 | 0 |
| 29 | Bunga hoya        | <i>Dendrotrophe varians</i>                 | 0 | 0 | 0 | 0 | 0 | 0 | 0 | 0 | 0 | 1 | 0 | 0 | 0 | 0 | 0 | 0 | 0 |
| 30 | Butak             | <i>Excoecaria agallocha</i>                 | 0 | 0 | 0 | 1 | 0 | 0 | 0 | 0 | 0 | 0 | 0 | 0 | 0 | 1 | 0 | 0 | 0 |
| 31 | Dungon laut       | <i>Heritiera littoralis</i>                 | 0 | 0 | 0 | 0 | 0 | 0 | 0 | 0 | 0 | 0 | 0 | 0 | 0 | 1 | 0 | 0 | 1 |
| 32 | Empenai darat     | <i>Barringtonia</i> sp.                     | 0 | 0 | 0 | 0 | 0 | 0 | 0 | 0 | 0 | 0 | 0 | 0 | 1 | 0 | 0 | 0 | 0 |
| 33 | Empenai laut      | <i>Ardisia lanceolata</i>                   | 0 | 0 | 0 | 0 | 0 | 0 | 0 | 0 | 0 | 0 | 0 | 0 | 0 | 1 | 0 | 0 | 1 |
| 34 | Empiai            | <i>Acrostichum speciosum</i>                | 0 | 0 | 0 | 0 | 0 | 0 | 0 | 0 | 0 | 0 | 0 | 0 | 0 | 0 | 0 | 0 | 0 |
| 35 | Enceruaian        | <i>Urophyllum arboreum</i>                  | 0 | 0 | 0 | 0 | 0 | 0 | 0 | 0 | 0 | 1 | 0 | 0 | 0 | 0 | 0 | 0 | 0 |
| 36 | Enciriten         | <i>Salacia grandifolia</i>                  | 0 | 0 | 0 | 0 | 0 | 0 | 0 | 0 | 0 | 1 | 0 | 0 | 0 | 0 | 1 | 1 | 0 |
| 37 | Engkelingan       | <i>Syzygium syzygioides</i>                 | 0 | 0 | 0 | 0 | 0 | 0 | 0 | 0 | 0 | 1 | 0 | 0 | 0 | 0 | 1 | 0 | 0 |
| 38 | Engkurai padang   | <i>Eriocaulon willdenovianum</i>            | 0 | 0 | 0 | 0 | 0 | 0 | 0 | 0 | 0 | 0 | 0 | 0 | 1 | 0 | 0 | 0 | 0 |
| 39 | Entenuk           | <i>Commersonia bartramia</i>                | 0 | 0 | 0 | 1 | 0 | 0 | 0 | 0 | 0 | 0 | 0 | 0 | 0 | 0 | 1 | 1 | 0 |
| 40 | Gading            | <i>Memecylon</i> cf. <i>acuminatissimum</i> | 0 | 0 | 0 | 0 | 0 | 0 | 0 | 0 | 0 | 1 | 0 | 0 | 0 | 0 | 0 | 0 | 0 |
| 41 | Gelam             | <i>Melaleuca cajuputi</i>                   | 1 | 1 | 1 | 1 | 1 | 1 | 1 | 0 | 0 | 0 | 1 | 1 | 1 | 0 | 1 | 0 | 0 |
| 42 | Gelam tikus       | <i>Eugenia cerina</i>                       | 0 | 0 | 0 | 0 | 0 | 0 | 0 | 0 | 0 | 1 | 0 | 0 | 0 | 0 | 0 | 1 | 0 |
| 43 | Gerunggang        | <i>Cratoxylum glaucum</i>                   | 1 | 1 | 1 | 1 | 0 | 1 | 1 | 1 | 0 | 1 | 1 | 0 | 1 | 0 | 0 | 0 | 0 |
| 44 | Geruta            | <i>Dicranopteris linearis</i>               | 0 | 0 | 0 | 0 | 0 | 0 | 0 | 0 | 0 | 0 | 0 | 0 | 1 | 0 | 0 | 0 | 0 |
| 45 | Iding-iding       | <i>Stenochlaena palustris</i>               | 0 | 0 | 0 | 0 | 0 | 0 | 0 | 0 | 0 | 0 | 0 | 0 | 1 | 0 | 0 | 0 | 0 |
| 46 | Ijar-ijar         | <i>Nephrolepis</i> sp.                      | 0 | 0 | 0 | 0 | 0 | 0 | 0 | 0 | 0 | 0 | 0 | 0 | 1 | 0 | 0 | 0 | 0 |
| 47 | Jemang            | <i>Rhodammia cinerea</i>                    | 1 | 0 | 1 | 1 | 0 | 0 | 1 | 0 | 1 | 0 | 1 | 0 | 1 | 0 | 1 | 1 | 0 |
| 48 | Kandis bini       | <i>Garcinia parvifolia</i>                  | 0 | 0 | 0 | 0 | 0 | 0 | 0 | 0 | 0 | 0 | 0 | 0 | 1 | 0 | 0 | 0 | 0 |

|    |                |                                |   |   |   |   |   |   |   |   |   |   |   |   |   |   |   |   |   |   |
|----|----------------|--------------------------------|---|---|---|---|---|---|---|---|---|---|---|---|---|---|---|---|---|---|
| 49 | Kandis laki    | <i>Garcinia lateriflora</i>    | 0 | 0 | 0 | 0 | 0 | 0 | 0 | 0 | 0 | 0 | 0 | 0 | 1 | 0 | 0 | 0 | 0 | 0 |
| 50 | Karet          | <i>Hevea brasiliensis</i>      | 0 | 0 | 0 | 0 | 0 | 0 | 0 | 0 | 0 | 0 | 0 | 0 | 0 | 0 | 1 | 0 | 0 | 0 |
| 51 | Kayu hijau     | <i>Claoxylon longifolium</i>   | 0 | 0 | 0 | 0 | 0 | 0 | 0 | 0 | 0 | 1 | 0 | 0 | 1 | 0 | 0 | 0 | 0 | 0 |
| 52 | Kayu lawang    | <i>Eurycoma longifolia</i>     | 0 | 0 | 0 | 0 | 0 | 0 | 0 | 0 | 0 | 1 | 0 | 0 | 0 | 0 | 0 | 0 | 0 | 0 |
| 53 | Kelemunyan     | <i>Epipremnum aureum</i>       | 0 | 0 | 0 | 0 | 0 | 0 | 0 | 0 | 0 | 0 | 0 | 0 | 1 | 0 | 0 | 0 | 0 | 0 |
| 54 | Keletakan      | <i>Melastoma malabathricum</i> | 0 | 1 | 0 | 1 | 0 | 0 | 0 | 0 | 0 | 0 | 0 | 0 | 0 | 0 | 1 | 1 | 1 | 1 |
| 55 | Kelinsut       | <i>Syzygium decipiens</i>      | 0 | 0 | 0 | 0 | 0 | 0 | 0 | 0 | 0 | 0 | 0 | 0 | 1 | 0 | 0 | 0 | 0 | 0 |
| 56 | Kelumpang      | <i>Sterculia cf. foetida</i>   | 0 | 0 | 0 | 0 | 0 | 0 | 0 | 0 | 0 | 0 | 0 | 0 | 1 | 0 | 0 | 0 | 0 | 0 |
| 57 | Keremunting    | <i>Rhodomyrtus tomentosa</i>   | 0 | 0 | 0 | 0 | 0 | 0 | 0 | 0 | 0 | 0 | 1 | 0 | 1 | 0 | 1 | 0 | 1 | 0 |
| 58 | Kernipong      | <i>Albizia procera</i>         | 0 | 0 | 0 | 0 | 0 | 0 | 0 | 0 | 0 | 0 | 0 | 0 | 1 | 0 | 0 | 0 | 1 | 0 |
| 59 | Ketakong       | <i>Nepenthes reinwardtiana</i> | 0 | 0 | 0 | 0 | 0 | 0 | 0 | 0 | 0 | 1 | 0 | 0 | 0 | 0 | 0 | 0 | 0 | 0 |
| 60 | Kiras          | <i>Garcinia celebica</i>       | 0 | 0 | 0 | 0 | 0 | 0 | 0 | 0 | 0 | 1 | 1 | 0 | 1 | 0 | 1 | 0 | 1 | 0 |
| 61 | Krikisen       | <i>Lhytocarpus bancanus</i>    | 0 | 0 | 0 | 0 | 0 | 0 | 0 | 0 | 0 | 0 | 1 | 0 | 0 | 0 | 0 | 0 | 0 | 0 |
| 62 | Kunyanyanyi    | <i>Ficus punctata</i>          | 0 | 0 | 0 | 0 | 0 | 0 | 0 | 0 | 0 | 0 | 0 | 0 | 1 | 0 | 0 | 0 | 0 | 0 |
| 63 | Ladek          | <i>Pternandra coerulescens</i> | 0 | 0 | 0 | 0 | 0 | 0 | 0 | 0 | 0 | 1 | 1 | 0 | 1 | 0 | 0 | 0 | 0 | 0 |
| 64 | Layak          | <i>Gnetum gnemonoides</i>      | 0 | 0 | 0 | 0 | 0 | 0 | 0 | 0 | 0 | 1 | 0 | 0 | 0 | 0 | 0 | 0 | 0 | 0 |
| 65 | Leban          | <i>Vitex pinnata</i>           | 0 | 0 | 0 | 0 | 0 | 0 | 0 | 0 | 0 | 1 | 0 | 0 | 1 | 0 | 1 | 1 | 0 | 0 |
| 66 | Lepang         | <i>Alpinia oxymitra</i>        | 0 | 0 | 0 | 0 | 0 | 0 | 0 | 0 | 0 | 1 | 1 | 0 | 1 | 1 | 0 | 0 | 0 | 0 |
| 67 | Liana          | <i>Dentella repens</i>         | 0 | 0 | 0 | 0 | 0 | 0 | 0 | 0 | 0 | 1 | 0 | 0 | 0 | 0 | 0 | 0 | 0 | 0 |
| 68 | Libut          | <i>Macaranga hosei</i>         | 0 | 0 | 0 | 0 | 0 | 0 | 0 | 0 | 0 | 0 | 0 | 0 | 1 | 0 | 0 | 0 | 0 | 0 |
| 69 | Malam/Tenam    | <i>Psychotria malayana</i>     | 0 | 0 | 0 | 0 | 0 | 0 | 0 | 0 | 0 | 1 | 1 | 0 | 1 | 1 | 1 | 0 | 0 | 0 |
| 70 | Malih          | <i>Leea aculeata</i>           | 0 | 1 | 0 | 0 | 0 | 0 | 0 | 0 | 0 | 0 | 0 | 0 | 1 | 0 | 0 | 0 | 0 | 0 |
| 71 | Malong         | <i>Calophyllum soulattri</i>   | 0 | 0 | 0 | 1 | 0 | 0 | 0 | 0 | 0 | 0 | 0 | 0 | 1 | 0 | 0 | 0 | 0 | 0 |
| 72 | Mampat         | <i>Cratoxylum formosus</i>     | 0 | 0 | 0 | 0 | 0 | 1 | 0 | 0 | 0 | 1 | 0 | 0 | 1 | 0 | 0 | 1 | 0 | 0 |
| 73 | Mantaan        | <i>Lepisanthes amoena</i>      | 0 | 0 | 0 | 0 | 0 | 0 | 0 | 0 | 0 | 1 | 0 | 0 | 0 | 0 | 1 | 1 | 0 | 0 |
| 74 | Mantuyan       | <i>Syzygium racemosum</i>      | 0 | 0 | 0 | 1 | 0 | 1 | 0 | 0 | 0 | 1 | 1 | 0 | 1 | 0 | 1 | 0 | 0 | 0 |
| 75 | Medang miang   | <i>Lindera lucida</i>          | 1 | 0 | 0 | 1 | 0 | 1 | 0 | 0 | 0 | 1 | 0 | 0 | 1 | 0 | 1 | 1 | 0 | 0 |
| 76 | Medang perawas | <i>Litsea accedens</i>         | 0 | 0 | 0 | 1 | 0 | 1 | 0 | 0 | 0 | 1 | 0 | 0 | 0 | 0 | 0 | 0 | 0 | 0 |
| 77 | Melak          | <i>Garcinia bancana</i>        | 1 | 1 | 0 | 0 | 0 | 0 | 0 | 0 | 0 | 1 | 1 | 0 | 0 | 0 | 0 | 0 | 1 | 0 |

|     |                    |                                 |   |   |   |   |   |   |   |   |   |   |   |   |   |   |   |   |   |   |
|-----|--------------------|---------------------------------|---|---|---|---|---|---|---|---|---|---|---|---|---|---|---|---|---|---|
| 78  | Melukan            | <i>Syzygium palembanicum</i>    | 1 | 0 | 0 | 1 | 0 | 0 | 0 | 0 | 0 | 0 | 1 | 0 | 1 | 0 | 0 | 0 | 0 | 0 |
| 79  | Mengkikir          | <i>Helicia robusta</i>          | 1 | 0 | 0 | 1 | 0 | 1 | 0 | 0 | 0 | 0 | 1 | 0 | 1 | 0 | 0 | 0 | 1 | 0 |
| 80  | Mensirak           | <i>Ilex cymosa</i>              | 1 | 0 | 0 | 1 | 0 | 1 | 0 | 0 | 0 | 1 | 0 | 0 | 1 | 0 | 0 | 1 | 0 | 0 |
| 81  | Mentepong          | <i>Strobocalyx arborea</i>      | 1 | 0 | 0 | 1 | 0 | 0 | 0 | 0 | 0 | 0 | 0 | 0 | 1 | 0 | 0 | 0 | 0 | 0 |
| 82  | Moel               | <i>Diospyros ridleyi</i>        | 0 | 0 | 0 | 0 | 0 | 0 | 0 | 0 | 0 | 1 | 0 | 0 | 1 | 0 | 0 | 0 | 0 | 0 |
| 83  | Nangsi/Serkik      | <i>Planchonella obovata</i>     | 0 | 0 | 0 | 1 | 0 | 0 | 0 | 0 | 0 | 1 | 1 | 0 | 0 | 0 | 0 | 0 | 0 | 0 |
| 84  | Naran              | <i>Knema cinerea</i>            | 1 | 0 | 0 | 0 | 0 | 0 | 0 | 0 | 0 | 1 | 0 | 0 | 0 | 0 | 0 | 0 | 0 | 0 |
| 85  | Sp 1               | <i>Pterospermum javanicum</i>   | 0 | 0 | 0 | 0 | 0 | 0 | 0 | 0 | 0 | 0 | 0 | 0 | 0 | 0 | 0 | 0 | 0 | 1 |
| 86  | Niramen            | <i>Symplocos adenophylla</i>    | 0 | 0 | 0 | 0 | 0 | 1 | 0 | 0 | 0 | 1 | 0 | 0 | 0 | 0 | 0 | 0 | 0 | 0 |
| 87  | Nudong             | <i>Antidesma cuspidatum</i>     | 0 | 0 | 0 | 0 | 0 | 0 | 0 | 0 | 0 | 0 | 0 | 0 | 1 | 0 | 0 | 1 | 0 | 1 |
| 88  | Nunok              | <i>Ficus curtipes</i>           | 0 | 0 | 0 | 0 | 0 | 0 | 0 | 0 | 0 | 0 | 0 | 0 | 1 | 0 | 0 | 0 | 0 | 0 |
| 89  | Nyelak bulat       | <i>Scleria</i> sp.              | 0 | 0 | 0 | 0 | 0 | 0 | 0 | 0 | 0 | 0 | 0 | 0 | 1 | 0 | 0 | 0 | 0 | 0 |
| 90  | Nyire              | <i>Xylocarpus granatum</i>      | 0 | 0 | 0 | 1 | 1 | 0 | 0 | 0 | 0 | 0 | 0 | 1 | 0 | 1 | 0 | 0 | 0 | 0 |
| 91  | Pandan laut        | <i>Pandanus tectorius</i>       | 0 | 0 | 0 | 0 | 0 | 0 | 0 | 0 | 0 | 0 | 0 | 0 | 0 | 0 | 0 | 0 | 0 | 1 |
| 92  | Pao                | <i>Buchanania arborescens</i>   | 0 | 0 | 0 | 1 | 0 | 0 | 1 | 0 | 0 | 1 | 0 | 0 | 0 | 0 | 0 | 0 | 0 | 0 |
| 93  | Pelangas           | <i>Aporosa frutescens</i>       | 1 | 0 | 0 | 1 | 0 | 1 | 0 | 0 | 0 | 0 | 0 | 0 | 1 | 0 | 1 | 1 | 0 | 0 |
| 94  | Pelawan            | <i>Tristanopsis obovata</i>     | 1 | 1 | 0 | 1 | 0 | 1 | 1 | 0 | 0 | 1 | 1 | 0 | 1 | 0 | 1 | 1 | 1 | 0 |
| 95  | Pelawan kupor      | <i>Tristanopsis whiteana</i>    | 0 | 0 | 0 | 0 | 0 | 0 | 0 | 0 | 0 | 1 | 0 | 0 | 0 | 0 | 0 | 0 | 0 | 0 |
| 96  | Pelempang hitam    | <i>Adinandra dumosa</i>         | 1 | 0 | 0 | 0 | 0 | 0 | 0 | 0 | 0 | 1 | 1 | 0 | 1 | 0 | 1 | 0 | 1 | 0 |
| 97  | Pelepak            | <i>Hopea bilitonensis</i>       | 1 | 0 | 0 | 1 | 0 | 1 | 0 | 0 | 0 | 1 | 0 | 0 | 1 | 0 | 0 | 0 | 0 | 0 |
| 98  | Pelepak daun besar | <i>Inocarpus fagifer</i>        | 0 | 0 | 0 | 0 | 0 | 0 | 0 | 0 | 0 | 1 | 0 | 0 | 0 | 0 | 0 | 0 | 0 | 0 |
| 99  | Pelempang putih    | <i>Eurya glabra</i>             | 1 | 0 | 0 | 0 | 0 | 0 | 0 | 0 | 0 | 1 | 0 | 0 | 0 | 0 | 0 | 1 | 0 | 0 |
| 100 | Perupok            | <i>Lepisanthes alata</i>        | 0 | 0 | 0 | 0 | 0 | 0 | 0 | 0 | 0 | 0 | 0 | 0 | 1 | 0 | 0 | 0 | 0 | 0 |
| 101 | Pulas              | <i>Guioa diplopetala</i>        | 1 | 0 | 0 | 1 | 0 | 0 | 1 | 0 | 0 | 1 | 1 | 0 | 0 | 0 | 1 | 0 | 0 | 0 |
| 102 | Punyok             | <i>Podocarpus neriifolius</i>   | 0 | 0 | 1 | 1 | 0 | 0 | 0 | 0 | 0 | 0 | 0 | 1 | 0 | 0 | 0 | 0 | 0 | 1 |
| 103 | Purang             | <i>Macaranga triloba</i>        | 0 | 0 | 0 | 0 | 0 | 0 | 0 | 0 | 0 | 0 | 0 | 0 | 1 | 0 | 0 | 0 | 0 | 0 |
| 104 | Putat              | <i>Barringtonia reticulata</i>  | 0 | 0 | 0 | 1 | 0 | 0 | 0 | 0 | 0 | 0 | 0 | 0 | 1 | 0 | 0 | 0 | 0 | 0 |
| 105 | Rarak              | <i>Neouvaria acuminatissima</i> | 0 | 0 | 0 | 0 | 0 | 0 | 0 | 0 | 0 | 0 | 0 | 0 | 1 | 0 | 0 | 1 | 0 | 0 |
| 106 | Rautan             | <i>Calamus caesius</i>          | 0 | 0 | 0 | 1 | 0 | 0 | 0 | 0 | 0 | 0 | 1 | 0 | 0 | 0 | 0 | 0 | 0 | 0 |

[illegible]

|     |                 |                                |    |    |   |    |   |    |   |   |   |    |    |   |    |    |    |    |    |    |
|-----|-----------------|--------------------------------|----|----|---|----|---|----|---|---|---|----|----|---|----|----|----|----|----|----|
| 135 | Perai           | <i>Vaccinium bracteatum</i>    | 0  | 0  | 0 | 0  | 0 | 0  | 0 | 0 | 0 | 0  | 0  | 0 | 0  | 0  | 0  | 0  | 1  | 0  |
| 136 | Kantung Semar   | <i>Nepenthes mirabilis</i>     | 0  | 0  | 0 | 0  | 0 | 0  | 0 | 0 | 0 | 0  | 0  | 0 | 0  | 0  | 0  | 0  | 1  | 0  |
| 137 | Jawi            | <i>Ficus sundaica</i>          | 0  | 0  | 0 | 1  | 0 | 0  | 0 | 0 | 0 | 0  | 0  | 0 | 0  | 0  | 0  | 0  | 0  | 0  |
| 138 | Kemantut        | <i>Microcos tomentosa</i>      | 0  | 0  | 0 | 0  | 0 | 0  | 0 | 0 | 0 | 0  | 1  | 0 | 0  | 0  | 0  | 1  | 0  | 0  |
| 139 | Juluk antu      | <i>Arthrophyllum javanicum</i> | 0  | 0  | 0 | 0  | 0 | 1  | 0 | 0 | 0 | 0  | 0  | 0 | 0  | 0  | 1  | 1  | 0  | 0  |
| 140 | Salah           | <i>Eurya acuminata</i>         | 1  | 0  | 0 | 0  | 0 | 1  | 0 | 0 | 0 | 0  | 0  | 0 | 0  | 0  | 0  | 1  | 0  | 0  |
| 141 | Sawit           | <i>Elaeis guineensis</i>       | 0  | 0  | 0 | 0  | 0 | 0  | 0 | 0 | 0 | 0  | 0  | 0 | 0  | 0  | 1  | 0  | 0  | 0  |
| 142 | Entepong        | <i>Vernonia arborea</i>        | 0  | 0  | 0 | 0  | 0 | 0  | 0 | 0 | 0 | 0  | 0  | 0 | 0  | 0  | 0  | 1  | 0  | 0  |
| 143 | Sengon          | <i>Albicia</i> sp.             | 0  | 0  | 0 | 0  | 0 | 0  | 0 | 0 | 0 | 0  | 0  | 0 | 0  | 0  | 0  | 0  | 1  | 0  |
| 144 | Kemiri          | <i>Aleurites moluccana</i> .   | 0  | 0  | 0 | 0  | 0 | 0  | 0 | 0 | 0 | 0  | 0  | 0 | 0  | 0  | 1  | 0  | 0  | 0  |
| 145 | Amin Ambong     | <i>Gliricidea sepium</i>       | 0  | 0  | 0 | 0  | 0 | 0  | 0 | 0 | 0 | 0  | 0  | 0 | 0  | 0  | 1  | 0  | 0  | 0  |
| 146 | Emperuak        | <i>Cerbera manghas</i>         | 0  | 0  | 0 | 1  | 0 | 0  | 0 | 0 | 0 | 0  | 0  | 0 | 0  | 0  | 0  | 0  | 0  | 0  |
| 147 | Ketiau          | <i>unidentified</i>            | 0  | 0  | 0 | 0  | 0 | 0  | 0 | 0 | 0 | 0  | 0  | 0 | 0  | 0  | 0  | 0  | 0  | 0  |
| 148 | Merbau          | <i>unidentified</i>            | 0  | 0  | 0 | 0  | 0 | 0  | 0 | 0 | 0 | 0  | 0  | 0 | 0  | 0  | 0  | 0  | 0  | 0  |
| 149 | Balik angin     | <i>Mallotus barbatus</i>       | 0  | 0  | 0 | 1  | 0 | 0  | 0 | 0 | 0 | 0  | 0  | 0 | 0  | 0  | 0  | 0  | 0  | 0  |
| 150 | Cingkang        | <i>Syzygium acuminatissima</i> | 1  | 0  | 0 | 1  | 0 | 0  | 0 | 0 | 0 | 0  | 0  | 0 | 0  | 0  | 0  | 0  | 0  | 0  |
| 151 | Kabal           | <i>Lithocarpus blumeanus</i>   | 1  | 0  | 0 | 0  | 0 | 0  | 0 | 0 | 0 | 0  | 0  | 0 | 0  | 0  | 0  | 0  | 0  | 0  |
| 152 | Medang beliling | <i>Cryptocarya densiflora</i>  | 1  | 0  | 0 | 1  | 0 | 1  | 0 | 0 | 0 | 1  | 1  | 0 | 1  | 0  | 0  | 0  | 0  | 0  |
| 153 | Teruntum putih  | <i>Lumnitzera racemosa</i>     | 1  | 0  | 0 | 0  | 1 | 0  | 0 | 0 | 1 | 0  | 0  | 0 | 0  | 0  | 0  | 0  | 0  | 0  |
| 154 | Tuek            | <i>Vitex pubescens</i>         | 0  | 0  | 0 | 1  | 0 | 0  | 0 | 0 | 0 | 0  | 0  | 0 | 0  | 0  | 0  | 0  | 0  | 0  |
| 155 | Serkek          | Unidentified                   | 0  | 0  | 0 | 1  | 0 | 0  | 0 | 0 | 0 | 0  | 0  | 0 | 0  | 0  | 0  | 0  | 0  | 0  |
| 156 | Sengkelut       | <i>Lycopodiella cernua</i>     | 0  | 0  | 0 | 0  | 0 | 0  | 0 | 0 | 0 | 1  | 0  | 0 | 0  | 0  | 0  | 0  | 0  | 0  |
| 157 | Ruas            | <i>Pharus lappulaceus</i>      | 0  | 0  | 0 | 0  | 0 | 0  | 0 | 0 | 0 | 1  | 0  | 0 | 0  | 0  | 0  | 0  | 0  | 0  |
| 158 | Sp 5            | <i>Psycotria</i> sp.           | 0  | 0  | 0 | 0  | 0 | 0  | 0 | 0 | 0 | 1  | 0  | 0 | 0  | 0  | 0  | 0  | 0  | 1  |
| 159 | Nidipan         | <i>Syzygium incarnatum</i>     | 0  | 0  | 0 | 0  | 0 | 0  | 0 | 0 | 0 | 1  | 0  | 0 | 0  | 0  | 0  | 0  | 0  | 0  |
| 160 | Tumu            | <i>Rhizophora mucronata</i>    | 0  | 0  | 0 | 0  | 0 | 0  | 0 | 0 | 0 | 0  | 0  | 0 | 0  | 0  | 0  | 0  | 0  | 1  |
|     | Total species   |                                | 42 | 10 | 9 | 43 | 4 | 24 | 8 | 4 | 4 | 76 | 34 | 8 | 70 | 11 | 32 | 24 | 26 | 16 |

**Table S6.** List of plant species for *sunggau* construction which the availability is decreasing based on the information from bee farmer respondents.

| Species                       | Village                               |
|-------------------------------|---------------------------------------|
| <i>Cryptocarya densiflora</i> | Kembiri; Tanjung Rusa-Belitung Island |
| <i>Cryptocarya</i> sp.        | Kembiri; Tanjung Rusa-Belitung Island |
| <i>Guioa diplopetala</i>      | Tanjung Rusa-Belitung Island          |
| <i>Lithocarpus</i> sp.        | Perpat                                |
| <i>Litsea accedens</i>        | Kembiri                               |
| <i>Rhodamnia cinerea</i>      | Kembiri                               |
| <i>Shorea balangeran</i>      | Kembiri                               |
| <i>Syzygium urceolatum</i>    | Tanjung Rusa-Belitung Island          |
| <i>Tristaniaopsis obovata</i> | Tanjung Rusa-Belitung Island          |
| <i>Vitex pubescens</i>        | Kembiri                               |

**Table S7.** The analysis vegetation in three forest types. HF = Heath forest, SHF = Swamp heath forest, MF = Mangrove fores.

| Village      | Type of forest           | Category          | Species                            | Individual | Plot | D       | BA     | K         | KR     | F     | FR     | D       | DR       | IVI    | Pi    | LnPi   | (Pi)(lnPi) | H'    | Average of tree diameter |
|--------------|--------------------------|-------------------|------------------------------------|------------|------|---------|--------|-----------|--------|-------|--------|---------|----------|--------|-------|--------|------------|-------|--------------------------|
| Perpat (Per) | Mangrove (MF)            | Seedling and herb | <i>Bruguiera gymnorhiza</i>        | 4          | 3    | -       | -      | 2500.000  | 2.162  | 0.750 | 27.273 | -       | -        | 29.435 | 0.029 | -3.548 | -0.102     |       |                          |
| Perpat (Per) | Mangrove (MF)            | Seedling and herb | <i>Lumnitzera littorea</i>         | 129        | 2    | -       | -      | 80625.000 | 69.730 | 0.500 | 18.182 | -       | -        | 87.912 | 0.928 | -0.075 | -0.069     |       |                          |
| Perpat (Per) | Mangrove (MF)            | Seedling and herb | <i>Ceriops tagal</i>               | 1          | 1    | -       | -      | 625.000   | 0.541  | 0.250 | 9.091  | -       | -        | 9.631  | 0.007 | -4.934 | -0.035     |       |                          |
| Perpat (Per) | Mangrove (MF)            | Seedling and herb | <i>Acrostichum speciosum</i>       | 1          | 1    | -       | -      | 625.000   | 0.541  | 0.250 | 9.091  | -       | -        | 9.631  | 0.007 | -4.934 | -0.035     | 0.374 | -                        |
| Perpat (Per) | Mangrove (MF)            | Seedling and herb | <i>Hibiscus tiliaceus</i>          | 2          | 2    | -       | -      | 1250.000  | 1.081  | 0.500 | 18.182 | -       | -        | 19.263 | 0.014 | -4.241 | -0.061     |       |                          |
| Perpat (Per) | Mangrove (MF)            | Seedling and herb | <i>Glochidion arborescens</i>      | 1          | 1    | -       | -      | 625.000   | 0.541  | 0.250 | 9.091  | -       | -        | 9.631  | 0.007 | -4.934 | -0.035     |       |                          |
| Perpat (Per) | Mangrove (MF)            | Seedling and herb | <i>Avicena alba</i>                | 1          | 1    | -       | -      | 625.000   | 0.541  | 0.250 | 9.091  | -       | -        | 9.631  | 0.007 | -4.934 | -0.035     |       |                          |
| Perpat (Per) | Mangrove (MF)            | Sapling           | <i>Bruguiera sexangula</i>         | 23         | 3    | -       | -      | 36800.000 | 50.000 | 0.120 | 25.000 | -       | -        | 75.000 | 0.500 | -0.693 | -0.347     |       |                          |
| Perpat (Per) | Mangrove (MF)            | Sapling           | <i>Lumnitzera littorea</i>         | 5          | 4    | -       | -      | 8000.000  | 10.870 | 0.160 | 33.333 | -       | -        | 44.203 | 0.109 | -2.219 | -0.241     |       |                          |
| Perpat (Per) | Mangrove (MF)            | Sapling           | <i>Bruguiera gymnorhiza</i>        | 4          | 2    | -       | -      | 6400.000  | 8.696  | 0.080 | 16.667 | -       | -        | 25.362 | 0.087 | -2.442 | -0.212     | 1.317 | -                        |
| Perpat (Per) | Mangrove (MF)            | Sapling           | <i>Podocarpus neriifolius</i>      | 1          | 1    | -       | -      | 1600.000  | 2.174  | 0.040 | 8.333  | -       | -        | 10.507 | 0.022 | -3.829 | -0.083     |       |                          |
| Perpat (Per) | Mangrove (MF)            | Sapling           | <i>Avicena alba</i>                | 1          | 1    | -       | -      | 1600.000  | 2.174  | 0.040 | 8.333  | -       | -        | 10.507 | 0.022 | -3.829 | -0.083     |       |                          |
| Perpat (Per) | Mangrove (MF)            | Sapling           | <i>Melaleuca cajuputi</i>          | 12         | 1    | -       | -      | 19200.000 | 26.087 | 0.040 | 8.333  | -       | -        | 34.420 | 0.261 | -1.344 | -0.351     |       |                          |
| Perpat (Per) | Mangrove (MF)            | Poles             | <i>Bruguiera sexangula</i>         | 4          | 3    | 21.338  | 0.036  | 100.000   | 2.778  | 0.030 | 37.500 | 0.894   | 0.499    | 40.278 | 0.114 | -2.169 | -0.248     |       |                          |
| Perpat (Per) | Mangrove (MF)            | Poles             | <i>Lumnitzera littorea</i>         | 18         | 4    | 87.898  | 0.606  | 450.000   | 12.500 | 0.040 | 50.000 | 15.162  | 8.475    | 62.500 | 0.514 | -0.665 | -0.342     |       |                          |
| Perpat (Per) | Mangrove (MF)            | Poles             | <i>Bruguiera gymnorhiza</i>        | 2          | 1    | 11.783  | 0.011  | 50.000    | 1.389  | 0.010 | 12.500 | 0.272   | 0.152    | 13.889 | 0.057 | -2.862 | -0.164     | 1.213 | -                        |
| Perpat (Per) | Mangrove (MF)            | Poles             | <i>Melaleuca cajuputi</i>          | 10         | 2    | 50.000  | 0.196  | 250.000   | 6.944  | 0.020 | 25.000 | 4.906   | 2.742    | 31.944 | 0.286 | -1.253 | -0.358     |       |                          |
| Perpat (Per) | Mangrove (MF)            | Poles             | <i>Podocarpus neriifolius</i>      | 1          | 1    | 5.414   | 0.002  | 25.000    | 0.694  | 0.010 | 12.500 | 0.058   | 0.032    | 13.194 | 0.029 | -3.555 | -0.102     |       |                          |
| Perpat (Per) | Mangrove (MF)            | tree              | <i>Bruguiera gymnorhiza</i>        | 28         | 4    | 340.764 | 9.115  | 175.000   | 25.686 | 0.010 | 20.000 | 56.972  | 453.595  | 45.686 | 0.257 | -1.359 | -0.349     |       |                          |
| Perpat (Per) | Mangrove (MF)            | tree              | <i>Melaleuca cajuputi</i>          | 10         | 2    | 89.809  | 0.633  | 62.500    | 9.174  | 0.005 | 10.000 | 3.957   | 31.506   | 19.174 | 0.092 | -2.389 | -0.219     |       |                          |
| Perpat (Per) | Mangrove (MF)            | tree              | <i>Xylocarpus granatum</i>         | 1          | 1    | 31.210  | 0.076  | 6.250     | 0.917  | 0.003 | 5.000  | 0.478   | 3.805    | 5.917  | 0.009 | -4.691 | -0.043     | 1.266 | 245.01                   |
| Perpat (Per) | Mangrove (MF)            | tree              | <i>Podocarpus neriifolius</i>      | 6          | 1    | 70.382  | 0.389  | 37.500    | 5.504  | 0.003 | 5.000  | 2.430   | 19.350   | 10.504 | 0.055 | -2.900 | -0.160     |       |                          |
| Perpat (Per) | Mangrove (MF)            | tree              | <i>Lumnitzera littorea</i>         | 58         | 6    | 884.395 | 61.399 | 362.500   | 53.207 | 0.015 | 30.000 | 383.744 | 3055.290 | 83.207 | 0.532 | -0.631 | -0.336     |       |                          |
| Perpat (Per) | Mangrove (MF)            | tree              | <i>Bruguiera sexangula</i>         | 6          | 4    | 53.503  | 0.225  | 37.500    | 5.504  | 0.010 | 20.000 | 1.404   | 11.182   | 25.504 | 0.055 | -2.900 | -0.160     |       |                          |
| Perpat (Per) | Swamp heath forest (SHF) | Seedling and herb | <i>Guioa diplopetala</i>           | 6          | 2    | -       | -      | 3750.000  | 4.317  | 0.500 | 9.524  | -       | -        | 13.840 | 0.043 | -3.143 | -0.136     |       |                          |
| Perpat (Per) | Swamp heath forest (SHF) | Seedling and herb | <i>Alpinia oxymitra</i>            | 96         | 4    | -       | -      | 60000.000 | 69.065 | 1.000 | 19.048 | -       | -        | 88.112 | 0.691 | -0.370 | -0.256     |       | -                        |
| Perpat (Per) | Swamp heath forest (SHF) | Seedling and herb | <i>Wikstroemia androsaemifolia</i> | 2          | 2    | -       | -      | 1250.000  | 1.439  | 0.500 | 9.524  | -       | -        | 10.963 | 0.014 | -4.241 | -0.061     |       |                          |
| Perpat (Per) | Swamp heath forest (SHF) | Seedling and herb | <i>Urophyllum sp.</i>              | 2          | 1    | -       | -      | 1250.000  | 1.439  | 0.250 | 4.762  | -       | -        | 6.201  | 0.014 | -4.241 | -0.061     |       |                          |
| Perpat (Per) | Swamp heath forest (SHF) | Seedling and herb | <i>Syzygium muelleri</i>           | 6          | 2    | -       | -      | 3750.000  | 4.317  | 0.500 | 9.524  | -       | -        | 13.840 | 0.043 | -3.143 | -0.136     |       |                          |
| Perpat (Per) | Swamp heath forest (SHF) | Seedling and herb | <i>Psychotria malayana</i>         | 5          | 2    | -       | -      | 3125.000  | 3.597  | 0.500 | 9.524  | -       | -        | 13.121 | 0.036 | -3.325 | -0.120     |       |                          |
| Perpat (Per) | Swamp heath forest (SHF) | Seedling and herb | <i>Melicope denhamii</i>           | 1          | 1    | -       | -      | 625.000   | 0.719  | 0.250 | 4.762  | -       | -        | 5.481  | 0.007 | -4.934 | -0.035     | 1.260 |                          |
| Perpat (Per) | Swamp heath forest (SHF) | Seedling and herb | <i>Pternandra coerulescens</i>     | 3          | 2    | -       | -      | 1875.000  | 2.158  | 0.500 | 9.524  | -       | -        | 11.682 | 0.022 | -3.836 | -0.083     |       |                          |
| Perpat (Per) | Swamp heath forest (SHF) | Seedling and herb | <i>Schima wallichii</i>            | 1          | 1    | -       | -      | 625.000   | 0.719  | 0.250 | 4.762  | -       | -        | 5.481  | 0.007 | -4.934 | -0.035     |       |                          |
| Perpat (Per) | Swamp heath forest (SHF) | Seedling and herb | <i>Rhodomyrtus tomentosating</i>   | 1          | 1    | -       | -      | 625.000   | 0.719  | 0.250 | 4.762  | -       | -        | 5.481  | 0.007 | -4.934 | -0.035     |       |                          |
| Perpat (Per) | Swamp heath forest (SHF) | Seedling and herb | <i>Tristaniopsis obovata</i>       | 1          | 1    | -       | -      | 625.000   | 0.719  | 0.250 | 4.762  | -       | -        | 5.481  | 0.007 | -4.934 | -0.035     |       |                          |
| Perpat (Per) | Swamp heath forest (SHF) | Seedling and herb | <i>Eugenia leptantha</i>           | 14         | 1    | -       | -      | 8750.000  | 10.072 | 0.250 | 4.762  | -       | -        | 14.834 | 0.101 | -2.295 | -0.231     |       |                          |
| Perpat (Per) | Swamp heath forest (SHF) | Seedling and herb | <i>Syzygium zeylanicum</i>         | 1          | 1    | -       | -      | 625.000   | 0.719  | 0.250 | 4.762  | -       | -        | 5.481  | 0.007 | -4.934 | -0.035     |       |                          |
| Perpat (Per) | Swamp heath forest (SHF) | Sapling           | <i>Dillenia suffruticosa</i>       | 6          | 3    | -       | -      | 600.000   | 20.000 | 0.120 | 20.000 | -       | -        | 40.000 | 0.200 | -1.609 | -0.322     |       |                          |
| Perpat (Per) | Swamp heath forest (SHF) | Sapling           | <i>Urophyllum sp.</i>              | 2          | 1    | -       | -      | 200.000   | 6.667  | 0.040 | 6.667  | -       | -        | 13.333 | 0.067 | -2.708 | -0.181     |       |                          |
| Perpat (Per) | Swamp heath forest (SHF) | Sapling           | <i>Pternandra coerulescens</i>     | 3          | 2    | -       | -      | 300.000   | 10.000 | 0.080 | 13.333 | -       | -        | 23.333 | 0.100 | -2.303 | -0.230     |       |                          |
| Perpat (Per) | Swamp heath forest (SHF) | Sapling           | <i>Microcos tomentosa</i>          | 4          | 2    | -       | -      | 400.000   | 13.333 | 0.080 | 13.333 | -       | -        | 26.667 | 0.133 | -2.015 | -0.269     |       |                          |
| Perpat (Per) | Swamp heath forest (SHF) | Sapling           | <i>Planchonella obovata</i>        | 2          | 2    | -       | -      | 200.000   | 6.667  | 0.080 | 13.333 | -       | -        | 20.000 | 0.067 | -2.708 | -0.181     | 0.322 | -                        |
| Perpat (Per) | Swamp heath forest (SHF) | Sapling           | <i>Garcinia bancana</i>            | 2          | 1    | -       | -      | 200.000   | 6.667  | 0.040 | 6.667  | -       | -        | 13.333 | 0.067 | -2.708 | -0.181     |       |                          |
| Perpat (Per) | Swamp heath forest (SHF) | Sapling           | <i>Calophyllum lanigerum</i>       | 1          | 1    | -       | -      | 100.000   | 3.333  | 0.040 | 6.667  | -       | -        | 10.000 | 0.033 | -3.401 | -0.113     |       |                          |
| Perpat (Per) | Swamp heath forest (SHF) | Sapling           | <i>Melicope denhamii</i>           | 9          | 2    | -       | -      | 900.000   | 30.000 | 0.080 | 13.333 | -       | -        | 43.333 | 0.300 | -1.204 | -0.361     |       |                          |
| Perpat (Per) | Swamp heath forest (SHF) | Sapling           | <i>Demonorops angustifolia</i>     | 1          | 1    | -       | -      | 100.000   | 3.333  | 0.040 | 6.667  | -       | -        | 10.000 | 0.033 | -3.401 | -0.113     |       |                          |
| Perpat (Per) | Swamp heath forest (SHF) | Poles             | <i>Eugenia leptantha</i>           | 1          | 1    | 5.096   | 0.002  | 25.000    | 3.030  | 0.010 | 6.250  | 0.051   | 3.015    | 12.295 | 0.030 | -3.497 | -0.106     |       |                          |
| Perpat (Per) | Swamp heath forest (SHF) | Poles             | <i>Calophyllum lanigerum</i>       | 2          | 2    | 8.280   | 0.003  | 50.000    | 6.061  | 0.020 | 12.500 | 0.069   | 4.075    | 22.636 | 0.061 | -2.803 | -0.170     | 1.970 |                          |
| Perpat (Per) | Swamp heath forest (SHF) | Poles             | <i>Pternandra coerulescens</i>     | 3          | 2    | 17.516  | 0.008  | 75.000    | 9.091  | 0.020 | 12.500 | 0.201   | 11.884   | 33.475 | 0.091 | -2.398 | -0.218     |       |                          |

|              |                          |                   |                                      |     |   |          |       |           |        |       |        |        |        |        |       |        |        |       |             |
|--------------|--------------------------|-------------------|--------------------------------------|-----|---|----------|-------|-----------|--------|-------|--------|--------|--------|--------|-------|--------|--------|-------|-------------|
| Perpat (Per) | Swamp heath forest (SHF) | Poles             | <i>Syzygium racemosum</i>            | 7   | 2 | 32.803   | 0.013 | 175.000   | 21.212 | 0.020 | 12.500 | 0.313  | 18.503 | 52.215 | 0.212 | -1.551 | -0.329 |       |             |
| Perpat (Per) | Swamp heath forest (SHF) | Poles             | <i>Cryptocarya densiflora</i>        | 2   | 1 | 7.962    | 0.003 | 50.000    | 6.061  | 0.010 | 6.250  | 0.063  | 3.734  | 16.044 | 0.061 | -2.803 | -0.170 |       |             |
| Perpat (Per) | Swamp heath forest (SHF) | Poles             | <i>Planchonella obovata</i>          | 3   | 1 | 14.013   | 0.005 | 75.000    | 9.091  | 0.010 | 6.250  | 0.132  | 7.797  | 23.138 | 0.091 | -2.398 | -0.218 |       |             |
| Perpat (Per) | Swamp heath forest (SHF) | Poles             | <i>Tristaniopsis obovata</i>         | 6   | 3 | 33.758   | 0.015 | 150.000   | 18.182 | 0.030 | 18.750 | 0.383  | 22.660 | 59.592 | 0.182 | -1.705 | -0.310 |       |             |
| Perpat (Per) | Swamp heath forest (SHF) | Poles             | <i>Syzygium urceolatum</i>           | 1   | 1 | 6.369    | 0.003 | 25.000    | 3.030  | 0.010 | 6.250  | 0.080  | 4.711  | 13.991 | 0.030 | -3.497 | -0.106 |       |             |
| Perpat (Per) | Swamp heath forest (SHF) | Poles             | <i>Dillenia suffruticosa</i>         | 8   | 3 | 39.809   | 0.016 | 200.000   | 24.242 | 0.030 | 18.750 | 0.397  | 23.497 | 66.489 | 0.242 | -1.417 | -0.344 |       |             |
| Perpat (Per) | Swamp heath forest (SHF) | Tree              | <i>Syzygium cf. Calophyllifolium</i> | 6   | 4 | 103.185  | 0.160 | 25.000    | 9.302  | 0.010 | 9.091  | 1.000  | 4.417  | 22.810 | 0.048 | -3.045 | -0.145 |       |             |
| Perpat (Per) | Swamp heath forest (SHF) | Tree              | <i>Baccaurea idelflexa</i>           | 1   | 1 | 13.694   | 0.015 | 6.250     | 2.326  | 0.003 | 2.273  | 0.092  | 0.406  | 5.005  | 0.008 | -4.836 | -0.038 |       |             |
| Perpat (Per) | Swamp heath forest (SHF) | Tree              | <i>Shorea balangeran</i>             | 1   | 1 | 25.478   | 0.051 | 6.250     | 2.326  | 0.003 | 2.273  | 0.318  | 1.407  | 6.005  | 0.008 | -4.836 | -0.038 |       |             |
| Perpat (Per) | Swamp heath forest (SHF) | Tree              | <i>Calophyllum lanigerum</i>         | 3   | 2 | 31.529   | 0.027 | 12.500    | 4.651  | 0.005 | 4.545  | 0.166  | 0.734  | 9.931  | 0.024 | -3.738 | -0.089 |       |             |
| Perpat (Per) | Swamp heath forest (SHF) | Tree              | <i>Melaleuca cajuputi</i>            | 48  | 4 | 1032.166 | 1.932 | 25.000    | 9.302  | 0.010 | 9.091  | 12.075 | 53.336 | 71.729 | 0.381 | -0.965 | -0.368 |       |             |
| Perpat (Per) | Swamp heath forest (SHF) | Tree              | <i>Cratogeomys glaucum</i>           | 10  | 3 | 178.025  | 0.282 | 18.750    | 6.977  | 0.008 | 6.818  | 1.763  | 7.786  | 21.581 | 0.079 | -2.534 | -0.201 |       |             |
| Perpat (Per) | Swamp heath forest (SHF) | Tree              | <i>Rhodamnia cinerea</i>             | 2   | 2 | 19.745   | 0.015 | 12.500    | 4.651  | 0.005 | 4.545  | 0.096  | 0.424  | 9.621  | 0.016 | -4.143 | -0.066 |       |             |
| Perpat (Per) | Swamp heath forest (SHF) | Tree              | <i>Garcinia celebica</i>             | 10  | 2 | 121.019  | 0.123 | 12.500    | 4.651  | 0.005 | 4.545  | 0.769  | 3.395  | 12.592 | 0.079 | -2.534 | -0.201 |       |             |
| Perpat (Per) | Swamp heath forest (SHF) | Tree              | <i>Lhytocrarpus bancanus</i>         | 4   | 1 | 40.764   | 0.033 | 6.250     | 2.326  | 0.003 | 2.273  | 0.207  | 0.912  | 5.510  | 0.032 | -3.450 | -0.110 |       |             |
| Perpat (Per) | Swamp heath forest (SHF) | Tree              | <i>Pternandra coerulescens</i>       | 1   | 1 | 8.280    | 0.005 | 6.250     | 2.326  | 0.003 | 2.273  | 0.034  | 0.149  | 4.747  | 0.008 | -4.836 | -0.038 |       |             |
| Perpat (Per) | Swamp heath forest (SHF) | Tree              | <i>Syzygium racemosum</i>            | 1   | 1 | 9.554    | 0.007 | 6.250     | 2.326  | 0.003 | 2.273  | 0.045  | 0.198  | 4.796  | 0.008 | -4.836 | -0.038 | 2.329 | 99.47886508 |
| Perpat (Per) | Swamp heath forest (SHF) | Tree              | <i>Garcinia bancana</i>              | 3   | 1 | 53.503   | 0.081 | 6.250     | 2.326  | 0.003 | 2.273  | 0.505  | 2.232  | 6.830  | 0.024 | -3.738 | -0.089 |       |             |
| Perpat (Per) | Swamp heath forest (SHF) | Tree              | <i>Syzygium palembanicum</i>         | 2   | 2 | 55.096   | 0.124 | 12.500    | 4.651  | 0.005 | 4.545  | 0.775  | 3.424  | 12.620 | 0.016 | -4.143 | -0.066 |       |             |
| Perpat (Per) | Swamp heath forest (SHF) | Tree              | <i>Helicia robusta</i>               | 2   | 2 | 50.955   | 0.120 | 12.500    | 4.651  | 0.005 | 4.545  | 0.752  | 3.322  | 12.518 | 0.016 | -4.143 | -0.066 |       |             |
| Perpat (Per) | Swamp heath forest (SHF) | Tree              | <i>Planchonella obovata</i>          | 1   | 1 | 10.510   | 0.009 | 6.250     | 2.326  | 0.003 | 2.273  | 0.054  | 0.239  | 4.838  | 0.008 | -4.836 | -0.038 |       |             |
| Perpat (Per) | Swamp heath forest (SHF) | Tree              | <i>Melicope denhamii</i>             | 1   | 1 | 8.599    | 0.006 | 6.250     | 2.326  | 0.003 | 2.273  | 0.036  | 0.160  | 4.759  | 0.008 | -4.836 | -0.038 |       |             |
| Perpat (Per) | Swamp heath forest (SHF) | Tree              | <i>Tristaniopsis obovata</i>         | 1   | 1 | 10.510   | 0.009 | 6.250     | 2.326  | 0.003 | 2.273  | 0.054  | 0.239  | 4.838  | 0.008 | -4.836 | -0.038 |       |             |
| Perpat (Per) | Swamp heath forest (SHF) | Tree              | <i>Adinandra dumosa</i>              | 3   | 2 | 30.573   | 0.027 | 12.500    | 4.651  | 0.005 | 4.545  | 0.167  | 0.740  | 9.936  | 0.024 | -3.738 | -0.089 |       |             |
| Perpat (Per) | Swamp heath forest (SHF) | Tree              | <i>Syzygium urceolatum</i>           | 11  | 4 | 150.955  | 0.192 | 25.000    | 9.302  | 0.010 | 9.091  | 1.199  | 5.294  | 23.687 | 0.087 | -2.438 | -0.213 |       |             |
| Perpat (Per) | Swamp heath forest (SHF) | Tree              | <i>Syzygium acuminatissima</i>       | 1   | 1 | 15.605   | 0.019 | 6.250     | 2.326  | 0.003 | 2.273  | 0.119  | 0.528  | 5.126  | 0.008 | -4.836 | -0.038 |       |             |
| Perpat (Per) | Swamp heath forest (SHF) | Tree              | <i>Schima wallichii</i>              | 8   | 3 | 171.019  | 0.355 | 18.750    | 6.977  | 0.008 | 6.818  | 2.221  | 9.809  | 23.604 | 0.063 | -2.757 | -0.175 |       |             |
| Perpat (Per) | Swamp heath forest (SHF) | Tree              | <i>Dillenia suffruticosa</i>         | 6   | 3 | 47.771   | 0.030 | 18.750    | 6.977  | 0.008 | 6.818  | 0.189  | 0.834  | 14.629 | 0.048 | -3.045 | -0.145 |       |             |
| Perpat (Per) | Heath forest (HF)        | Seedling and herb | <i>Tristaniopsis obovata</i>         | 7   | 4 | -        | -     | 1346.154  | 1.443  | 0.308 | 3.922  | -      | -      | 5.365  | 0.014 | -4.238 | -0.061 |       |             |
| Perpat (Per) | Heath forest (HF)        | Seedling and herb | <i>Calophyllum lanigerum</i>         | 15  | 5 | -        | -     | 2884.615  | 3.093  | 0.385 | 4.902  | -      | -      | 7.995  | 0.031 | -3.476 | -0.108 |       |             |
| Perpat (Per) | Heath forest (HF)        | Seedling and herb | <i>Shorea balangeran</i>             | 29  | 4 | -        | -     | 5576.923  | 5.979  | 0.308 | 3.922  | -      | -      | 9.901  | 0.060 | -2.817 | -0.168 |       |             |
| Perpat (Per) | Heath forest (HF)        | Seedling and herb | <i>Baeckea frutescens</i>            | 25  | 4 | -        | -     | 4807.692  | 5.155  | 0.308 | 3.922  | -      | -      | 9.076  | 0.052 | -2.965 | -0.153 |       |             |
| Perpat (Per) | Heath forest (HF)        | Seedling and herb | <i>Coptosapelta tomentosa</i>        | 33  | 4 | -        | -     | 6346.154  | 6.804  | 0.308 | 3.922  | -      | -      | 10.726 | 0.068 | -2.688 | -0.183 |       |             |
| Perpat (Per) | Heath forest (HF)        | Seedling and herb | <i>Eugenia leptantha</i>             | 116 | 4 | -        | -     | 22307.692 | 23.918 | 0.308 | 3.922  | -      | -      | 27.839 | 0.239 | -1.431 | -0.342 |       |             |
| Perpat (Per) | Heath forest (HF)        | Seedling and herb | <i>Dendrotrophe varians</i>          | 5   | 1 | -        | -     | 961.538   | 1.031  | 0.077 | 0.980  | -      | -      | 2.011  | 0.010 | -4.575 | -0.047 |       |             |
| Perpat (Per) | Heath forest (HF)        | Seedling and herb | <i>Bromheadia finlaysoniana</i>      | 32  | 3 | -        | -     | 6153.846  | 6.598  | 0.231 | 2.941  | -      | -      | 9.539  | 0.066 | -2.718 | -0.179 |       |             |
| Perpat (Per) | Heath forest (HF)        | Seedling and herb | <i>Syzygium bankense</i>             | 31  | 5 | -        | -     | 5961.538  | 6.392  | 0.385 | 4.902  | -      | -      | 11.294 | 0.064 | -2.750 | -0.176 |       |             |
| Perpat (Per) | Heath forest (HF)        | Seedling and herb | <i>Styphelia malayana</i>            | 11  | 2 | -        | -     | 2115.385  | 2.268  | 0.154 | 1.961  | -      | -      | 4.229  | 0.023 | -3.786 | -0.086 |       |             |
| Perpat (Per) | Heath forest (HF)        | Seedling and herb | <i>Salacia grandifolia</i>           | 4   | 2 | -        | -     | 769.231   | 0.825  | 0.154 | 1.961  | -      | -      | 2.786  | 0.008 | -4.798 | -0.040 |       |             |
| Perpat (Per) | Heath forest (HF)        | Seedling and herb | <i>Oldenlandia biflora</i>           | 12  | 6 | -        | -     | 2307.692  | 2.474  | 0.462 | 5.882  | -      | -      | 8.357  | 0.025 | -3.699 | -0.092 |       |             |
| Perpat (Per) | Heath forest (HF)        | Seedling and herb | <i>Tristaniopsis whiteana</i>        | 2   | 1 | -        | -     | 384.615   | 0.412  | 0.077 | 0.980  | -      | -      | 1.393  | 0.004 | -5.491 | -0.023 | 3.022 |             |
| Perpat (Per) | Heath forest (HF)        | Seedling and herb | <i>Syzygium muelleri</i>             | 25  | 4 | -        | -     | 4807.692  | 5.155  | 0.308 | 3.922  | -      | -      | 9.076  | 0.052 | -2.965 | -0.153 |       |             |
| Perpat (Per) | Heath forest (HF)        | Seedling and herb | <i>Syzygium urceolatum</i>           | 14  | 2 | -        | -     | 2692.308  | 2.887  | 0.154 | 1.961  | -      | -      | 4.847  | 0.029 | -3.545 | -0.102 |       |             |
| Perpat (Per) | Heath forest (HF)        | Seedling and herb | <i>Calophyllum pulcherrimum</i>      | 29  | 6 | -        | -     | 5576.923  | 5.979  | 0.462 | 5.882  | -      | -      | 11.862 | 0.060 | -2.817 | -0.168 |       |             |
| Perpat (Per) | Heath forest (HF)        | Seedling and herb | <i>Lindera lucida</i>                | 1   | 1 | -        | -     | 192.308   | 0.206  | 0.077 | 0.980  | -      | -      | 1.187  | 0.002 | -6.184 | -0.013 |       |             |
| Perpat (Per) | Heath forest (HF)        | Seedling and herb | <i>Canthium horridum</i>             | 1   | 1 | -        | -     | 192.308   | 0.206  | 0.077 | 0.980  | -      | -      | 1.187  | 0.002 | -6.184 | -0.013 |       |             |
| Perpat (Per) | Heath forest (HF)        | Seedling and herb | <i>Eurycoma longifolia</i>           | 2   | 1 | -        | -     | 384.615   | 0.412  | 0.077 | 0.980  | -      | -      | 1.393  | 0.004 | -5.491 | -0.023 |       |             |
| Perpat (Per) | Heath forest (HF)        | Seedling and herb | <i>Pternandra coerulescens</i>       | 3   | 2 | -        | -     | 576.923   | 0.619  | 0.154 | 1.961  | -      | -      | 2.579  | 0.006 | -5.086 | -0.031 |       |             |
| Perpat (Per) | Heath forest (HF)        | Seedling and herb | <i>Scleria sp.</i>                   | 3   | 2 | -        | -     | 576.923   | 0.619  | 0.154 | 1.961  | -      | -      | 2.579  | 0.006 | -5.086 | -0.031 |       |             |
| Perpat (Per) | Heath forest (HF)        | Seedling and herb | <i>Hopea bilitonensis</i>            | 10  | 2 | -        | -     | 1923.077  | 2.062  | 0.154 | 1.961  | -      | -      | 4.023  | 0.021 | -3.882 | -0.080 |       |             |
| Perpat (Per) | Heath forest (HF)        | Seedling and herb | <i>Inocarpus fagifer</i>             | 12  | 1 | -        | -     | 2307.692  | 2.474  | 0.077 | 0.980  | -      | -      | 3.455  | 0.025 | -3.699 | -0.092 |       |             |
| Perpat (Per) | Heath forest (HF)        | Seedling and herb | <i>Ampelocissus thyrsoiflora</i>     | 1   | 1 | -        | -     | 192.308   | 0.206  | 0.077 | 0.980  | -      | -      | 1.187  | 0.002 | -6.184 | -0.013 |       |             |



|              |                   |                   |                                      |    |   |   |   |          |        |       |       |   |   |        |       |        |        |       |
|--------------|-------------------|-------------------|--------------------------------------|----|---|---|---|----------|--------|-------|-------|---|---|--------|-------|--------|--------|-------|
| Perpat (Per) | Heath forest (HF) | Seedling and herb | <i>Cryptocaria densiflora</i>        | 1  | 1 | - | - | 192.308  | 0.206  | 0.077 | 0.980 | - | - | 1.187  | 0.002 | -6.184 | -0.013 |       |
| Perpat (Per) | Heath forest (HF) | Seedling and herb | <i>Nepenthes reinwardtiana</i>       | 5  | 1 | - | - | 961.538  | 1.031  | 0.077 | 0.980 | - | - | 2.011  | 0.010 | -4.575 | -0.047 |       |
| Perpat (Per) | Heath forest (HF) | Seedling and herb | <i>Eriocaulan willdenocianum</i>     | 5  | 1 | - | - | 961.538  | 1.031  | 0.077 | 0.980 | - | - | 2.011  | 0.010 | -4.575 | -0.047 |       |
| Perpat (Per) | Heath forest (HF) | Seedling and herb | <i>Planchonella obovata</i>          | 1  | 1 | - | - | 192.308  | 0.206  | 0.077 | 0.980 | - | - | 1.187  | 0.002 | -6.184 | -0.013 |       |
| Perpat (Per) | Heath forest (HF) | Seedling and herb | <i>Psychotria malayana</i>           | 6  | 2 | - | - | 1153.846 | 1.237  | 0.154 | 1.961 | - | - | 3.198  | 0.012 | -4.392 | -0.054 |       |
| Perpat (Per) | Heath forest (HF) | Seedling and herb | <i>Guioa diplopetala</i>             | 10 | 3 | - | - | 1923.077 | 2.062  | 0.231 | 2.941 | - | - | 5.003  | 0.021 | -3.882 | -0.080 |       |
| Perpat (Per) | Heath forest (HF) | Seedling and herb | <i>Bouea macrophylla</i>             | 1  | 1 | - | - | 192.308  | 0.206  | 0.077 | 0.980 | - | - | 1.187  | 0.002 | -6.184 | -0.013 |       |
| Perpat (Per) | Heath forest (HF) | Seedling and herb | <i>Dentella repens</i>               | 1  | 1 | - | - | 192.308  | 0.206  | 0.077 | 0.980 | - | - | 1.187  | 0.002 | -6.184 | -0.013 |       |
| Perpat (Per) | Heath forest (HF) | Seedling and herb | <i>Garcinia celebica</i>             | 1  | 1 | - | - | 192.308  | 0.206  | 0.077 | 0.980 | - | - | 1.187  | 0.002 | -6.184 | -0.013 |       |
| Perpat (Per) | Heath forest (HF) | Seedling and herb | <i>Ardisia haseltii</i>              | 3  | 1 | - | - | 576.923  | 0.619  | 0.077 | 0.980 | - | - | 1.599  | 0.006 | -5.086 | -0.031 |       |
| Perpat (Per) | Heath forest (HF) | Seedling and herb | <i>Buchanania arborescens</i>        | 1  | 1 | - | - | 192.308  | 0.206  | 0.077 | 0.980 | - | - | 1.187  | 0.002 | -6.184 | -0.013 |       |
| Perpat (Per) | Heath forest (HF) | Seedling and herb | <i>Syzygium racemosum</i>            | 1  | 1 | - | - | 192.308  | 0.206  | 0.077 | 0.980 | - | - | 1.187  | 0.002 | -6.184 | -0.013 |       |
| Perpat (Per) | Heath forest (HF) | Seedling and herb | <i>Diospyros ridleyi</i>             | 1  | 1 | - | - | 192.308  | 0.206  | 0.077 | 0.980 | - | - | 1.187  | 0.002 | -6.184 | -0.013 |       |
| Perpat (Per) | Heath forest (HF) | Seedling and herb | <i>Rhodamnia cinerea</i>             | 1  | 1 | - | - | 192.308  | 0.206  | 0.077 | 0.980 | - | - | 1.187  | 0.002 | -6.184 | -0.013 |       |
| Perpat (Per) | Heath forest (HF) | Seedling and herb | <i>Derris elliptica</i>              | 1  | 1 | - | - | 192.308  | 0.206  | 0.077 | 0.980 | - | - | 1.187  | 0.002 | -6.184 | -0.013 |       |
| Perpat (Per) | Heath forest (HF) | Seedling and herb | <i>Alpinia oxymitra</i>              | 1  | 1 | - | - | 192.308  | 0.206  | 0.077 | 0.980 | - | - | 1.187  | 0.002 | -6.184 | -0.013 |       |
| Perpat (Per) | Heath forest (HF) | Seedling and herb | <i>Syzygium cf. calophyllifolium</i> | 1  | 1 | - | - | 192.308  | 0.206  | 0.077 | 0.980 | - | - | 1.187  | 0.002 | -6.184 | -0.013 |       |
| Perpat (Per) | Heath forest (HF) | Seedling and herb | <i>Psychotria sp.</i>                | 1  | 1 | - | - | 192.308  | 0.206  | 0.077 | 0.980 | - | - | 1.187  | 0.002 | -6.184 | -0.013 |       |
| Perpat (Per) | Heath forest (HF) | Seedling and herb | <i>Gaertnera sp.</i>                 | 3  | 1 | - | - | 576.923  | 0.619  | 0.077 | 0.980 | - | - | 1.599  | 0.006 | -5.086 | -0.031 |       |
| Perpat (Per) | Heath forest (HF) | Seedling and herb | <i>Melicope denhamii</i>             | 1  | 1 | - | - | 192.308  | 0.206  | 0.077 | 0.980 | - | - | 1.187  | 0.002 | -6.184 | -0.013 |       |
| Perpat (Per) | Heath forest (HF) | Seedling and herb | <i>Calophyllum calaba</i>            | 2  | 2 | - | - | 384.615  | 0.412  | 0.154 | 1.961 | - | - | 2.373  | 0.004 | -5.491 | -0.023 |       |
| Perpat (Per) | Heath forest (HF) | Seedling and herb | <i>Eurya glabra</i>                  | 1  | 1 | - | - | 192.308  | 0.206  | 0.077 | 0.980 | - | - | 1.187  | 0.002 | -6.184 | -0.013 |       |
| Perpat (Per) | Heath forest (HF) | Seedling and herb | <i>Gnetum cuspidatum</i>             | 1  | 1 | - | - | 192.308  | 0.206  | 0.077 | 0.980 | - | - | 1.187  | 0.002 | -6.184 | -0.013 |       |
| Perpat (Per) | Heath forest (HF) | Seedling and herb | <i>Schima wallichii</i>              | 1  | 1 | - | - | 192.308  | 0.206  | 0.077 | 0.980 | - | - | 1.187  | 0.002 | -6.184 | -0.013 |       |
| Perpat (Per) | Heath forest (HF) | Seedling and herb | <i>Pharus lappulaceus</i>            | 6  | 1 | - | - | 1153.846 | 1.237  | 0.077 | 0.980 | - | - | 2.218  | 0.012 | -4.392 | -0.054 |       |
| Perpat (Per) | Heath forest (HF) | Seedling and herb | <i>Lycopodiella cernua</i>           | 1  | 1 | - | - | 192.308  | 0.206  | 0.077 | 0.980 | - | - | 1.187  | 0.002 | -6.184 | -0.013 |       |
| Perpat (Per) | Heath forest (HF) | Seedling and herb | <i>Eurya acuminata</i>               | 1  | 1 | - | - | 192.308  | 0.206  | 0.077 | 0.980 | - | - | 1.187  | 0.002 | -6.184 | -0.013 |       |
| Perpat (Per) | Heath forest (HF) | Seedling and herb | <i>Neouvaria acuminatissima</i>      | 1  | 1 | - | - | 192.308  | 0.206  | 0.077 | 0.980 | - | - | 1.187  | 0.002 | -6.184 | -0.013 |       |
| Perpat (Per) | Heath forest (HF) | Seedling and herb | <i>Calophyllum calaba</i>            | 2  | 2 | - | - | 384.615  | 0.412  | 0.154 | 1.961 | - | - | 2.373  | 0.004 | -5.491 | -0.023 |       |
| Perpat (Per) | Heath forest (HF) | Sapling           | <i>Tristaniaopsis obovata</i>        | 72 | 8 | - | - | 2215.385 | 22.291 | 0.615 | 9.195 | - | - | 31.486 | 0.223 | -1.501 | -0.335 |       |
| Perpat (Per) | Heath forest (HF) | Sapling           | <i>Garcinia bancana</i>              | 7  | 3 | - | - | 215.385  | 2.167  | 0.231 | 3.448 | - | - | 5.615  | 0.022 | -3.832 | -0.083 |       |
| Perpat (Per) | Heath forest (HF) | Sapling           | <i>Calophyllum lanigerum</i>         | 40 | 6 | - | - | 1230.769 | 12.384 | 0.462 | 6.897 | - | - | 19.280 | 0.124 | -2.089 | -0.259 |       |
| Perpat (Per) | Heath forest (HF) | Sapling           | <i>Cratoxylum glaucum</i>            | 6  | 4 | - | - | 184.615  | 1.858  | 0.308 | 4.598 | - | - | 6.455  | 0.019 | -3.986 | -0.074 |       |
| Perpat (Per) | Heath forest (HF) | Sapling           | <i>Shorea balangeran</i>             | 4  | 2 | - | - | 123.077  | 1.238  | 0.154 | 2.299 | - | - | 3.537  | 0.012 | -4.391 | -0.054 |       |
| Perpat (Per) | Heath forest (HF) | Sapling           | <i>Baeckea frutescens</i>            | 19 | 4 | - | - | 584.615  | 5.882  | 0.308 | 4.598 | - | - | 10.480 | 0.059 | -2.833 | -0.167 |       |
| Perpat (Per) | Heath forest (HF) | Sapling           | <i>Leptospermum polygalifolium</i>   | 9  | 2 | - | - | 276.923  | 2.786  | 0.154 | 2.299 | - | - | 5.085  | 0.028 | -3.580 | -0.100 |       |
| Perpat (Per) | Heath forest (HF) | Sapling           | <i>Eugenia leptantha</i>             | 5  | 1 | - | - | 153.846  | 1.548  | 0.077 | 1.149 | - | - | 2.697  | 0.015 | -4.168 | -0.065 |       |
| Perpat (Per) | Heath forest (HF) | Sapling           | <i>Styphelia malayana</i>            | 5  | 1 | - | - | 153.846  | 1.548  | 0.077 | 1.149 | - | - | 2.697  | 0.015 | -4.168 | -0.065 |       |
| Perpat (Per) | Heath forest (HF) | Sapling           | <i>Tristaniaopsis whiteana</i>       | 2  | 1 | - | - | 61.538   | 0.619  | 0.077 | 1.149 | - | - | 1.769  | 0.006 | -5.085 | -0.031 |       |
| Perpat (Per) | Heath forest (HF) | Sapling           | <i>Syzygium muelleri</i>             | 11 | 5 | - | - | 338.462  | 3.406  | 0.385 | 5.747 | - | - | 9.153  | 0.034 | -3.380 | -0.115 |       |
| Perpat (Per) | Heath forest (HF) | Sapling           | <i>Syzygium urceolatum</i>           | 9  | 6 | - | - | 276.923  | 2.786  | 0.462 | 6.897 | - | - | 9.683  | 0.028 | -3.580 | -0.100 |       |
| Perpat (Per) | Heath forest (HF) | Sapling           | <i>Memecylon cf. acuminatissimum</i> | 1  | 1 | - | - | 30.769   | 0.310  | 0.077 | 1.149 | - | - | 1.459  | 0.003 | -5.778 | -0.018 | 2.982 |
| Perpat (Per) | Heath forest (HF) | Sapling           | <i>Gnetum gnemonoides</i>            | 3  | 2 | - | - | 92.308   | 0.929  | 0.154 | 2.299 | - | - | 3.228  | 0.009 | -4.679 | -0.043 |       |
| Perpat (Per) | Heath forest (HF) | Sapling           | <i>Ficus fulva</i>                   | 1  | 1 | - | - | 30.769   | 0.310  | 0.077 | 1.149 | - | - | 1.459  | 0.003 | -5.778 | -0.018 |       |
| Perpat (Per) | Heath forest (HF) | Sapling           | <i>Calophyllum pulcherrimum</i>      | 14 | 5 | - | - | 430.769  | 4.334  | 0.385 | 5.747 | - | - | 10.081 | 0.043 | -3.139 | -0.136 |       |
| Perpat (Per) | Heath forest (HF) | Sapling           | <i>Lindera lucida</i>                | 1  | 1 | - | - | 30.769   | 0.310  | 0.077 | 1.149 | - | - | 1.459  | 0.003 | -5.778 | -0.018 |       |
| Perpat (Per) | Heath forest (HF) | Sapling           | <i>Canthium horridum</i>             | 1  | 1 | - | - | 30.769   | 0.310  | 0.077 | 1.149 | - | - | 1.459  | 0.003 | -5.778 | -0.018 |       |
| Perpat (Per) | Heath forest (HF) | Sapling           | <i>Eurycoma longifolia</i>           | 2  | 1 | - | - | 61.538   | 0.619  | 0.077 | 1.149 | - | - | 1.769  | 0.006 | -5.085 | -0.031 |       |
| Perpat (Per) | Heath forest (HF) | Sapling           | <i>Pternandra coerulescens</i>       | 1  | 1 | - | - | 30.769   | 0.310  | 0.077 | 1.149 | - | - | 1.459  | 0.003 | -5.778 | -0.018 |       |
| Perpat (Per) | Heath forest (HF) | Sapling           | <i>Hopea blitonensis</i>             | 30 | 4 | - | - | 923.077  | 9.288  | 0.308 | 4.598 | - | - | 13.886 | 0.093 | -2.376 | -0.221 |       |
| Perpat (Per) | Heath forest (HF) | Sapling           | <i>Inocarpus fagifol</i>             | 5  | 1 | - | - | 153.846  | 1.548  | 0.077 | 1.149 | - | - | 2.697  | 0.015 | -4.168 | -0.065 |       |
| Perpat (Per) | Heath forest (HF) | Sapling           | <i>Melaleuca cajuputi</i>            | 1  | 1 | - | - | 30.769   | 0.310  | 0.077 | 1.149 | - | - | 1.459  | 0.003 | -5.778 | -0.018 |       |
| Perpat (Per) | Heath forest (HF) | Sapling           | <i>Artocarpus cf. glaucus</i>        | 4  | 1 | - | - | 123.077  | 1.238  | 0.077 | 1.149 | - | - | 2.388  | 0.012 | -4.391 | -0.054 |       |
| Perpat (Per) | Heath forest (HF) | Sapling           | <i>Planchonella obovata</i>          | 2  | 1 | - | - | 61.538   | 0.619  | 0.077 | 1.149 | - | - | 1.769  | 0.006 | -5.085 | -0.031 |       |

|              |                   |         |                                      |    |   |         |       |         |        |       |        |        |        |        |       |        |        |       |        |
|--------------|-------------------|---------|--------------------------------------|----|---|---------|-------|---------|--------|-------|--------|--------|--------|--------|-------|--------|--------|-------|--------|
| Perpat (Per) | Heath forest (HF) | Sapling | <i>Guioa diplopetala</i>             | 3  | 1 | -       | -     | 92.308  | 0.929  | 0.077 | 1.149  | -      | -      | 2.078  | 0.009 | -4.679 | -0.043 |       |        |
| Perpat (Per) | Heath forest (HF) | Sapling | <i>Claoxylon longifolium</i>         | 1  | 1 | -       | -     | 30.769  | 0.310  | 0.077 | 1.149  | -      | -      | 1.459  | 0.003 | -5.778 | -0.018 |       |        |
| Perpat (Per) | Heath forest (HF) | Sapling | <i>Garcinia celebica</i>             | 2  | 1 | -       | -     | 61.538  | 0.619  | 0.077 | 1.149  | -      | -      | 1.769  | 0.006 | -5.085 | -0.031 |       |        |
| Perpat (Per) | Heath forest (HF) | Sapling | <i>Salacia grandifolia</i>           | 1  | 1 | -       | -     | 30.769  | 0.310  | 0.077 | 1.149  | -      | -      | 1.459  | 0.003 | -5.778 | -0.018 |       |        |
| Perpat (Per) | Heath forest (HF) | Sapling | <i>Ardisia haseltii</i>              | 2  | 1 | -       | -     | 61.538  | 0.619  | 0.077 | 1.149  | -      | -      | 1.769  | 0.006 | -5.085 | -0.031 |       |        |
| Perpat (Per) | Heath forest (HF) | Sapling | <i>Buchanania arborescens</i>        | 1  | 1 | -       | -     | 30.769  | 0.310  | 0.077 | 1.149  | -      | -      | 1.459  | 0.003 | -5.778 | -0.018 |       |        |
| Perpat (Per) | Heath forest (HF) | Sapling | <i>Syzygium racemosum</i>            | 2  | 1 | -       | -     | 61.538  | 0.619  | 0.077 | 1.149  | -      | -      | 1.769  | 0.006 | -5.085 | -0.031 |       |        |
| Perpat (Per) | Heath forest (HF) | Sapling | <i>Syzygium cf. calophyllifolium</i> | 4  | 1 | -       | -     | 123.077 | 1.238  | 0.077 | 1.149  | -      | -      | 2.388  | 0.012 | -4.391 | -0.054 |       |        |
| Perpat (Per) | Heath forest (HF) | Sapling | <i>Psychotria sp.</i>                | 1  | 1 | -       | -     | 30.769  | 0.310  | 0.077 | 1.149  | -      | -      | 1.459  | 0.003 | -5.778 | -0.018 |       |        |
| Perpat (Per) | Heath forest (HF) | Sapling | <i>Gaertnera sp.</i>                 | 8  | 2 | -       | -     | 246.154 | 2.477  | 0.154 | 2.299  | -      | -      | 4.776  | 0.025 | -3.698 | -0.092 |       |        |
| Perpat (Per) | Heath forest (HF) | Sapling | <i>Syzygium incarnatum</i>           | 2  | 2 | -       | -     | 61.538  | 0.619  | 0.154 | 2.299  | -      | -      | 2.918  | 0.006 | -5.085 | -0.031 |       |        |
| Perpat (Per) | Heath forest (HF) | Sapling | <i>Syzygium zeylanicum</i>           | 8  | 1 | -       | -     | 246.154 | 2.477  | 0.077 | 1.149  | -      | -      | 3.626  | 0.025 | -3.698 | -0.092 |       |        |
| Perpat (Per) | Heath forest (HF) | Sapling | <i>Ilex cymosa</i>                   | 1  | 1 | -       | -     | 30.769  | 0.310  | 0.077 | 1.149  | -      | -      | 1.459  | 0.003 | -5.778 | -0.018 |       |        |
| Perpat (Per) | Heath forest (HF) | Sapling | <i>Eurya glabra</i>                  | 3  | 2 | -       | -     | 92.308  | 0.929  | 0.154 | 2.299  | -      | -      | 3.228  | 0.009 | -4.679 | -0.043 |       |        |
| Perpat (Per) | Heath forest (HF) | Sapling | <i>Lepisanthes amoena</i>            | 3  | 1 | -       | -     | 92.308  | 0.929  | 0.077 | 1.149  | -      | -      | 2.078  | 0.009 | -4.679 | -0.043 |       |        |
| Perpat (Per) | Heath forest (HF) | Sapling | <i>Urophyllum arboreum</i>           | 1  | 1 | -       | -     | 30.769  | 0.310  | 0.077 | 1.149  | -      | -      | 1.459  | 0.003 | -5.778 | -0.018 |       |        |
| Perpat (Per) | Heath forest (HF) | Sapling | <i>Schima walichii</i>               | 21 | 1 | -       | -     | 646.154 | 6.502  | 0.077 | 1.149  | -      | -      | 7.651  | 0.065 | -2.733 | -0.178 |       |        |
| Perpat (Per) | Heath forest (HF) | Sapling | <i>Rhodomyrtus tomentosa</i>         | 1  | 1 | -       | -     | 30.769  | 0.310  | 0.077 | 1.149  | -      | -      | 1.459  | 0.003 | -5.778 | -0.018 |       |        |
| Perpat (Per) | Heath forest (HF) | Sapling | <i>Aporosa frutescens</i>            | 1  | 1 | -       | -     | 30.769  | 0.310  | 0.077 | 1.149  | -      | -      | 1.459  | 0.003 | -5.778 | -0.018 |       |        |
| Perpat (Per) | Heath forest (HF) | Sapling | <i>Neouwaria acuminatissima</i>      | 2  | 1 | -       | -     | 61.538  | 0.619  | 0.077 | 1.149  | -      | -      | 1.769  | 0.006 | -5.085 | -0.031 |       |        |
| Perpat (Per) | Heath forest (HF) | Poles   | <i>Shorea balangeran</i>             | 3  | 3 | 37.834  | 0.112 | 23.077  | 3.297  | 0.231 | 5.000  | 0.864  | 1.462  | 9.759  | 0.033 | -3.412 | -0.112 |       |        |
| Perpat (Per) | Heath forest (HF) | Poles   | <i>Garcinia bancana</i>              | 6  | 4 | 72.070  | 0.408 | 46.154  | 6.593  | 0.308 | 6.667  | 3.136  | 5.306  | 18.566 | 0.066 | -2.719 | -0.179 |       |        |
| Perpat (Per) | Heath forest (HF) | Poles   | <i>Cratoxylum glaucum</i>            | 4  | 4 | 52.643  | 0.218 | 30.769  | 4.396  | 0.308 | 6.667  | 1.673  | 2.831  | 13.893 | 0.044 | -3.125 | -0.137 |       |        |
| Perpat (Per) | Heath forest (HF) | Poles   | <i>Tristanopsis obovata</i>          | 5  | 5 | 62.293  | 0.305 | 38.462  | 5.495  | 0.385 | 8.333  | 2.343  | 3.964  | 17.792 | 0.055 | -2.901 | -0.159 |       |        |
| Perpat (Per) | Heath forest (HF) | Poles   | <i>Leptospermum polygalifolium</i>   | 6  | 3 | 79.459  | 0.496 | 46.154  | 6.593  | 0.231 | 5.000  | 3.812  | 6.449  | 18.043 | 0.066 | -2.719 | -0.179 |       |        |
| Perpat (Per) | Heath forest (HF) | Poles   | <i>Schima walichii</i>               | 4  | 2 | 56.720  | 0.253 | 30.769  | 4.396  | 0.154 | 3.333  | 1.943  | 3.286  | 11.015 | 0.044 | -3.125 | -0.137 |       |        |
| Perpat (Per) | Heath forest (HF) | Poles   | <i>Syzygium syzygioides</i>          | 2  | 2 | 24.204  | 0.046 | 15.385  | 2.198  | 0.154 | 3.333  | 0.354  | 0.598  | 6.130  | 0.022 | -3.818 | -0.084 |       |        |
| Perpat (Per) | Heath forest (HF) | Poles   | <i>Rhodamnia cinerea</i>             | 3  | 3 | 39.236  | 0.121 | 23.077  | 3.297  | 0.231 | 5.000  | 0.930  | 1.573  | 9.869  | 0.033 | -3.412 | -0.112 |       |        |
| Perpat (Per) | Heath forest (HF) | Poles   | <i>Calophyllum pulcherrimum</i>      | 10 | 6 | 144.299 | 1.635 | 76.923  | 10.989 | 0.462 | 10.000 | 12.573 | 21.270 | 42.259 | 0.110 | -2.208 | -0.243 |       |        |
| Perpat (Per) | Heath forest (HF) | Poles   | <i>Symplocos adenophylla</i>         | 1  | 1 | 14.650  | 0.017 | 7.692   | 1.099  | 0.077 | 1.667  | 0.130  | 0.219  | 2.985  | 0.011 | -4.511 | -0.050 |       |        |
| Perpat (Per) | Heath forest (HF) | Poles   | <i>Adinandra dumosa</i>              | 1  | 1 | 10.350  | 0.008 | 7.692   | 1.099  | 0.077 | 1.667  | 0.065  | 0.109  | 2.875  | 0.011 | -4.511 | -0.050 |       |        |
| Perpat (Per) | Heath forest (HF) | Poles   | <i>Syzygium muelleri</i>             | 2  | 2 | 16.561  | 0.022 | 15.385  | 2.198  | 0.154 | 3.333  | 0.166  | 0.280  | 5.811  | 0.022 | -3.818 | -0.084 |       |        |
| Perpat (Per) | Heath forest (HF) | Poles   | <i>Syzygium urceolatum</i>           | 9  | 4 | 125.732 | 1.241 | 69.231  | 9.890  | 0.308 | 6.667  | 9.546  | 16.149 | 32.705 | 0.099 | -2.314 | -0.229 |       |        |
| Perpat (Per) | Heath forest (HF) | Poles   | <i>Litsea accedens</i>               | 2  | 1 | 22.134  | 0.038 | 15.385  | 2.198  | 0.077 | 1.667  | 0.296  | 0.500  | 4.365  | 0.022 | -3.818 | -0.084 |       |        |
| Perpat (Per) | Heath forest (HF) | Poles   | <i>Hopea bilitonensis</i>            | 14 | 4 | 171.019 | 2.296 | 107.692 | 15.385 | 0.308 | 6.667  | 17.661 | 29.877 | 51.928 | 0.154 | -1.872 | -0.288 |       |        |
| Perpat (Per) | Heath forest (HF) | Poles   | <i>Claoxylon longifolium</i>         | 1  | 1 | 16.242  | 0.021 | 7.692   | 1.099  | 0.077 | 1.667  | 0.159  | 0.269  | 3.035  | 0.011 | -4.511 | -0.050 | 3.003 |        |
| Perpat (Per) | Heath forest (HF) | Poles   | <i>Inocarpus fagifer</i>             | 2  | 1 | 24.204  | 0.046 | 15.385  | 2.198  | 0.077 | 1.667  | 0.354  | 0.598  | 4.463  | 0.022 | -3.818 | -0.084 |       |        |
| Perpat (Per) | Heath forest (HF) | Poles   | <i>Syzygium cf. calophyllifolium</i> | 1  | 1 | 13.376  | 0.014 | 7.692   | 1.099  | 0.077 | 1.667  | 0.108  | 0.183  | 2.948  | 0.011 | -4.511 | -0.050 |       |        |
| Perpat (Per) | Heath forest (HF) | Poles   | <i>Baeckea frutescens</i>            | 1  | 1 | 11.783  | 0.011 | 7.692   | 1.099  | 0.077 | 1.667  | 0.084  | 0.142  | 2.907  | 0.011 | -4.511 | -0.050 |       |        |
| Perpat (Per) | Heath forest (HF) | Poles   | <i>Gaertnera sp.</i>                 | 1  | 1 | 10.064  | 0.008 | 7.692   | 1.099  | 0.077 | 1.667  | 0.061  | 0.103  | 2.869  | 0.011 | -4.511 | -0.050 |       |        |
| Perpat (Per) | Heath forest (HF) | Poles   | <i>Planchonella obovata</i>          | 1  | 1 | 14.395  | 0.016 | 7.692   | 1.099  | 0.077 | 1.667  | 0.125  | 0.212  | 2.977  | 0.011 | -4.511 | -0.050 |       |        |
| Perpat (Per) | Heath forest (HF) | Poles   | <i>Alseodaphne bancana</i>           | 2  | 1 | 22.930  | 0.041 | 15.385  | 2.198  | 0.077 | 1.667  | 0.317  | 0.537  | 4.402  | 0.022 | -3.818 | -0.084 |       |        |
| Perpat (Per) | Heath forest (HF) | Poles   | <i>Cratoxylum formosus</i>           | 1  | 1 | 12.197  | 0.012 | 7.692   | 1.099  | 0.077 | 1.667  | 0.090  | 0.152  | 2.918  | 0.011 | -4.511 | -0.050 |       |        |
| Perpat (Per) | Heath forest (HF) | Poles   | <i>Vitex pinnata</i>                 | 3  | 1 | 50.955  | 0.204 | 23.077  | 3.297  | 0.077 | 1.667  | 1.568  | 2.652  | 7.616  | 0.033 | -3.412 | -0.112 |       |        |
| Perpat (Per) | Heath forest (HF) | Poles   | <i>Garcinia celebica</i>             | 1  | 1 | 16.083  | 0.020 | 7.692   | 1.099  | 0.077 | 1.667  | 0.156  | 0.264  | 3.030  | 0.011 | -4.511 | -0.050 |       |        |
| Perpat (Per) | Heath forest (HF) | Poles   | <i>Canthium horridum</i>             | 1  | 1 | 14.904  | 0.017 | 7.692   | 1.099  | 0.077 | 1.667  | 0.134  | 0.227  | 2.992  | 0.011 | -4.511 | -0.050 |       |        |
| Perpat (Per) | Heath forest (HF) | Poles   | <i>Pternandra coerulescens</i>       | 1  | 1 | 12.580  | 0.012 | 7.692   | 1.099  | 0.077 | 1.667  | 0.096  | 0.162  | 2.927  | 0.011 | -4.511 | -0.050 |       |        |
| Perpat (Per) | Heath forest (HF) | Poles   | <i>Eurya glabra</i>                  | 1  | 1 | 19.108  | 0.029 | 7.692   | 1.099  | 0.077 | 1.667  | 0.220  | 0.373  | 3.139  | 0.011 | -4.511 | -0.050 |       |        |
| Perpat (Per) | Heath forest (HF) | Poles   | <i>Ardisia haseltii</i>              | 1  | 1 | 10.350  | 0.008 | 7.692   | 1.099  | 0.077 | 1.667  | 0.065  | 0.109  | 2.875  | 0.011 | -4.511 | -0.050 |       |        |
| Perpat (Per) | Heath forest (HF) | Poles   | <i>Knema cinerea</i>                 | 1  | 1 | 11.783  | 0.011 | 7.692   | 1.099  | 0.077 | 1.667  | 0.084  | 0.142  | 2.907  | 0.011 | -4.511 | -0.050 |       |        |
| Perpat (Per) | Heath forest (HF) | Tree    | <i>Shorea balangeran</i>             | 5  | 3 | 131.561 | 1.359 | 9.615   | 6.849  | 0.231 | 6.383  | 2.613  | 6.260  | 19.493 | 0.068 | -2.681 | -0.184 |       |        |
| Perpat (Per) | Heath forest (HF) | Tree    | <i>Cratoxylum glaucum</i>            | 2  | 1 | 55.096  | 0.238 | 3.846   | 2.740  | 0.077 | 2.128  | 0.458  | 1.098  | 5.965  | 0.027 | -3.597 | -0.099 | 2.922 | 72.556 |
| Perpat (Per) | Heath forest (HF) | Tree    | <i>Schima walichii</i>               | 11 | 3 | 297.452 | 6.946 | 21.154  | 15.068 | 0.231 | 6.383  | 13.357 | 32.003 | 53.454 | 0.151 | -1.893 | -0.285 |       |        |
| Perpat (Per) | Heath forest (HF) | Tree    | <i>Artocarpus cf. glaucus</i>        | 4  | 3 | 91.815  | 0.662 | 7.692   | 5.479  | 0.231 | 6.383  | 1.273  | 3.049  | 14.912 | 0.055 | -2.904 | -0.159 |       |        |

|               |                          |         |                                      |    |   |         |       |          |        |       |        |       |        |        |       |        |        |
|---------------|--------------------------|---------|--------------------------------------|----|---|---------|-------|----------|--------|-------|--------|-------|--------|--------|-------|--------|--------|
| Perpat (Per)  | Heath forest (HF)        | Tree    | <i>Syzygium syzygioides</i>          | 2  | 2 | 60.510  | 0.287 | 3.846    | 2.740  | 0.154 | 4.255  | 0.553 | 1.324  | 8.319  | 0.027 | -3.597 | -0.099 |
| Perpat (Per)  | Heath forest (HF)        | Tree    | <i>Castanopsis costata</i>           | 1  | 1 | 33.121  | 0.086 | 1.923    | 1.370  | 0.077 | 2.128  | 0.166 | 0.397  | 3.894  | 0.014 | -4.290 | -0.059 |
| Perpat (Per)  | Heath forest (HF)        | Tree    | <i>Rhodamnia cinerea</i>             | 1  | 1 | 21.975  | 0.038 | 1.923    | 1.370  | 0.077 | 2.128  | 0.073 | 0.175  | 3.672  | 0.014 | -4.290 | -0.059 |
| Perpat (Per)  | Heath forest (HF)        | Tree    | <i>Lindera lucida</i>                | 2  | 2 | 49.682  | 0.194 | 3.846    | 2.740  | 0.154 | 4.255  | 0.373 | 0.893  | 7.888  | 0.027 | -3.597 | -0.099 |
| Perpat (Per)  | Heath forest (HF)        | Tree    | <i>Syzygium acuminatissima</i>       | 3  | 2 | 60.318  | 0.286 | 5.769    | 4.110  | 0.154 | 4.255  | 0.549 | 1.316  | 9.681  | 0.041 | -3.192 | -0.131 |
| Perpat (Per)  | Heath forest (HF)        | Tree    | <i>Calophyllum pulcherrimum</i>      | 7  | 5 | 178.917 | 2.513 | 13.462   | 9.589  | 0.385 | 10.638 | 4.832 | 11.579 | 31.806 | 0.096 | -2.345 | -0.225 |
| Perpat (Per)  | Heath forest (HF)        | Tree    | <i>Bouea macrophylla</i>             | 2  | 2 | 77.707  | 0.474 | 3.846    | 2.740  | 0.154 | 4.255  | 0.912 | 2.184  | 9.179  | 0.027 | -3.597 | -0.099 |
| Perpat (Per)  | Heath forest (HF)        | Tree    | <i>Adinandra dumosa</i>              | 1  | 1 | 38.854  | 0.119 | 1.923    | 1.370  | 0.077 | 2.128  | 0.228 | 0.546  | 4.044  | 0.014 | -4.290 | -0.059 |
| Perpat (Per)  | Heath forest (HF)        | Tree    | <i>Syzygium muelleri</i>             | 8  | 3 | 212.707 | 3.552 | 15.385   | 10.959 | 0.231 | 6.383  | 6.830 | 16.365 | 33.707 | 0.110 | -2.211 | -0.242 |
| Perpat (Per)  | Heath forest (HF)        | Tree    | <i>Syzygium urceolatum</i>           | 8  | 5 | 213.949 | 3.593 | 15.385   | 10.959 | 0.385 | 10.638 | 6.910 | 16.557 | 38.154 | 0.110 | -2.211 | -0.242 |
| Perpat (Per)  | Heath forest (HF)        | Tree    | <i>Litsea accedens</i>               | 1  | 1 | 26.752  | 0.056 | 1.923    | 1.370  | 0.077 | 2.128  | 0.108 | 0.259  | 3.756  | 0.014 | -4.290 | -0.059 |
| Perpat (Per)  | Heath forest (HF)        | Tree    | <i>Hopea bilitonensis</i>            | 2  | 1 | 57.006  | 0.255 | 3.846    | 2.740  | 0.077 | 2.128  | 0.491 | 1.175  | 6.043  | 0.027 | -3.597 | -0.099 |
| Perpat (Per)  | Heath forest (HF)        | Tree    | <i>Claoxylon longifolium</i>         | 1  | 1 | 23.248  | 0.042 | 1.923    | 1.370  | 0.077 | 2.128  | 0.082 | 0.195  | 3.693  | 0.014 | -4.290 | -0.059 |
| Perpat (Per)  | Heath forest (HF)        | Tree    | <i>Eugenia cerina</i>                | 1  | 1 | 31.051  | 0.076 | 1.923    | 1.370  | 0.077 | 2.128  | 0.146 | 0.349  | 3.846  | 0.014 | -4.290 | -0.059 |
| Perpat (Per)  | Heath forest (HF)        | Tree    | <i>Gaertnera sp.</i>                 | 1  | 1 | 20.478  | 0.033 | 1.923    | 1.370  | 0.077 | 2.128  | 0.063 | 0.152  | 3.649  | 0.014 | -4.290 | -0.059 |
| Perpat (Per)  | Heath forest (HF)        | Tree    | <i>Planchonella obovata</i>          | 1  | 1 | 28.344  | 0.063 | 1.923    | 1.370  | 0.077 | 2.128  | 0.121 | 0.291  | 3.788  | 0.014 | -4.290 | -0.059 |
| Perpat (Per)  | Heath forest (HF)        | Tree    | <i>Cratoxylum formosus</i>           | 2  | 1 | 63.694  | 0.318 | 3.846    | 2.740  | 0.077 | 2.128  | 0.612 | 1.467  | 6.335  | 0.027 | -3.597 | -0.099 |
| Perpat (Per)  | Heath forest (HF)        | Tree    | <i>Tristaniaopsis whiteana</i>       | 2  | 1 | 54.210  | 0.231 | 3.846    | 2.740  | 0.077 | 2.128  | 0.444 | 1.063  | 5.930  | 0.027 | -3.597 | -0.099 |
| Perpat (Per)  | Heath forest (HF)        | Tree    | <i>Elaeocarpus sundaicus</i>         | 1  | 1 | 36.624  | 0.105 | 1.923    | 1.370  | 0.077 | 2.128  | 0.202 | 0.485  | 3.983  | 0.014 | -4.290 | -0.059 |
| Perpat (Per)  | Heath forest (HF)        | Tree    | <i>Diospyros ridleyi</i>             | 1  | 1 | 20.032  | 0.032 | 1.923    | 1.370  | 0.077 | 2.128  | 0.061 | 0.145  | 3.643  | 0.014 | -4.290 | -0.059 |
| Perpat (Per)  | Heath forest (HF)        | Tree    | <i>Ficus benjamina</i>               | 1  | 1 | 29.000  | 0.066 | 1.923    | 1.370  | 0.077 | 2.128  | 0.127 | 0.304  | 3.802  | 0.014 | -4.290 | -0.059 |
| Perpat (Per)  | Heath forest (HF)        | Tree    | <i>Eurya glabra</i>                  | 1  | 1 | 24.841  | 0.048 | 1.923    | 1.370  | 0.077 | 2.128  | 0.093 | 0.223  | 3.721  | 0.014 | -4.290 | -0.059 |
| Perpat (Per)  | Heath forest (HF)        | Tree    | <i>Ilex cynosa</i>                   | 1  | 1 | 20.064  | 0.032 | 1.923    | 1.370  | 0.077 | 2.128  | 0.061 | 0.146  | 3.643  | 0.014 | -4.290 | -0.059 |
| Kembiri (Kem) | Swamp heath forest (SHF) | Sapling | <i>Melaleuca cajuputi</i>            | 12 | 5 | -       | -     | 480.000  | 4.819  | 0.500 | 7.576  | -     | -      | 12.395 | 0.048 | -3.033 | -0.146 |
| Kembiri (Kem) | Swamp heath forest (SHF) | Sapling | <i>Cratoxylum glaucum</i>            | 4  | 2 | -       | -     | 160.000  | 1.606  | 0.200 | 3.030  | -     | -      | 4.637  | 0.016 | -4.131 | -0.066 |
| Kembiri (Kem) | Swamp heath forest (SHF) | Sapling | <i>Calophyllum lanigerum</i>         | 10 | 5 | -       | -     | 400.000  | 4.016  | 0.500 | 7.576  | -     | -      | 11.592 | 0.040 | -3.215 | -0.129 |
| Kembiri (Kem) | Swamp heath forest (SHF) | Sapling | <i>Melicope denhamii</i>             | 13 | 5 | -       | -     | 520.000  | 5.221  | 0.500 | 7.576  | -     | -      | 12.797 | 0.052 | -2.953 | -0.154 |
| Kembiri (Kem) | Swamp heath forest (SHF) | Sapling | <i>Cratoxylum formosus</i>           | 1  | 1 | -       | -     | 40.000   | 0.402  | 0.100 | 1.515  | -     | -      | 1.917  | 0.004 | -5.517 | -0.022 |
| Kembiri (Kem) | Swamp heath forest (SHF) | Sapling | <i>Dillenia suffruticosa</i>         | 38 | 6 | -       | -     | 1520.000 | 15.261 | 0.600 | 9.091  | -     | -      | 24.352 | 0.153 | -1.880 | -0.287 |
| Kembiri (Kem) | Swamp heath forest (SHF) | Sapling | <i>Calophyllum soulattri</i>         | 1  | 1 | -       | -     | 40.000   | 0.402  | 0.100 | 1.515  | -     | -      | 1.917  | 0.004 | -5.517 | -0.022 |
| Kembiri (Kem) | Swamp heath forest (SHF) | Sapling | <i>Cryptocaria densiflora</i>        | 1  | 2 | -       | -     | 40.000   | 0.402  | 0.200 | 3.030  | -     | -      | 3.432  | 0.004 | -5.517 | -0.022 |
| Kembiri (Kem) | Swamp heath forest (SHF) | Sapling | <i>Leea aculeata</i>                 | 1  | 1 | -       | -     | 40.000   | 0.402  | 0.100 | 1.515  | -     | -      | 1.917  | 0.004 | -5.517 | -0.022 |
| Kembiri (Kem) | Swamp heath forest (SHF) | Sapling | <i>Syzygium racemosum</i>            | 14 | 4 | -       | -     | 560.000  | 5.622  | 0.400 | 6.061  | -     | -      | 11.683 | 0.056 | -2.878 | -0.162 |
| Kembiri (Kem) | Swamp heath forest (SHF) | Sapling | <i>Lindera lucida</i>                | 2  | 2 | -       | -     | 80.000   | 0.803  | 0.200 | 3.030  | -     | -      | 3.834  | 0.008 | -4.824 | -0.039 |
| Kembiri (Kem) | Swamp heath forest (SHF) | Sapling | <i>Decaspermum parviflorum</i>       | 3  | 2 | -       | -     | 120.000  | 1.205  | 0.200 | 3.030  | -     | -      | 4.235  | 0.012 | -4.419 | -0.053 |
| Kembiri (Kem) | Swamp heath forest (SHF) | Sapling | <i>Diospyros ridleyi</i>             | 3  | 1 | -       | -     | 120.000  | 1.205  | 0.100 | 1.515  | -     | -      | 2.720  | 0.012 | -4.419 | -0.053 |
| Kembiri (Kem) | Swamp heath forest (SHF) | Sapling | <i>Hopea bilitonensis</i>            | 2  | 1 | -       | -     | 80.000   | 0.803  | 0.100 | 1.515  | -     | -      | 2.318  | 0.008 | -4.824 | -0.039 |
| Kembiri (Kem) | Swamp heath forest (SHF) | Sapling | <i>Syzygium urceolatum</i>           | 1  | 1 | -       | -     | 40.000   | 0.402  | 0.100 | 1.515  | -     | -      | 1.917  | 0.004 | -5.517 | -0.022 |
| Kembiri (Kem) | Swamp heath forest (SHF) | Sapling | <i>Barringtonia reticulata</i>       | 1  | 1 | -       | -     | 40.000   | 0.402  | 0.100 | 1.515  | -     | -      | 1.917  | 0.004 | -5.517 | -0.022 |
| Kembiri (Kem) | Swamp heath forest (SHF) | Sapling | <i>Pternandra coerulescens</i>       | 5  | 2 | -       | -     | 200.000  | 2.008  | 0.200 | 3.030  | -     | -      | 5.038  | 0.020 | -3.908 | -0.078 |
| Kembiri (Kem) | Swamp heath forest (SHF) | Sapling | <i>Garcinia parvifolia</i>           | 1  | 1 | -       | -     | 40.000   | 0.402  | 0.100 | 1.515  | -     | -      | 1.917  | 0.004 | -5.517 | -0.022 |
| Kembiri (Kem) | Swamp heath forest (SHF) | Sapling | <i>Aporosa frutescens</i>            | 1  | 1 | -       | -     | 40.000   | 0.402  | 0.100 | 1.515  | -     | -      | 1.917  | 0.004 | -5.517 | -0.022 |
| Kembiri (Kem) | Swamp heath forest (SHF) | Sapling | <i>Ardisia haseltii</i>              | 34 | 1 | -       | -     | 1360.000 | 13.655 | 0.100 | 1.515  | -     | -      | 15.170 | 0.137 | -1.991 | -0.272 |
| Kembiri (Kem) | Swamp heath forest (SHF) | Sapling | <i>Syzygium zeylanicum</i>           | 42 | 2 | -       | -     | 1680.000 | 16.867 | 0.200 | 3.030  | -     | -      | 19.898 | 0.169 | -1.780 | -0.300 |
| Kembiri (Kem) | Swamp heath forest (SHF) | Sapling | <i>Melastoma malabathricum</i>       | 4  | 1 | -       | -     | 160.000  | 1.606  | 0.100 | 1.515  | -     | -      | 3.122  | 0.016 | -4.131 | -0.066 |
| Kembiri (Kem) | Swamp heath forest (SHF) | Sapling | <i>Syzygium cf. calophyllifolium</i> | 2  | 2 | -       | -     | 80.000   | 0.803  | 0.200 | 3.030  | -     | -      | 3.834  | 0.008 | -4.824 | -0.039 |
| Kembiri (Kem) | Swamp heath forest (SHF) | Sapling | <i>Calophyllum pulcherrimum</i>      | 1  | 1 | -       | -     | 40.000   | 0.402  | 0.100 | 1.515  | -     | -      | 1.917  | 0.004 | -5.517 | -0.022 |
| Kembiri (Kem) | Swamp heath forest (SHF) | Sapling | <i>Baeckea frutescens</i>            | 28 | 1 | -       | -     | 1120.000 | 11.245 | 0.100 | 1.515  | -     | -      | 12.760 | 0.112 | -2.185 | -0.246 |
| Kembiri (Kem) | Swamp heath forest (SHF) | Sapling | <i>Rhodomyrtus tomentosa</i>         | 1  | 1 | -       | -     | 40.000   | 0.402  | 0.100 | 1.515  | -     | -      | 1.917  | 0.004 | -5.517 | -0.022 |
| Kembiri (Kem) | Swamp heath forest (SHF) | Sapling | <i>Sterculia cf. foetida</i>         | 3  | 1 | -       | -     | 120.000  | 1.205  | 0.100 | 1.515  | -     | -      | 2.720  | 0.012 | -4.419 | -0.053 |
| Kembiri (Kem) | Swamp heath forest (SHF) | Sapling | <i>Syzygium foxworthianum</i>        | 1  | 1 | -       | -     | 40.000   | 0.402  | 0.100 | 1.515  | -     | -      | 1.917  | 0.004 | -5.517 | -0.022 |
| Kembiri (Kem) | Swamp heath forest (SHF) | Sapling | <i>Garcinia lateriflora</i>          | 1  | 1 | -       | -     | 40.000   | 0.402  | 0.100 | 1.515  | -     | -      | 1.917  | 0.004 | -5.517 | -0.022 |
| Kembiri (Kem) | Swamp heath forest (SHF) | Sapling | <i>Tristaniaopsis obovata</i>        | 1  | 1 | -       | -     | 40.000   | 0.402  | 0.100 | 1.515  | -     | -      | 1.917  | 0.004 | -5.517 | -0.022 |
| Kembiri (Kem) | Swamp heath forest (SHF) | Sapling | <i>Syzygium decipiens</i>            | 1  | 1 | -       | -     | 40.000   | 0.402  | 0.100 | 1.515  | -     | -      | 1.917  | 0.004 | -5.517 | -0.022 |

|               |                          |                   |                                      |    |   |         |       |           |        |       |        |        |        |         |       |        |        |       |
|---------------|--------------------------|-------------------|--------------------------------------|----|---|---------|-------|-----------|--------|-------|--------|--------|--------|---------|-------|--------|--------|-------|
| Kembiri (Kem) | Swamp heath forest (SHF) | Sapling           | <i>Macaranga hosei</i>               | 1  | 1 | -       | -     | 40.000    | 0.402  | 0.100 | 1.515  | -      | -      | 1.917   | 0.004 | -5.517 | -0.022 |       |
| Kembiri (Kem) | Swamp heath forest (SHF) | Sapling           | <i>Strobocalyx arborea</i>           | 2  | 2 | -       | -     | 80.000    | 0.803  | 0.200 | 3.030  | -      | -      | 3.834   | 0.008 | -4.824 | -0.039 |       |
| Kembiri (Kem) | Swamp heath forest (SHF) | Sapling           | <i>Glochidion arborescens</i>        | 1  | 1 | -       | -     | 40.000    | 0.402  | 0.100 | 1.515  | -      | -      | 1.917   | 0.004 | -5.517 | -0.022 |       |
| Kembiri (Kem) | Swamp heath forest (SHF) | Sapling           | <i>Ilex cymosa</i>                   | 10 | 2 | -       | -     | 400.000   | 4.016  | 0.200 | 3.030  | -      | -      | 7.046   | 0.040 | -3.215 | -0.129 |       |
| Kembiri (Kem) | Swamp heath forest (SHF) | Sapling           | <i>Syzygium palembanicum</i>         | 1  | 1 | -       | -     | 40.000    | 0.402  | 0.100 | 1.515  | -      | -      | 1.917   | 0.004 | -5.517 | -0.022 |       |
| Kembiri (Kem) | Swamp heath forest (SHF) | Sapling           | <i>Macaranga triloba</i>             | 1  | 1 | -       | -     | 40.000    | 0.402  | 0.100 | 1.515  | -      | -      | 1.917   | 0.004 | -5.517 | -0.022 |       |
| Kembiri (Kem) | Swamp heath forest (SHF) | Seedling and herb | <i>Melaleuca cajuputi</i>            | 9  | 1 | -       | -     | 2250.000  | 2.338  | 0.100 | 1.299  | -      | -      | 3.636   | 0.023 | -3.756 | -0.088 |       |
| Kembiri (Kem) | Swamp heath forest (SHF) | Seedling and herb | <i>Calophyllum lanigerum</i>         | 5  | 3 | -       | -     | 1250.000  | 1.299  | 0.300 | 3.896  | -      | -      | 5.195   | 0.013 | -4.344 | -0.056 |       |
| Kembiri (Kem) | Swamp heath forest (SHF) | Seedling and herb | <i>Melicope denhamii</i>             | 2  | 1 | -       | -     | 500.000   | 0.519  | 0.100 | 1.299  | -      | -      | 1.818   | 0.005 | -5.260 | -0.027 |       |
| Kembiri (Kem) | Swamp heath forest (SHF) | Seedling and herb | <i>Cratogeomys formosus</i>          | 1  | 1 | -       | -     | 250.000   | 0.260  | 0.100 | 1.299  | -      | -      | 1.558   | 0.003 | -5.953 | -0.015 |       |
| Kembiri (Kem) | Swamp heath forest (SHF) | Seedling and herb | <i>Dillenia suffruticosa</i>         | 22 | 5 | -       | -     | 5500.000  | 5.714  | 0.500 | 6.494  | -      | -      | 12.208  | 0.057 | -2.862 | -0.164 |       |
| Kembiri (Kem) | Swamp heath forest (SHF) | Seedling and herb | <i>Cryptocaria densiflora</i>        | 1  | 1 | -       | -     | 250.000   | 0.260  | 0.100 | 1.299  | -      | -      | 1.558   | 0.003 | -5.953 | -0.015 |       |
| Kembiri (Kem) | Swamp heath forest (SHF) | Seedling and herb | <i>Eugenia leptantha</i>             | 36 | 3 | -       | -     | 9000.000  | 9.351  | 0.300 | 3.896  | -      | -      | 13.247  | 0.094 | -2.370 | -0.222 |       |
| Kembiri (Kem) | Swamp heath forest (SHF) | Seedling and herb | <i>Claoxylon longifolium</i>         | 5  | 1 | -       | -     | 1250.000  | 1.299  | 0.100 | 1.299  | -      | -      | 2.597   | 0.013 | -4.344 | -0.056 |       |
| Kembiri (Kem) | Swamp heath forest (SHF) | Seedling and herb | <i>Scleria sp</i>                    | 25 | 5 | -       | -     | 6250.000  | 6.494  | 0.500 | 6.494  | -      | -      | 12.987  | 0.065 | -2.734 | -0.178 |       |
| Kembiri (Kem) | Swamp heath forest (SHF) | Seedling and herb | <i>Stenochlaena palustris</i>        | 22 | 5 | -       | -     | 5500.000  | 5.714  | 0.500 | 6.494  | -      | -      | 12.208  | 0.057 | -2.862 | -0.164 |       |
| Kembiri (Kem) | Swamp heath forest (SHF) | Seedling and herb | <i>Alpinia oxymitra</i>              | 10 | 4 | -       | -     | 2500.000  | 2.597  | 0.400 | 5.195  | -      | -      | 7.792   | 0.026 | -3.651 | -0.095 |       |
| Kembiri (Kem) | Swamp heath forest (SHF) | Seedling and herb | <i>Psychotria malayana</i>           | 13 | 3 | -       | -     | 3250.000  | 3.377  | 0.300 | 3.896  | -      | -      | 7.273   | 0.034 | -3.388 | -0.114 |       |
| Kembiri (Kem) | Swamp heath forest (SHF) | Seedling and herb | <i>Leea aculeata</i>                 | 1  | 1 | -       | -     | 250.000   | 0.260  | 0.100 | 1.299  | -      | -      | 1.558   | 0.003 | -5.953 | -0.015 |       |
| Kembiri (Kem) | Swamp heath forest (SHF) | Seedling and herb | <i>Syzygium racemosum</i>            | 1  | 1 | -       | -     | 250.000   | 0.260  | 0.100 | 1.299  | -      | -      | 1.558   | 0.003 | -5.953 | -0.015 |       |
| Kembiri (Kem) | Swamp heath forest (SHF) | Seedling and herb | <i>Decaspermum parviflorum</i>       | 17 | 1 | -       | -     | 4250.000  | 4.416  | 0.100 | 1.299  | -      | -      | 5.714   | 0.044 | -3.120 | -0.138 |       |
| Kembiri (Kem) | Swamp heath forest (SHF) | Seedling and herb | <i>Syzygium bankense</i>             | 2  | 1 | -       | -     | 500.000   | 0.519  | 0.100 | 1.299  | -      | -      | 1.818   | 0.005 | -5.260 | -0.027 |       |
| Kembiri (Kem) | Swamp heath forest (SHF) | Seedling and herb | <i>Nephrolepis sp.</i>               | 15 | 2 | -       | -     | 3750.000  | 3.896  | 0.200 | 2.597  | -      | -      | 6.494   | 0.039 | -3.245 | -0.126 |       |
| Kembiri (Kem) | Swamp heath forest (SHF) | Seedling and herb | <i>Daemonorops angustifolia</i>      | 2  | 1 | -       | -     | 500.000   | 0.519  | 0.100 | 1.299  | -      | -      | 1.818   | 0.005 | -5.260 | -0.027 |       |
| Kembiri (Kem) | Swamp heath forest (SHF) | Seedling and herb | <i>Syzygium urceolatum</i>           | 13 | 2 | -       | -     | 3250.000  | 3.377  | 0.200 | 2.597  | -      | -      | 5.974   | 0.034 | -3.388 | -0.114 |       |
| Kembiri (Kem) | Swamp heath forest (SHF) | Seedling and herb | <i>Aeschynanthus cf. horsfieldii</i> | 1  | 1 | -       | -     | 250.000   | 0.260  | 0.100 | 1.299  | -      | -      | 1.558   | 0.003 | -5.953 | -0.015 |       |
| Kembiri (Kem) | Swamp heath forest (SHF) | Seedling and herb | <i>Ficus punctata</i>                | 6  | 2 | -       | -     | 1500.000  | 1.558  | 0.200 | 2.597  | -      | -      | 4.156   | 0.016 | -4.161 | -0.065 | 3.087 |
| Kembiri (Kem) | Swamp heath forest (SHF) | Seedling and herb | <i>Garcinia parvifolia</i>           | 3  | 2 | -       | -     | 750.000   | 0.779  | 0.200 | 2.597  | -      | -      | 3.377   | 0.008 | -4.855 | -0.038 |       |
| Kembiri (Kem) | Swamp heath forest (SHF) | Seedling and herb | <i>Aporosa frutescens</i>            | 1  | 1 | -       | -     | 250.000   | 0.260  | 0.100 | 1.299  | -      | -      | 1.558   | 0.003 | -5.953 | -0.015 |       |
| Kembiri (Kem) | Swamp heath forest (SHF) | Seedling and herb | <i>Barringtonia sp.</i>              | 2  | 1 | -       | -     | 500.000   | 0.519  | 0.100 | 1.299  | -      | -      | 1.818   | 0.005 | -5.260 | -0.027 |       |
| Kembiri (Kem) | Swamp heath forest (SHF) | Seedling and herb | <i>Neouvaria acuminatissima</i>      | 5  | 2 | -       | -     | 1250.000  | 1.299  | 0.200 | 2.597  | -      | -      | 3.896   | 0.013 | -4.344 | -0.056 |       |
| Kembiri (Kem) | Swamp heath forest (SHF) | Seedling and herb | <i>Syzygium muelleri</i>             | 1  | 1 | -       | -     | 250.000   | 0.260  | 0.100 | 1.299  | -      | -      | 1.558   | 0.003 | -5.953 | -0.015 |       |
| Kembiri (Kem) | Swamp heath forest (SHF) | Seedling and herb | <i>Korthalsia flagellaris</i>        | 1  | 1 | -       | -     | 250.000   | 0.260  | 0.100 | 1.299  | -      | -      | 1.558   | 0.003 | -5.953 | -0.015 |       |
| Kembiri (Kem) | Swamp heath forest (SHF) | Seedling and herb | <i>Ardisia haseltii</i>              | 1  | 1 | -       | -     | 250.000   | 0.260  | 0.100 | 1.299  | -      | -      | 1.558   | 0.003 | -5.953 | -0.015 |       |
| Kembiri (Kem) | Swamp heath forest (SHF) | Seedling and herb | <i>Syzygium zeylanicum</i>           | 12 | 4 | -       | -     | 3000.000  | 3.117  | 0.400 | 5.195  | -      | -      | 8.312   | 0.031 | -3.468 | -0.108 |       |
| Kembiri (Kem) | Swamp heath forest (SHF) | Seedling and herb | <i>Wikstroemia androsaemifolia</i>   | 1  | 1 | -       | -     | 250.000   | 0.260  | 0.100 | 1.299  | -      | -      | 1.558   | 0.003 | -5.953 | -0.015 |       |
| Kembiri (Kem) | Swamp heath forest (SHF) | Seedling and herb | <i>Melastoma malabathricum</i>       | 11 | 3 | -       | -     | 2750.000  | 2.857  | 0.300 | 3.896  | -      | -      | 6.753   | 0.029 | -3.555 | -0.102 |       |
| Kembiri (Kem) | Swamp heath forest (SHF) | Seedling and herb | <i>Oldenlandia biflora</i>           | 16 | 4 | -       | -     | 4000.000  | 4.156  | 0.400 | 5.195  | -      | -      | 9.351   | 0.042 | -3.181 | -0.132 |       |
| Kembiri (Kem) | Swamp heath forest (SHF) | Seedling and herb | <i>Syzygium cf. calophyllifolium</i> | 1  | 1 | -       | -     | 250.000   | 0.260  | 0.100 | 1.299  | -      | -      | 1.558   | 0.003 | -5.953 | -0.015 |       |
| Kembiri (Kem) | Swamp heath forest (SHF) | Seedling and herb | <i>Garcinia lateriflora</i>          | 45 | 1 | -       | -     | 11250.000 | 11.688 | 0.100 | 1.299  | -      | -      | 12.987  | 0.117 | -2.147 | -0.251 |       |
| Kembiri (Kem) | Swamp heath forest (SHF) | Seedling and herb | <i>Calophyllum pulcherrimum</i>      | 2  | 2 | -       | -     | 500.000   | 0.519  | 0.200 | 2.597  | -      | -      | 3.117   | 0.005 | -5.260 | -0.027 |       |
| Kembiri (Kem) | Swamp heath forest (SHF) | Seedling and herb | <i>Baeckea frutescens</i>            | 9  | 1 | -       | -     | 2250.000  | 2.338  | 0.100 | 1.299  | -      | -      | 3.636   | 0.023 | -3.756 | -0.088 |       |
| Kembiri (Kem) | Swamp heath forest (SHF) | Seedling and herb | <i>Rhodomyrtus tomentosa</i>         | 2  | 1 | -       | -     | 500.000   | 0.519  | 0.100 | 1.299  | -      | -      | 1.818   | 0.005 | -5.260 | -0.027 |       |
| Kembiri (Kem) | Swamp heath forest (SHF) | Seedling and herb | <i>Eriocaulon willdenovianum</i>     | 53 | 1 | -       | -     | 13250.000 | 13.766 | 0.100 | 1.299  | -      | -      | 15.065  | 0.138 | -1.983 | -0.273 |       |
| Kembiri (Kem) | Swamp heath forest (SHF) | Seedling and herb | <i>Syzygium decipiens</i>            | 1  | 1 | -       | -     | 250.000   | 0.260  | 0.100 | 1.299  | -      | -      | 1.558   | 0.003 | -5.953 | -0.015 |       |
| Kembiri (Kem) | Swamp heath forest (SHF) | Seedling and herb | <i>Dicranopteris linearis</i>        | 4  | 1 | -       | -     | 1000.000  | 1.039  | 0.100 | 1.299  | -      | -      | 2.338   | 0.010 | -4.567 | -0.047 |       |
| Kembiri (Kem) | Swamp heath forest (SHF) | Seedling and herb | <i>Alpinia aquatica</i>              | 1  | 1 | -       | -     | 250.000   | 0.260  | 0.100 | 1.299  | -      | -      | 1.558   | 0.003 | -5.953 | -0.015 |       |
| Kembiri (Kem) | Swamp heath forest (SHF) | Seedling and herb | <i>Epipremnum aureum</i>             | 4  | 1 | -       | -     | 1000.000  | 1.039  | 0.100 | 1.299  | -      | -      | 2.338   | 0.010 | -4.567 | -0.047 |       |
| Kembiri (Kem) | Swamp heath forest (SHF) | Poles             | <i>Helicia robusta</i>               | 1  | 1 | 19.427  | 0.030 | 10.000    | 1.316  | 0.100 | 2.564  | 0.296  | 0.264  | 4.144   | 0.013 | -4.331 | -0.057 |       |
| Kembiri (Kem) | Swamp heath forest (SHF) | Poles             | <i>Melaleuca cajuputi</i>            | 23 | 7 | 308.439 | 7.468 | 230.000   | 30.263 | 0.700 | 17.949 | 74.681 | 66.470 | 114.682 | 0.303 | -1.195 | -0.362 |       |
| Kembiri (Kem) | Swamp heath forest (SHF) | Poles             | <i>Vitex pinnata</i>                 | 1  | 1 | 12.698  | 0.013 | 10.000    | 1.316  | 0.100 | 2.564  | 0.127  | 0.113  | 3.993   | 0.013 | -4.331 | -0.057 | 2.571 |
| Kembiri (Kem) | Swamp heath forest (SHF) | Poles             | <i>Dillenia suffruticosa</i>         | 1  | 1 | 10.510  | 0.009 | 10.000    | 1.316  | 0.100 | 2.564  | 0.087  | 0.077  | 3.957   | 0.013 | -4.331 | -0.057 |       |
| Kembiri (Kem) | Swamp heath forest (SHF) | Poles             | <i>Syzygium urceolatum</i>           | 3  | 2 | 37.675  | 0.111 | 30.000    | 3.947  | 0.200 | 5.128  | 1.114  | 0.992  | 10.067  | 0.039 | -3.232 | -0.128 |       |

|                        |                          |                   |                                          |    |   |         |        |           |        |       |        |        |        |         |       |        |        |       |             |
|------------------------|--------------------------|-------------------|------------------------------------------|----|---|---------|--------|-----------|--------|-------|--------|--------|--------|---------|-------|--------|--------|-------|-------------|
| Kembiri (Kem)          | Swamp heath forest (SHF) | Poles             | <i>Decaspermum parviflorum</i>           | 2  | 2 | 29.936  | 0.070  | 20.000    | 2.632  | 0.200 | 5.128  | 0.704  | 0.626  | 8.386   | 0.026 | -3.638 | -0.096 |       |             |
| Kembiri (Kem)          | Swamp heath forest (SHF) | Poles             | <i>Schima walichii</i>                   | 3  | 2 | 51.274  | 0.206  | 30.000    | 3.947  | 0.200 | 5.128  | 2.064  | 1.837  | 10.912  | 0.039 | -3.232 | -0.128 |       |             |
| Kembiri (Kem)          | Swamp heath forest (SHF) | Poles             | <i>Lindera lucida</i>                    | 3  | 3 | 40.287  | 0.127  | 30.000    | 3.947  | 0.300 | 7.692  | 1.274  | 1.134  | 12.774  | 0.039 | -3.232 | -0.128 |       |             |
| Kembiri (Kem)          | Swamp heath forest (SHF) | Poles             | <i>Tristaniaopsis obovata</i>            | 1  | 1 | 12.420  | 0.012  | 10.000    | 1.316  | 0.100 | 2.564  | 0.121  | 0.108  | 3.988   | 0.013 | -4.331 | -0.057 |       |             |
| Kembiri (Kem)          | Swamp heath forest (SHF) | Poles             | <i>Aporosa frutescens</i>                | 1  | 1 | 14.650  | 0.017  | 10.000    | 1.316  | 0.100 | 2.564  | 0.168  | 0.150  | 4.030   | 0.013 | -4.331 | -0.057 |       |             |
| Kembiri (Kem)          | Swamp heath forest (SHF) | Poles             | <i>Calophyllum lanigerum</i>             | 4  | 2 | 59.236  | 0.275  | 40.000    | 5.263  | 0.200 | 5.128  | 2.754  | 2.452  | 12.843  | 0.053 | -2.944 | -0.155 |       |             |
| Kembiri (Kem)          | Swamp heath forest (SHF) | Poles             | <i>Albizia procera</i>                   | 1  | 1 | 12.102  | 0.011  | 10.000    | 1.316  | 0.100 | 2.564  | 0.115  | 0.102  | 3.982   | 0.013 | -4.331 | -0.057 |       |             |
| Kembiri (Kem)          | Swamp heath forest (SHF) | Poles             | <i>Pternandra coerulescens</i>           | 5  | 1 | 70.701  | 0.392  | 50.000    | 6.579  | 0.100 | 2.564  | 3.924  | 3.492  | 12.636  | 0.066 | -2.721 | -0.179 |       |             |
| Kembiri (Kem)          | Swamp heath forest (SHF) | Poles             | <i>Syzygium racemosum</i>                | 1  | 1 | 39.809  | 0.124  | 10.000    | 1.316  | 0.100 | 2.564  | 1.244  | 1.107  | 4.987   | 0.013 | -4.331 | -0.057 |       |             |
| Kembiri (Kem)          | Swamp heath forest (SHF) | Poles             | <i>Rhodamnia cinerea</i>                 | 1  | 1 | 15.287  | 0.018  | 10.000    | 1.316  | 0.100 | 2.564  | 0.183  | 0.163  | 4.043   | 0.013 | -4.331 | -0.057 |       |             |
| Kembiri (Kem)          | Swamp heath forest (SHF) | Poles             | <i>Cryptocaria densiflora</i>            | 1  | 1 | 13.057  | 0.013  | 10.000    | 1.316  | 0.100 | 2.564  | 0.134  | 0.119  | 3.999   | 0.013 | -4.331 | -0.057 |       |             |
| Kembiri (Kem)          | Swamp heath forest (SHF) | Poles             | <i>Baeckea frutescens</i>                | 12 | 1 | 155.573 | 1.900  | 120.000   | 15.789 | 0.100 | 2.564  | 18.999 | 16.911 | 35.264  | 0.158 | -1.846 | -0.291 |       |             |
| Kembiri (Kem)          | Swamp heath forest (SHF) | Poles             | <i>Calophyllum pulcherrimum</i>          | 1  | 1 | 13.694  | 0.015  | 10.000    | 1.316  | 0.100 | 2.564  | 0.147  | 0.131  | 4.011   | 0.013 | -4.331 | -0.057 |       |             |
| Kembiri (Kem)          | Swamp heath forest (SHF) | Poles             | <i>Adinandra dumosa</i>                  | 1  | 1 | 18.153  | 0.026  | 10.000    | 1.316  | 0.100 | 2.564  | 0.259  | 0.230  | 4.110   | 0.013 | -4.331 | -0.057 |       |             |
| Kembiri (Kem)          | Swamp heath forest (SHF) | Poles             | <i>Syzygium cf. calophyllifolium</i>     | 1  | 1 | 15.127  | 0.018  | 10.000    | 1.316  | 0.100 | 2.564  | 0.180  | 0.160  | 4.040   | 0.013 | -4.331 | -0.057 |       |             |
| Kembiri (Kem)          | Swamp heath forest (SHF) | Poles             | <i>Styphelia malayana</i>                | 2  | 1 | 31.688  | 0.079  | 20.000    | 2.632  | 0.100 | 2.564  | 0.788  | 0.702  | 5.897   | 0.026 | -3.638 | -0.096 |       |             |
| Kembiri (Kem)          | Swamp heath forest (SHF) | Poles             | <i>Strobocalyx arborea</i>               | 4  | 3 | 57.962  | 0.264  | 40.000    | 5.263  | 0.300 | 7.692  | 2.637  | 2.347  | 15.303  | 0.053 | -2.944 | -0.155 |       |             |
| Kembiri (Kem)          | Swamp heath forest (SHF) | Poles             | <i>Glochidion arborescens</i>            | 1  | 1 | 10.350  | 0.008  | 10.000    | 1.316  | 0.100 | 2.564  | 0.084  | 0.075  | 3.955   | 0.013 | -4.331 | -0.057 |       |             |
| Kembiri (Kem)          | Swamp heath forest (SHF) | Poles             | <i>Syzygium palembanicum</i>             | 1  | 1 | 12.739  | 0.013  | 10.000    | 1.316  | 0.100 | 2.564  | 0.127  | 0.113  | 3.993   | 0.013 | -4.331 | -0.057 |       |             |
| Kembiri (Kem)          | Swamp heath forest (SHF) | Poles             | <i>Ficus variegata</i>                   | 1  | 1 | 13.376  | 0.014  | 10.000    | 1.316  | 0.100 | 2.564  | 0.140  | 0.125  | 4.005   | 0.013 | -4.331 | -0.057 |       |             |
| Kembiri (Kem)          | Swamp heath forest (SHF) | tree              | <i>Helicia robusta</i>                   | 1  | 1 | 46.815  | 0.172  | 2.500     | 2.857  | 0.100 | 4.545  | 0.430  | 0.743  | 8.146   | 0.029 | -3.555 | -0.102 |       |             |
| Kembiri (Kem)          | Swamp heath forest (SHF) | tree              | <i>Melaleuca cajuputi</i>                | 13 | 5 | 496.497 | 19.351 | 32.500    | 37.143 | 0.500 | 22.727 | 48.377 | 83.592 | 143.463 | 0.371 | -0.990 | -0.368 |       |             |
| Kembiri (Kem)          | Swamp heath forest (SHF) | tree              | <i>Cratoxylum glaucum</i>                | 4  | 2 | 89.809  | 0.633  | 10.000    | 11.429 | 0.200 | 9.091  | 1.583  | 2.735  | 23.255  | 0.114 | -2.169 | -0.248 |       |             |
| Kembiri (Kem)          | Swamp heath forest (SHF) | tree              | <i>Syzygium urceolatum</i>               | 4  | 3 | 104.777 | 0.862  | 10.000    | 11.429 | 0.300 | 13.636 | 2.154  | 3.723  | 28.788  | 0.114 | -2.169 | -0.248 |       |             |
| Kembiri (Kem)          | Swamp heath forest (SHF) | tree              | <i>Lepisanthes alata</i>                 | 1  | 1 | 35.669  | 0.100  | 2.500     | 2.857  | 0.100 | 4.545  | 0.250  | 0.431  | 7.834   | 0.029 | -3.555 | -0.102 |       |             |
| Kembiri (Kem)          | Swamp heath forest (SHF) | tree              | <i>Antidesma cuspidatum</i>              | 1  | 1 | 20.382  | 0.033  | 2.500     | 2.857  | 0.100 | 4.545  | 0.082  | 0.141  | 7.543   | 0.029 | -3.555 | -0.102 |       |             |
| Kembiri (Kem)          | Swamp heath forest (SHF) | tree              | <i>Decaspermum parviflorum</i>           | 2  | 2 | 52.866  | 0.219  | 5.000     | 5.714  | 0.200 | 9.091  | 0.548  | 0.948  | 15.753  | 0.057 | -2.862 | -0.164 | 2.016 | 93.16613588 |
| Kembiri (Kem)          | Swamp heath forest (SHF) | tree              | <i>Schima walichii</i>                   | 5  | 3 | 132.166 | 1.371  | 12.500    | 14.286 | 0.300 | 13.636 | 3.428  | 5.923  | 33.845  | 0.143 | -1.946 | -0.278 |       |             |
| Kembiri (Kem)          | Swamp heath forest (SHF) | tree              | <i>Ilex cymosa</i>                       | 1  | 1 | 46.815  | 0.172  | 2.500     | 2.857  | 0.100 | 4.545  | 0.430  | 0.743  | 8.146   | 0.029 | -3.555 | -0.102 |       |             |
| Kembiri (Kem)          | Swamp heath forest (SHF) | tree              | <i>Ficus curtipes</i>                    | 1  | 1 | 39.809  | 0.124  | 2.500     | 2.857  | 0.100 | 4.545  | 0.311  | 0.537  | 7.940   | 0.029 | -3.555 | -0.102 |       |             |
| Kembiri (Kem)          | Swamp heath forest (SHF) | tree              | <i>Garcinia celebica</i>                 | 1  | 1 | 31.210  | 0.076  | 2.500     | 2.857  | 0.100 | 4.545  | 0.191  | 0.330  | 7.733   | 0.029 | -3.555 | -0.102 |       |             |
| Kembiri (Kem)          | Swamp heath forest (SHF) | tree              | <i>Canthium horridum</i>                 | 1  | 1 | 21.178  | 0.035  | 2.500     | 2.857  | 0.100 | 4.545  | 0.088  | 0.152  | 7.555   | 0.029 | -3.555 | -0.102 |       |             |
| Kembiri (Kem)          | Mangrove (MF)            | Seedling and herb | <i>Bruguiera gymnorhiza</i>              | 8  | 2 | -       | -      | 5000.000  | 15.385 | 0.500 | 28.571 | -      | -      | 43.956  | 0.250 | -1.386 | -0.347 |       |             |
| Kembiri (Kem)          | Mangrove (MF)            | Seedling and herb | <i>Ardisia lanceolata</i>                | 13 | 3 | -       | -      | 8125.000  | 25.000 | 0.750 | 42.857 | -      | -      | 67.857  | 0.406 | -0.901 | -0.366 | 1.184 |             |
| Kembiri (Kem)          | Mangrove (MF)            | Seedling and herb | <i>Hibiscus tiliaceus</i>                | 10 | 1 | -       | -      | 6250.000  | 19.231 | 0.250 | 14.286 | -      | -      | 33.516  | 0.313 | -1.163 | -0.363 |       |             |
| Kembiri (Kem)          | Mangrove (MF)            | Seedling and herb | <i>Ardisia haseltii-Ardisia haseltii</i> | 1  | 1 | -       | -      | 625.000   | 1.923  | 0.250 | 14.286 | -      | -      | 16.209  | 0.031 | -3.466 | -0.108 |       |             |
| Kembiri (Kem)          | Mangrove (MF)            | Sapling           | <i>Ardisia lanceolata</i>                | 5  | 2 | -       | -      | 500.000   | 25.000 | 0.500 | 40.000 | -      | -      | 65.000  | 0.250 | -1.386 | -0.347 |       |             |
| Kembiri (Kem)          | Mangrove (MF)            | Sapling           | <i>Hibiscus tiliaceus</i>                | 10 | 2 | -       | -      | 1000.000  | 50.000 | 0.500 | 40.000 | -      | -      | 90.000  | 0.500 | -0.693 | -0.347 | 1.040 |             |
| Kembiri (Kem)          | Mangrove (MF)            | Sapling           | <i>Excoecaria agallocha</i>              | 5  | 1 | -       | -      | 500.000   | 25.000 | 0.250 | 20.000 | -      | -      | 45.000  | 0.250 | -1.386 | -0.347 |       |             |
| Kembiri (Kem)          | Mangrove (MF)            | Poles             | <i>Bruguiera gymnorhiza</i>              | 1  | 1 | 6.369   | 0.003  | 25.000    | 10.000 | 0.250 | 16.667 | 0.080  | 13.495 | 40.161  | 0.100 | -2.303 | -0.230 |       |             |
| Kembiri (Kem)          | Mangrove (MF)            | Poles             | <i>Excoecaria agallocha</i>              | 5  | 3 | 28.344  | 0.013  | 125.000   | 50.000 | 0.750 | 50.000 | 0.321  | 54.349 | 154.349 | 0.500 | -0.693 | -0.347 | 1.221 |             |
| Kembiri (Kem)          | Mangrove (MF)            | Poles             | <i>Xylocarpus granatum</i>               | 2  | 1 | 9.236   | 0.003  | 50.000    | 20.000 | 0.250 | 16.667 | 0.086  | 14.608 | 51.275  | 0.200 | -1.609 | -0.322 |       |             |
| Kembiri (Kem)          | Mangrove (MF)            | Poles             | <i>Bruguiera sexangula</i>               | 2  | 1 | 10.191  | 0.004  | 50.000    | 20.000 | 0.250 | 16.667 | 0.102  | 17.340 | 54.007  | 0.200 | -1.609 | -0.322 |       |             |
| Kembiri (Kem)          | Mangrove (MF)            | tree              | <i>Ficus variegata</i>                   | 1  | 1 | 7.006   | 0.038  | 6.250     | 0.500  | 0.250 | 4.762  | 0.237  | 0.075  | 5.337   | 0.005 | -5.298 | -0.026 |       |             |
| Kembiri (Kem)          | Mangrove (MF)            | tree              | <i>Bruguiera gymnorhiza</i>              | 65 | 2 | 955.096 | 11.668 | 406.250   | 32.500 | 0.500 | 9.524  | 72.925 | 23.083 | 65.106  | 0.325 | -1.124 | -0.365 |       |             |
| Kembiri (Kem)          | Mangrove (MF)            | tree              | <i>Excoecaria agallocha</i>              | 61 | 4 | 832.166 | 10.357 | 381.250   | 30.500 | 1.000 | 19.048 | 64.732 | 20.489 | 70.037  | 0.305 | -1.187 | -0.362 |       |             |
| Kembiri (Kem)          | Mangrove (MF)            | tree              | <i>Heritiera littoralis</i>              | 1  | 1 | 8.599   | 0.057  | 6.250     | 0.500  | 0.250 | 4.762  | 0.358  | 0.113  | 5.375   | 0.005 | -5.298 | -0.026 |       |             |
| Kembiri (Kem)          | Mangrove (MF)            | tree              | <i>Psychotria malayana</i>               | 2  | 1 | 15.287  | 0.091  | 12.500    | 1.000  | 0.250 | 4.762  | 0.569  | 0.180  | 5.942   | 0.010 | -4.605 | -0.046 | 1.582 | 347.133758  |
| Kembiri (Kem)          | Mangrove (MF)            | tree              | <i>Xylocarpus granatum</i>               | 13 | 3 | 357.006 | 8.845  | 81.250    | 6.500  | 0.750 | 14.286 | 55.283 | 17.499 | 38.284  | 0.065 | -2.733 | -0.178 |       |             |
| Kembiri (Kem)          | Mangrove (MF)            | tree              | <i>Lumnitzera littorea</i>               | 19 | 4 | 460.828 | 12.636 | 118.750   | 9.500  | 1.000 | 19.048 | 78.973 | 24.997 | 53.545  | 0.095 | -2.354 | -0.224 |       |             |
| Kembiri (Kem)          | Mangrove (MF)            | tree              | <i>Bruguiera sexangula</i>               | 36 | 4 | 471.338 | 6.744  | 225.000   | 18.000 | 1.000 | 19.048 | 42.148 | 13.341 | 50.388  | 0.180 | -1.715 | -0.309 |       |             |
| Kembiri (Kem)          | Mangrove (MF)            | tree              | <i>Ardisia haseltii</i>                  | 2  | 1 | 16.879  | 0.112  | 12.500    | 1.000  | 0.250 | 4.762  | 0.701  | 0.222  | 5.984   | 0.010 | -4.605 | -0.046 |       |             |
| Kampak Island (TR-Kam) | Mangrove (MF)            | Seedling and herb | <i>Lumnitzera littorea</i>               | 69 | 3 | -       | -      | 57500.000 | 68.317 | 1.000 | 27.248 | -      | -      | 95.565  | 0.683 | -0.381 | -0.260 | 1.193 |             |
| Kampak Island (TR-Kam) | Mangrove (MF)            | Seedling and herb | <i>Rhizophora mucronata</i>              | 2  | 1 | -       | -      | 1666.667  | 1.980  | 0.333 | 9.083  | -      | -      | 11.063  | 0.020 | -3.922 | -0.078 |       |             |

|                        |                   |                   |                                      |     |   |         |        |           |        |       |        |         |        |         |       |        |        |             |
|------------------------|-------------------|-------------------|--------------------------------------|-----|---|---------|--------|-----------|--------|-------|--------|---------|--------|---------|-------|--------|--------|-------------|
| Kampak Island (TR-Kam) | Manggrove (MF)    | Seedling and herb | <i>Avicennia alba</i>                | 8   | 2 | -       | -      | 6666.667  | 7.921  | 0.667 | 18.165 | -       | -      | 26.086  | 0.079 | -2.536 | -0.201 |             |
| Kampak Island (TR-Kam) | Manggrove (MF)    | Seedling and herb | <i>Hibiscus tiliaceus</i>            | 2   | 1 | -       | -      | 1666.667  | 1.980  | 0.333 | 9.083  | -       | -      | 11.063  | 0.020 | -3.922 | -0.078 |             |
| Kampak Island (TR-Kam) | Manggrove (MF)    | Seedling and herb | <i>Scaevola taccada</i>              | 8   | 1 | -       | -      | 6666.667  | 7.921  | 0.333 | 9.083  | -       | -      | 17.003  | 0.079 | -2.536 | -0.201 |             |
| Kampak Island (TR-Kam) | Manggrove (MF)    | Seedling and herb | <i>Ardisia lanceolata</i> .          | 2   | 1 | -       | -      | 1666.667  | 1.980  | 0.333 | 9.083  | -       | -      | 11.063  | 0.020 | -3.922 | -0.078 |             |
| Kampak Island (TR-Kam) | Manggrove (MF)    | Seedling and herb | <i>Bruguiera gymnorhiza</i>          | 5   | 1 | -       | -      | 4166.667  | 4.950  | 0.333 | 9.083  | -       | -      | 14.033  | 0.050 | -3.006 | -0.149 |             |
| Kampak Island (TR-Kam) | Manggrove (MF)    | Seedling and herb | <i>Melastoma malabathricum</i>       | 5   | 1 | -       | -      | 4166.667  | 4.950  | 0.333 | 9.083  | -       | -      | 14.033  | 0.050 | -3.006 | -0.149 |             |
| Kampak Island (TR-Kam) | Manggrove (MF)    | Sapling           | <i>Lumnitzera littorea</i>           | 3   | 1 | 23.376  | 0.043  | 400.000   | 23.077 | 0.333 | 10.010 | 5.719   | 41.961 | 75.048  | 0.231 | -1.466 | -0.338 |             |
| Kampak Island (TR-Kam) | Manggrove (MF)    | Sapling           | <i>Avicennia alba</i> .              | 2   | 2 | 14.427  | 0.016  | 266.667   | 15.385 | 0.667 | 20.020 | 2.178   | 15.983 | 51.387  | 0.154 | -1.872 | -0.288 |             |
| Kampak Island (TR-Kam) | Manggrove (MF)    | Sapling           | <i>Flacourtia rukam</i>              | 2   | 2 | 10.669  | 0.009  | 266.667   | 15.385 | 0.667 | 20.020 | 1.191   | 8.741  | 44.145  | 0.154 | -1.872 | -0.288 |             |
| Kampak Island (TR-Kam) | Manggrove (MF)    | Sapling           | <i>Hibiscus tiliaceus</i>            | 3   | 2 | 17.643  | 0.024  | 400.000   | 23.077 | 0.667 | 20.020 | 3.258   | 23.904 | 67.001  | 0.231 | -1.466 | -0.338 | 1.845       |
| Kampak Island (TR-Kam) | Manggrove (MF)    | Sapling           | <i>Heritiera littoralis</i>          | 1   | 1 | 5.860   | 0.003  | 133.333   | 7.692  | 0.333 | 10.010 | 0.359   | 2.637  | 20.339  | 0.077 | -2.565 | -0.197 |             |
| Kampak Island (TR-Kam) | Manggrove (MF)    | Sapling           | <i>Pandanus tectorius</i>            | 1   | 1 | 5.255   | 0.002  | 133.333   | 7.692  | 0.333 | 10.010 | 0.289   | 2.120  | 19.823  | 0.077 | -2.565 | -0.197 |             |
| Kampak Island (TR-Kam) | Manggrove (MF)    | Sapling           | <i>Ardisia lanceolata</i>            | 1   | 1 | 7.834   | 0.005  | 133.333   | 7.692  | 0.333 | 10.010 | 0.642   | 4.713  | 22.416  | 0.077 | -2.565 | -0.197 |             |
| Kampak Island (TR-Kam) | Manggrove (MF)    | Poles             | <i>Lumnitzera littorea</i>           | 2   | 1 | 25.541  | 0.051  | 66.667    | 18.182 | 0.333 | 12.484 | 1.707   | 12.141 | 42.807  | 0.182 | -1.705 | -0.310 |             |
| Kampak Island (TR-Kam) | Manggrove (MF)    | Poles             | <i>Hibiscus tiliaceus</i>            | 1   | 1 | 11.306  | 0.010  | 33.333    | 9.091  | 0.333 | 12.484 | 0.334   | 2.379  | 23.954  | 0.091 | -2.398 | -0.218 |             |
| Kampak Island (TR-Kam) | Manggrove (MF)    | Poles             | <i>Antidesma cuspidatum</i>          | 1   | 1 | 14.331  | 0.016  | 33.333    | 9.091  | 0.333 | 12.484 | 0.537   | 3.822  | 25.398  | 0.091 | -2.398 | -0.218 |             |
| Kampak Island (TR-Kam) | Manggrove (MF)    | Poles             | <i>Pandanus tectorius</i>            | 4   | 2 | 60.000  | 0.283  | 133.333   | 36.363 | 0.667 | 24.969 | 9.420   | 66.999 | 128.331 | 0.364 | -1.012 | -0.368 | 1.768       |
| Kampak Island (TR-Kam) | Manggrove (MF)    | Poles             | <i>Ardisia lanceolata</i>            | 1   | 1 | 17.611  | 0.024  | 33.333    | 9.091  | 0.333 | 12.484 | 0.812   | 5.772  | 27.348  | 0.091 | -2.398 | -0.218 |             |
| Kampak Island (TR-Kam) | Manggrove (MF)    | Poles             | <i>Pterospermum javanicum</i>        | 1   | 1 | 14.873  | 0.017  | 33.333    | 9.091  | 0.333 | 12.484 | 0.579   | 4.117  | 25.692  | 0.091 | -2.398 | -0.218 |             |
| Kampak Island (TR-Kam) | Manggrove (MF)    | Poles             | <i>Podocarpus neriifolius</i>        | 1   | 1 | 16.019  | 0.020  | 33.333    | 9.091  | 0.333 | 12.484 | 0.671   | 4.776  | 26.351  | 0.091 | -2.398 | -0.218 |             |
| Kampak Island (TR-Kam) | Manggrove (MF)    | Tree              | <i>Lumnitzera littorea</i>           | 14  | 3 | 685.096 | 36.844 | 87.500    | 73.684 | 1.000 | 42.918 | 307.037 | 97.982 | 214.585 | 0.737 | -0.305 | -0.225 |             |
| Kampak Island (TR-Kam) | Manggrove (MF)    | Tree              | <i>Rhizophora mucronata</i>          | 4   | 3 | 96.306  | 0.728  | 25.000    | 21.053 | 1.000 | 42.918 | 6.067   | 1.936  | 65.907  | 0.211 | -1.558 | -0.328 | 0.708       |
| Kampak Island (TR-Kam) | Manggrove (MF)    | Tree              | <i>Pandanus tectorius</i>            | 1   | 1 | 19.904  | 0.031  | 6.250     | 5.263  | 0.333 | 14.306 | 0.259   | 0.083  | 19.652  | 0.053 | -2.944 | -0.155 | 267.1019108 |
| Kampak Island (TR-Kam) | Heath forest (HF) | Seedling and herb | <i>Albizia procera</i>               | 1   | 1 | -       | -      | 625.000   | 0.435  | 0.250 | 5.882  | -       | -      | 6.317   | 0.004 | -5.438 | -0.024 |             |
| Kampak Island (TR-Kam) | Heath forest (HF) | Seedling and herb | <i>Baeckea frutescens</i>            | 22  | 2 | -       | -      | 13750.000 | 9.565  | 0.500 | 11.765 | -       | -      | 21.330  | 0.096 | -2.347 | -0.224 |             |
| Kampak Island (TR-Kam) | Heath forest (HF) | Seedling and herb | <i>Calophyllum lanigerum</i> .       | 2   | 1 | -       | -      | 1250.000  | 0.870  | 0.250 | 5.882  | -       | -      | 6.752   | 0.009 | -4.745 | -0.041 |             |
| Kampak Island (TR-Kam) | Heath forest (HF) | Seedling and herb | <i>Diospyros sp</i>                  | 23  | 1 | -       | -      | 14375.000 | 10.000 | 0.250 | 5.882  | -       | -      | 15.882  | 0.100 | -2.303 | -0.230 |             |
| Kampak Island (TR-Kam) | Heath forest (HF) | Seedling and herb | <i>Garcinia celebica</i>             | 5   | 1 | -       | -      | 3125.000  | 2.174  | 0.250 | 5.882  | -       | -      | 8.056   | 0.022 | -3.829 | -0.083 |             |
| Kampak Island (TR-Kam) | Heath forest (HF) | Seedling and herb | <i>Helicia robusta</i>               | 2   | 1 | -       | -      | 1250.000  | 0.870  | 0.250 | 5.882  | -       | -      | 6.752   | 0.009 | -4.745 | -0.041 |             |
| Kampak Island (TR-Kam) | Heath forest (HF) | Seedling and herb | <i>Leptospermum polygalifolium</i>   | 27  | 1 | -       | -      | 16875.000 | 11.739 | 0.250 | 5.882  | -       | -      | 17.621  | 0.117 | -2.142 | -0.251 |             |
| Kampak Island (TR-Kam) | Heath forest (HF) | Seedling and herb | <i>Melaleuca cajuputi</i>            | 103 | 2 | -       | -      | 64375.000 | 44.783 | 0.500 | 11.765 | -       | -      | 56.547  | 0.448 | -0.803 | -0.360 | 1.834       |
| Kampak Island (TR-Kam) | Heath forest (HF) | Seedling and herb | <i>Melastoma malabathricum</i>       | 1   | 1 | -       | -      | 625.000   | 0.435  | 0.250 | 5.882  | -       | -      | 6.317   | 0.004 | -5.438 | -0.024 |             |
| Kampak Island (TR-Kam) | Heath forest (HF) | Seedling and herb | <i>Nepenthes mirabilis</i>           | 1   | 1 | -       | -      | 625.000   | 0.435  | 0.250 | 5.882  | -       | -      | 6.317   | 0.004 | -5.438 | -0.024 |             |
| Kampak Island (TR-Kam) | Heath forest (HF) | Seedling and herb | <i>Rhodomyrtus tomentosa</i>         | 18  | 2 | -       | -      | 11250.000 | 7.826  | 0.500 | 11.765 | -       | -      | 19.591  | 0.078 | -2.548 | -0.199 |             |
| Kampak Island (TR-Kam) | Heath forest (HF) | Seedling and herb | <i>Syphelia malayana</i>             | 5   | 1 | -       | -      | 3125.000  | 2.174  | 0.250 | 5.882  | -       | -      | 8.056   | 0.022 | -3.829 | -0.083 |             |
| Kampak Island (TR-Kam) | Heath forest (HF) | Seedling and herb | <i>Syzygium urceolatum</i>           | 3   | 1 | -       | -      | 1875.000  | 1.304  | 0.250 | 5.882  | -       | -      | 7.187   | 0.013 | -4.339 | -0.057 |             |
| Kampak Island (TR-Kam) | Heath forest (HF) | Seedling and herb | <i>Vaccinium bracteatum</i>          | 17  | 1 | -       | -      | 10625.000 | 7.391  | 0.250 | 5.882  | -       | -      | 13.274  | 0.074 | -2.605 | -0.193 |             |
| Kampak Island (TR-Kam) | Heath forest (HF) | Sapling           | <i>Syzygium cf. calophyllifolium</i> | 1   | 1 | 6.242   | 0.003  | 100.000   | 5.000  | 0.250 | 8.333  | 0.306   | 1.787  | 15.120  | 0.050 | -2.996 | -0.150 |             |
| Kampak Island (TR-Kam) | Heath forest (HF) | Sapling           | <i>Melaleuca cajuputi</i>            | 4   | 1 | 21.815  | 0.037  | 400.000   | 20.000 | 0.250 | 8.333  | 3.736   | 21.822 | 50.155  | 0.200 | -1.609 | -0.322 |             |
| Kampak Island (TR-Kam) | Heath forest (HF) | Sapling           | <i>Calophyllum lanigerum</i>         | 1   | 1 | 5.764   | 0.003  | 100.000   | 5.000  | 0.250 | 8.333  | 0.261   | 1.524  | 14.857  | 0.050 | -2.996 | -0.150 |             |
| Kampak Island (TR-Kam) | Heath forest (HF) | Sapling           | <i>Syzygium urceolatum</i>           | 4   | 2 | 33.726  | 0.089  | 400.000   | 20.000 | 0.500 | 16.667 | 8.929   | 52.155 | 88.822  | 0.200 | -1.609 | -0.322 |             |
| Kampak Island (TR-Kam) | Heath forest (HF) | Sapling           | <i>Syzygium acuminatissima</i>       | 2   | 1 | 11.497  | 0.010  | 200.000   | 10.000 | 0.250 | 8.333  | 1.038   | 6.061  | 24.394  | 0.100 | -2.303 | -0.230 |             |
| Kampak Island (TR-Kam) | Heath forest (HF) | Sapling           | <i>Salacia grandifolia</i>           | 1   | 1 | 6.752   | 0.004  | 100.000   | 5.000  | 0.250 | 8.333  | 0.358   | 2.090  | 15.423  | 0.050 | -2.996 | -0.150 | 2.233       |
| Kampak Island (TR-Kam) | Heath forest (HF) | Sapling           | <i>Rhodamnia cinerea</i>             | 2   | 1 | 10.000  | 0.008  | 200.000   | 10.000 | 0.250 | 8.333  | 0.785   | 4.585  | 22.919  | 0.100 | -2.303 | -0.230 |             |
| Kampak Island (TR-Kam) | Heath forest (HF) | Sapling           | <i>Diospyros sp</i>                  | 1   | 1 | 5.637   | 0.002  | 100.000   | 5.000  | 0.250 | 8.333  | 0.249   | 1.457  | 14.790  | 0.050 | -2.996 | -0.150 |             |
| Kampak Island (TR-Kam) | Heath forest (HF) | Sapling           | <i>Garcinia bancana</i>              | 1   | 1 | 5.478   | 0.002  | 100.000   | 5.000  | 0.250 | 8.333  | 0.236   | 1.376  | 14.709  | 0.050 | -2.996 | -0.150 |             |
| Kampak Island (TR-Kam) | Heath forest (HF) | Sapling           | <i>Cratoxylum glaucum</i>            | 1   | 1 | 7.134   | 0.004  | 100.000   | 5.000  | 0.250 | 8.333  | 0.399   | 2.333  | 15.667  | 0.050 | -2.996 | -0.150 |             |
| Kampak Island (TR-Kam) | Heath forest (HF) | Sapling           | <i>Baeckea frutescens</i>            | 2   | 1 | 10.223  | 0.008  | 200.000   | 10.000 | 0.250 | 8.333  | 0.820   | 4.792  | 23.125  | 0.100 | -2.303 | -0.230 |             |
| Kampak Island (TR-Kam) | Heath forest (HF) | Poles             | <i>Adinandra dumosa</i> .            | 2   | 1 | 35.701  | 0.100  | 50.000    | 10.000 | 0.250 | 11.111 | 2.501   | 4.535  | 25.646  | 0.100 | -2.303 | -0.230 |             |
| Kampak Island (TR-Kam) | Heath forest (HF) | Poles             | <i>Albizia procera</i>               | 5   | 1 | 82.038  | 0.528  | 125.000   | 25.000 | 0.250 | 11.111 | 13.208  | 23.945 | 60.056  | 0.250 | -1.386 | -0.347 |             |
| Kampak Island (TR-Kam) | Heath forest (HF) | Poles             | <i>Melaleuca cajuputi</i>            | 9   | 3 | 139.554 | 1.529  | 225.000   | 45.000 | 0.750 | 33.333 | 38.220  | 69.290 | 147.623 | 0.450 | -0.799 | -0.359 | 1.535       |
| Kampak Island (TR-Kam) | Heath forest (HF) | Poles             | <i>Dillenia suffruticosa</i>         | 1   | 1 | 10.287  | 0.008  | 25.000    | 5.000  | 0.250 | 11.111 | 0.208   | 0.376  | 16.488  | 0.050 | -2.996 | -0.150 |             |
| Kampak Island (TR-Kam) | Heath forest (HF) | Poles             | <i>Garcinia bancana</i>              | 1   | 1 | 11.847  | 0.011  | 25.000    | 5.000  | 0.250 | 11.111 | 0.275   | 0.499  | 16.610  | 0.050 | -2.996 | -0.150 |             |
| Kampak Island (TR-Kam) | Heath forest (HF) | Poles             | <i>Tristaniopsis obovata</i>         | 1   | 1 | 14.299  | 0.016  | 25.000    | 5.000  | 0.250 | 11.111 | 0.401   | 0.727  | 16.839  | 0.050 | -2.996 | -0.150 |             |

|                        |                          |                   |                               |    |   |         |        |           |        |       |        |         |        |         |       |        |        |       |             |
|------------------------|--------------------------|-------------------|-------------------------------|----|---|---------|--------|-----------|--------|-------|--------|---------|--------|---------|-------|--------|--------|-------|-------------|
| Kampak Island (TR-Kam) | Heath forest (HF)        | Poles             | Baeckea frutescens            | 1  | 1 | 13.312  | 0.014  | 25.000    | 5.000  | 0.250 | 11.111 | 0.348   | 0.630  | 16.742  | 0.050 | -2.996 | -0.150 | 1.515 | 99.93630573 |
| Kampak Island (TR-Kam) | Heath forest (HF)        | Tree              | Baccaurea deflexa             | 2  | 1 | 54.968  | 0.237  | 12.500    | 6.897  | 0.250 | 7.692  | 1.482   | 1.489  | 16.078  | 0.069 | -2.674 | -0.184 |       |             |
| Kampak Island (TR-Kam) | Heath forest (HF)        | Tree              | Adinandra dumosa              | 3  | 1 | 93.217  | 0.682  | 18.750    | 10.345 | 0.250 | 7.692  | 4.263   | 4.283  | 22.320  | 0.103 | -2.269 | -0.235 |       |             |
| Kampak Island (TR-Kam) | Heath forest (HF)        | Tree              | Albizia procera               | 1  | 1 | 20.446  | 0.033  | 6.250     | 3.448  | 0.250 | 7.692  | 0.205   | 0.206  | 11.347  | 0.034 | -3.367 | -0.116 |       |             |
| Kampak Island (TR-Kam) | Heath forest (HF)        | Tree              | Syzygium cf. calophyllifolium | 2  | 2 | 77.293  | 0.469  | 12.500    | 6.897  | 0.500 | 15.385 | 2.931   | 2.945  | 25.226  | 0.069 | -2.674 | -0.184 |       |             |
| Kampak Island (TR-Kam) | Heath forest (HF)        | Tree              | Melaleuca cajuputi            | 16 | 3 | 420.573 | 13.885 | 100.000   | 55.172 | 0.750 | 23.077 | 86.783  | 87.184 | 165.433 | 0.552 | -0.595 | -0.328 |       |             |
| Kampak Island (TR-Kam) | Heath forest (HF)        | Tree              | Syzygium urceolatum           | 3  | 2 | 80.892  | 0.514  | 18.750    | 10.345 | 0.750 | 23.077 | 3.210   | 3.225  | 36.647  | 0.103 | -2.269 | -0.235 |       |             |
| Kampak Island (TR-Kam) | Heath forest (HF)        | Tree              | Shorea balanerans             | 1  | 1 | 24.236  | 0.046  | 6.250     | 3.448  | 0.250 | 7.692  | 0.288   | 0.290  | 11.430  | 0.034 | -3.367 | -0.116 |       |             |
| Kampak Island (TR-Kam) | Heath forest (HF)        | Tree              | Baeckea frutescens            | 1  | 1 | 27.866  | 0.061  | 6.250     | 3.448  | 0.250 | 7.692  | 0.381   | 0.383  | 11.523  | 0.034 | -3.367 | -0.116 |       |             |
| Tanjung Rusa (TR-Bel)  | Swamp heath forest (SHF) | Seedling and herb | Melaleuca cajuputi            | 88 | 4 | -       | -      | 44000.000 | 66.165 | 0.800 | 0.235  | -       | -      | 66.401  | 0.662 | -0.413 | -0.273 | 1.293 |             |
| Tanjung Rusa (TR-Bel)  | Swamp heath forest (SHF) | Seedling and herb | Eugenia cerina                | 2  | 1 | -       | -      | 1000.000  | 1.504  | 0.200 | 0.059  | -       | -      | 1.563   | 0.015 | -4.197 | -0.063 |       |             |
| Tanjung Rusa (TR-Bel)  | Swamp heath forest (SHF) | Seedling and herb | Rhodamnia cinerea             | 1  | 1 | -       | -      | 500.000   | 0.752  | 0.200 | 0.059  | -       | -      | 0.811   | 0.008 | -4.890 | -0.037 |       |             |
| Tanjung Rusa (TR-Bel)  | Swamp heath forest (SHF) | Seedling and herb | Arthrophyllum javanicum       | 5  | 2 | -       | -      | 2500.000  | 3.759  | 0.400 | 0.118  | -       | -      | 3.877   | 0.038 | -3.281 | -0.123 |       |             |
| Tanjung Rusa (TR-Bel)  | Swamp heath forest (SHF) | Seedling and herb | Melastoma malabathricum       | 3  | 1 | -       | -      | 1500.000  | 2.256  | 0.200 | 0.059  | -       | -      | 2.314   | 0.023 | -3.792 | -0.086 |       |             |
| Tanjung Rusa (TR-Bel)  | Swamp heath forest (SHF) | Seedling and herb | Vitex pinnata                 | 1  | 1 | -       | -      | 500.000   | 0.752  | 0.200 | 0.059  | -       | -      | 0.811   | 0.008 | -4.890 | -0.037 |       |             |
| Tanjung Rusa (TR-Bel)  | Swamp heath forest (SHF) | Seedling and herb | Lindera cf. lucida            | 1  | 1 | -       | -      | 500.000   | 0.752  | 0.200 | 0.059  | -       | -      | 0.811   | 0.008 | -4.890 | -0.037 |       |             |
| Tanjung Rusa (TR-Bel)  | Swamp heath forest (SHF) | Seedling and herb | Lindera lucida                | 2  | 1 | -       | -      | 1000.000  | 1.504  | 0.200 | 0.059  | -       | -      | 1.563   | 0.015 | -4.197 | -0.063 |       |             |
| Tanjung Rusa (TR-Bel)  | Swamp heath forest (SHF) | Seedling and herb | Ilex cymosa                   | 14 | 1 | -       | -      | 7000.000  | 10.526 | 0.200 | 0.059  | -       | -      | 10.585  | 0.105 | -2.251 | -0.237 |       |             |
| Tanjung Rusa (TR-Bel)  | Swamp heath forest (SHF) | Seedling and herb | Antidesma cuspidatum          | 13 | 1 | -       | -      | 6500.000  | 9.774  | 0.200 | 0.059  | -       | -      | 9.833   | 0.098 | -2.325 | -0.227 |       |             |
| Tanjung Rusa (TR-Bel)  | Swamp heath forest (SHF) | Seedling and herb | Aporosa frutescens            | 1  | 1 | -       | -      | 500.000   | 0.752  | 0.200 | 0.059  | -       | -      | 0.811   | 0.008 | -4.890 | -0.037 |       |             |
| Tanjung Rusa (TR-Bel)  | Swamp heath forest (SHF) | Seedling and herb | Eurya acuminata               | 1  | 1 | -       | -      | 500.000   | 0.752  | 0.200 | 0.059  | -       | -      | 0.811   | 0.008 | -4.890 | -0.037 |       |             |
| Tanjung Rusa (TR-Bel)  | Swamp heath forest (SHF) | Seedling and herb | Syzygium acuminatissima       | 1  | 1 | -       | -      | 500.000   | 0.752  | 0.200 | 0.059  | -       | -      | 0.811   | 0.008 | -4.890 | -0.037 |       |             |
| Tanjung Rusa (TR-Bel)  | Swamp heath forest (SHF) | Sapling           | Aporosa frutescens            | 1  | 1 | 8.631   | 0.006  | 83.333    | 4.545  | 0.200 | 7.692  | 0.487   | 1.661  | 13.899  | 0.045 | -3.091 | -0.141 |       |             |
| Tanjung Rusa (TR-Bel)  | Swamp heath forest (SHF) | Sapling           | Tristaniaopsis obovata        | 5  | 2 | 31.911  | 0.080  | 416.667   | 22.727 | 0.400 | 15.385 | 6.661   | 22.704 | 60.816  | 0.227 | -1.482 | -0.337 |       |             |
| Tanjung Rusa (TR-Bel)  | Swamp heath forest (SHF) | Sapling           | Baccaurea deflexa             | 1  | 1 | 5.446   | 0.002  | 83.333    | 4.545  | 0.200 | 7.692  | 0.194   | 0.661  | 12.899  | 0.045 | -3.091 | -0.141 |       |             |
| Tanjung Rusa (TR-Bel)  | Swamp heath forest (SHF) | Sapling           | Melaleuca cajuputi            | 9  | 3 | 55.287  | 0.240  | 750.000   | 40.909 | 0.600 | 23.077 | 19.995  | 68.150 | 132.136 | 0.409 | -0.894 | -0.366 | 1.763 |             |
| Tanjung Rusa (TR-Bel)  | Swamp heath forest (SHF) | Sapling           | Arthrophyllum javanicum       | 2  | 2 | 11.688  | 0.011  | 166.667   | 9.091  | 0.400 | 15.385 | 0.894   | 3.046  | 27.521  | 0.091 | -2.398 | -0.218 |       |             |
| Tanjung Rusa (TR-Bel)  | Swamp heath forest (SHF) | Sapling           | Syzygium racemosum            | 1  | 1 | 5.255   | 0.002  | 83.333    | 4.545  | 0.200 | 7.692  | 0.181   | 0.616  | 12.853  | 0.045 | -3.091 | -0.141 |       |             |
| Tanjung Rusa (TR-Bel)  | Swamp heath forest (SHF) | Sapling           | Lindera cf. lucida            | 1  | 1 | 7.707   | 0.005  | 83.333    | 4.545  | 0.200 | 7.692  | 0.389   | 1.324  | 13.562  | 0.045 | -3.091 | -0.141 |       |             |
| Tanjung Rusa (TR-Bel)  | Swamp heath forest (SHF) | Sapling           | Lindera lucida                | 1  | 1 | 6.783   | 0.004  | 83.333    | 4.545  | 0.200 | 7.692  | 0.301   | 1.026  | 13.264  | 0.045 | -3.091 | -0.141 |       |             |
| Tanjung Rusa (TR-Bel)  | Swamp heath forest (SHF) | Sapling           | Commersonia bartramia         | 1  | 1 | 6.083   | 0.003  | 83.333    | 4.545  | 0.200 | 7.692  | 0.242   | 0.825  | 13.063  | 0.045 | -3.091 | -0.141 |       |             |
| Tanjung Rusa (TR-Bel)  | Swamp heath forest (SHF) | Poles             | Calophyllum lanigerum         | 2  | 2 | 23.344  | 0.043  | 40.000    | 11.765 | 0.400 | 13.333 | 0.856   | 6.385  | 31.483  | 0.118 | -2.140 | -0.252 |       |             |
| Tanjung Rusa (TR-Bel)  | Swamp heath forest (SHF) | Poles             | Vernonia arborea              | 1  | 1 | 12.006  | 0.011  | 20.000    | 5.882  | 0.200 | 6.667  | 0.226   | 1.689  | 14.238  | 0.059 | -2.833 | -0.167 |       |             |
| Tanjung Rusa (TR-Bel)  | Swamp heath forest (SHF) | Poles             | Melaleuca cajuputi            | 4  | 3 | 61.369  | 0.296  | 80.000    | 23.529 | 0.600 | 20.000 | 5.913   | 44.126 | 87.656  | 0.235 | -1.447 | -0.340 |       |             |
| Tanjung Rusa (TR-Bel)  | Swamp heath forest (SHF) | Poles             | Ficus sundaica                | 1  | 1 | 15.637  | 0.019  | 20.000    | 5.882  | 0.200 | 6.667  | 0.384   | 2.865  | 15.414  | 0.059 | -2.833 | -0.167 |       |             |
| Tanjung Rusa (TR-Bel)  | Swamp heath forest (SHF) | Poles             | Cratogeomys formosus          | 2  | 1 | 23.662  | 0.044  | 40.000    | 11.765 | 0.200 | 6.667  | 0.879   | 6.560  | 24.992  | 0.118 | -2.140 | -0.252 |       |             |
| Tanjung Rusa (TR-Bel)  | Swamp heath forest (SHF) | Poles             | Antidesma cuspidatum          | 1  | 1 | 19.331  | 0.029  | 20.000    | 5.882  | 0.200 | 6.667  | 0.587   | 4.378  | 16.927  | 0.059 | -2.833 | -0.167 | 2.344 |             |
| Tanjung Rusa (TR-Bel)  | Swamp heath forest (SHF) | Poles             | Adinandra dumosa              | 1  | 1 | 15.828  | 0.020  | 20.000    | 5.882  | 0.200 | 6.667  | 0.393   | 2.935  | 15.484  | 0.059 | -2.833 | -0.167 |       |             |
| Tanjung Rusa (TR-Bel)  | Swamp heath forest (SHF) | Poles             | Eurya glabra                  | 1  | 1 | 16.592  | 0.022  | 20.000    | 5.882  | 0.200 | 6.667  | 0.432   | 3.226  | 15.775  | 0.059 | -2.833 | -0.167 |       |             |
| Tanjung Rusa (TR-Bel)  | Swamp heath forest (SHF) | Poles             | Schima walichii               | 1  | 1 | 19.204  | 0.029  | 20.000    | 5.882  | 0.200 | 6.667  | 0.579   | 4.321  | 16.870  | 0.059 | -2.833 | -0.167 |       |             |
| Tanjung Rusa (TR-Bel)  | Swamp heath forest (SHF) | Poles             | Rhodamnia cinerea             | 1  | 1 | 12.621  | 0.012  | 20.000    | 5.882  | 0.200 | 6.667  | 0.236   | 1.761  | 14.310  | 0.059 | -2.833 | -0.167 |       |             |
| Tanjung Rusa (TR-Bel)  | Swamp heath forest (SHF) | Poles             | Vitex pinnata                 | 1  | 1 | 38.503  | 0.116  | 20.000    | 5.882  | 0.200 | 6.667  | 2.328   | 17.370 | 29.919  | 0.059 | -2.833 | -0.167 |       |             |
| Tanjung Rusa (TR-Bel)  | Swamp heath forest (SHF) | Poles             | Salacia grandifolia           | 1  | 1 | 19.268  | 0.029  | 20.000    | 5.882  | 0.200 | 6.667  | 0.583   | 4.350  | 16.899  | 0.059 | -2.833 | -0.167 |       |             |
| Tanjung Rusa (TR-Bel)  | Swamp heath forest (SHF) | Tree              | Vitex pinnata                 | 2  | 1 | 47.134  | 0.174  | 10.000    | 7.692  | 0.200 | 10.000 | 0.872   | 0.756  | 18.449  | 0.077 | -2.565 | -0.197 |       |             |
| Tanjung Rusa (TR-Bel)  | Swamp heath forest (SHF) | Tree              | Schima walichii               | 1  | 1 | 39.236  | 0.121  | 5.000     | 3.846  | 0.200 | 10.000 | 0.604   | 0.524  | 14.370  | 0.038 | -3.258 | -0.125 | 1.738 | 106.4048125 |
| Tanjung Rusa (TR-Bel)  | Swamp heath forest (SHF) | Tree              | Salacia grandifolia           | 2  | 1 | 85.796  | 0.578  | 10.000    | 7.692  | 0.200 | 10.000 | 2.889   | 2.506  | 20.199  | 0.077 | -2.565 | -0.197 |       |             |
| Tanjung Rusa (TR-Bel)  | Swamp heath forest (SHF) | Tree              | Baeckea frutescens            | 1  | 1 | 25.860  | 0.052  | 5.000     | 3.846  | 0.200 | 10.000 | 0.262   | 0.228  | 14.074  | 0.038 | -3.258 | -0.125 |       |             |
| Tanjung Rusa (TR-Bel)  | Swamp heath forest (SHF) | Tree              | Microcos tomentosa            | 1  | 1 | 22.611  | 0.040  | 5.000     | 3.846  | 0.200 | 10.000 | 0.201   | 0.174  | 14.020  | 0.038 | -3.258 | -0.125 |       |             |
| Tanjung Rusa (TR-Bel)  | Swamp heath forest (SHF) | Tree              | Antidesma cuspidatum          | 12 | 1 | 509.745 | 20.397 | 60.000    | 46.154 | 0.200 | 10.000 | 101.987 | 88.469 | 144.623 | 0.462 | -0.773 | -0.357 |       |             |
| Tanjung Rusa (TR-Bel)  | Swamp heath forest (SHF) | Tree              | Melaleuca cajuputi            | 4  | 2 | 122.134 | 1.171  | 20.000    | 15.385 | 0.400 | 20.000 | 5.855   | 5.079  | 40.463  | 0.154 | -1.872 | -0.288 |       |             |
| Tanjung Rusa (TR-Bel)  | Swamp heath forest (SHF) | Tree              | Lepisanthes amoena            | 2  | 1 | 76.146  | 0.455  | 10.000    | 7.692  | 0.200 | 10.000 | 2.276   | 1.974  | 19.666  | 0.077 | -2.565 | -0.197 |       |             |
| Tanjung Rusa (TR-Bel)  | Swamp heath forest (SHF) | Tree              | Neouvaria acuminatissima      | 1  | 1 | 28.981  | 0.066  | 5.000     | 3.846  | 0.200 | 10.000 | 0.330   | 0.286  | 14.132  | 0.038 | -3.258 | -0.125 |       |             |
| Tanjung Rusa (TR-Bel)  | Heath forest (HF)        | Seedling and herb | Gliricidia sepium             | 2  | 2 | -       | -      | 1666.667  | 1.695  | 0.667 | 14.306 | -       | -      | 16.001  | 0.017 | -4.078 | -0.069 | 2.125 |             |
| Tanjung Rusa (TR-Bel)  | Heath forest (HF)        | Seedling and herb | Syzygium foxoarthianum        | 2  | 1 | -       | -      | 1666.667  | 1.695  | 0.333 | 7.153  | -       | -      | 8.848   | 0.017 | -4.078 | -0.069 |       |             |

|                       |                   |                   |                                |    |   |         |       |           |        |       |        |       |        |        |       |        |        |             |
|-----------------------|-------------------|-------------------|--------------------------------|----|---|---------|-------|-----------|--------|-------|--------|-------|--------|--------|-------|--------|--------|-------------|
| Tanjung Rusa (TR-Bel) | Heath forest (HF) | Seedling and herb | <i>Calophyllum lanigerum</i>   | 7  | 2 | -       | -     | 5833.333  | 5.932  | 0.667 | 14.306 | -     | -      | 20.238 | 0.059 | -2.825 | -0.168 |             |
| Tanjung Rusa (TR-Bel) | Heath forest (HF) | Seedling and herb | <i>Syzygium syzygioides</i>    | 1  | 1 | -       | -     | 833.333   | 0.847  | 0.333 | 7.153  | -     | -      | 8.001  | 0.008 | -4.771 | -0.040 |             |
| Tanjung Rusa (TR-Bel) | Heath forest (HF) | Seedling and herb | <i>Rhodammia cinerea</i>       | 1  | 1 | -       | -     | 833.333   | 0.847  | 0.333 | 7.153  | -     | -      | 8.001  | 0.008 | -4.771 | -0.040 |             |
| Tanjung Rusa (TR-Bel) | Heath forest (HF) | Seedling and herb | <i>Arthrophyllum javanicum</i> | 1  | 1 | -       | -     | 833.333   | 0.847  | 0.333 | 7.153  | -     | -      | 8.001  | 0.008 | -4.771 | -0.040 |             |
| Tanjung Rusa (TR-Bel) | Heath forest (HF) | Seedling and herb | <i>Rhodomyrtus tomentosa</i>   | 1  | 1 | -       | -     | 833.333   | 0.847  | 0.333 | 7.153  | -     | -      | 8.001  | 0.008 | -4.771 | -0.040 |             |
| Tanjung Rusa (TR-Bel) | Heath forest (HF) | Seedling and herb | <i>Hevea brasiliensis</i>      | 8  | 1 | -       | -     | 6666.667  | 6.780  | 0.333 | 7.153  | -     | -      | 13.933 | 0.068 | -2.691 | -0.182 |             |
| Tanjung Rusa (TR-Bel) | Heath forest (HF) | Seedling and herb | <i>Garcinia celebica</i>       | 1  | 1 | -       | -     | 833.333   | 0.847  | 0.333 | 7.153  | -     | -      | 8.001  | 0.008 | -4.771 | -0.040 |             |
| Tanjung Rusa (TR-Bel) | Heath forest (HF) | Seedling and herb | <i>Melastoma malabathricum</i> | 9  | 1 | -       | -     | 7500.000  | 7.627  | 0.333 | 7.153  | -     | -      | 14.780 | 0.076 | -2.573 | -0.196 |             |
| Tanjung Rusa (TR-Bel) | Heath forest (HF) | Seedling and herb | <i>Vitex pinnata</i>           | 6  | 2 | -       | -     | 5000.000  | 5.085  | 0.667 | 14.306 | -     | -      | 19.391 | 0.051 | -2.979 | -0.151 |             |
| Tanjung Rusa (TR-Bel) | Heath forest (HF) | Seedling and herb | <i>Lindera lucida</i>          | 2  | 2 | -       | -     | 1666.667  | 1.695  | 0.667 | 14.306 | -     | -      | 16.001 | 0.017 | -4.078 | -0.069 |             |
| Tanjung Rusa (TR-Bel) | Heath forest (HF) | Seedling and herb | <i>Salacia grandifolia</i>     | 12 | 1 | -       | -     | 10000.000 | 10.169 | 0.333 | 7.153  | -     | -      | 17.323 | 0.102 | -2.286 | -0.232 |             |
| Tanjung Rusa (TR-Bel) | Heath forest (HF) | Seedling and herb | <i>Syzygium bankense</i>       | 50 | 1 | -       | -     | 41666.667 | 42.373 | 0.333 | 7.153  | -     | -      | 49.526 | 0.424 | -0.859 | -0.364 |             |
| Tanjung Rusa (TR-Bel) | Heath forest (HF) | Seedling and herb | <i>Syzygium urceolatum</i>     | 4  | 1 | -       | -     | 3333.333  | 3.390  | 0.333 | 7.153  | -     | -      | 10.543 | 0.034 | -3.384 | -0.115 |             |
| Tanjung Rusa (TR-Bel) | Heath forest (HF) | Seedling and herb | <i>Schima walichii</i>         | 4  | 1 | -       | -     | 3333.333  | 3.390  | 0.333 | 7.153  | -     | -      | 10.543 | 0.034 | -3.384 | -0.115 |             |
| Tanjung Rusa (TR-Bel) | Heath forest (HF) | Seedling and herb | <i>Decaspermum parviflorum</i> | 6  | 1 | -       | -     | 5000.000  | 5.085  | 0.333 | 7.153  | -     | -      | 12.238 | 0.051 | -2.979 | -0.151 |             |
| Tanjung Rusa (TR-Bel) | Heath forest (HF) | Seedling and herb | <i>Psychotria malayana</i>     | 1  | 1 | -       | -     | 833.333   | 0.847  | 0.333 | 7.153  | -     | -      | 8.001  | 0.008 | -4.771 | -0.040 |             |
| Tanjung Rusa (TR-Bel) | Heath forest (HF) | Sapling           | <i>Acacia mangium</i>          | 2  | 1 | 16.274  | 0.021 | 266.667   | 16.667 | 0.333 | 11.111 | 2.772 | 23.216 | 50.994 | 0.167 | -1.792 | -0.299 |             |
| Tanjung Rusa (TR-Bel) | Heath forest (HF) | Sapling           | <i>Syzygium zeylanicum</i>     | 1  | 1 | 6.529   | 0.003 | 133.333   | 8.333  | 0.333 | 11.111 | 0.446 | 3.736  | 23.181 | 0.083 | -2.485 | -0.207 |             |
| Tanjung Rusa (TR-Bel) | Heath forest (HF) | Sapling           | <i>Arthrophyllum javanicum</i> | 1  | 1 | 5.892   | 0.003 | 133.333   | 8.333  | 0.333 | 11.111 | 0.363 | 3.043  | 22.487 | 0.083 | -2.485 | -0.207 |             |
| Tanjung Rusa (TR-Bel) | Heath forest (HF) | Sapling           | <i>Hevea brasiliensis</i>      | 1  | 1 | 6.688   | 0.004 | 133.333   | 8.333  | 0.333 | 11.111 | 0.468 | 3.921  | 23.365 | 0.083 | -2.485 | -0.207 |             |
| Tanjung Rusa (TR-Bel) | Heath forest (HF) | Sapling           | <i>Aleurites moluccana</i>     | 1  | 1 | 5.446   | 0.002 | 133.333   | 8.333  | 0.333 | 11.111 | 0.310 | 2.600  | 22.044 | 0.083 | -2.485 | -0.207 | 2.023       |
| Tanjung Rusa (TR-Bel) | Heath forest (HF) | Sapling           | <i>Commersonia bartramia</i>   | 2  | 1 | 16.911  | 0.022 | 266.667   | 16.667 | 0.333 | 11.111 | 2.993 | 25.069 | 52.847 | 0.167 | -1.792 | -0.299 |             |
| Tanjung Rusa (TR-Bel) | Heath forest (HF) | Sapling           | <i>Tristaniaopsis obovata</i>  | 2  | 1 | 15.096  | 0.018 | 266.667   | 16.667 | 0.333 | 11.111 | 2.385 | 19.976 | 47.753 | 0.167 | -1.792 | -0.299 |             |
| Tanjung Rusa (TR-Bel) | Heath forest (HF) | Sapling           | <i>Schima walichii</i>         | 2  | 2 | 14.522  | 0.017 | 266.667   | 16.667 | 0.667 | 22.222 | 2.207 | 18.487 | 57.376 | 0.167 | -1.792 | -0.299 |             |
| Tanjung Rusa (TR-Bel) | Heath forest (HF) | Poles             | <i>Guioa diplopetala</i>       | 1  | 1 | 18.217  | 0.026 | 33.333    | 5.883  | 0.333 | 8.333  | 0.868 | 4.483  | 18.699 | 0.059 | -2.833 | -0.167 |             |
| Tanjung Rusa (TR-Bel) | Heath forest (HF) | Poles             | <i>Syzygium urceolatum</i>     | 1  | 1 | 13.917  | 0.015 | 33.333    | 5.883  | 0.333 | 8.333  | 0.507 | 2.617  | 16.833 | 0.059 | -2.833 | -0.167 |             |
| Tanjung Rusa (TR-Bel) | Heath forest (HF) | Poles             | <i>Baeckea frutescens</i>      | 1  | 1 | 16.369  | 0.021 | 33.333    | 5.883  | 0.333 | 8.333  | 0.701 | 3.620  | 17.836 | 0.059 | -2.833 | -0.167 |             |
| Tanjung Rusa (TR-Bel) | Heath forest (HF) | Poles             | <i>Albicia sp.</i>             | 1  | 1 | 13.312  | 0.014 | 33.333    | 5.883  | 0.333 | 8.333  | 0.464 | 2.394  | 16.610 | 0.059 | -2.833 | -0.167 |             |
| Tanjung Rusa (TR-Bel) | Heath forest (HF) | Poles             | <i>Lindera lucida</i>          | 2  | 1 | 22.293  | 0.039 | 66.667    | 11.766 | 0.333 | 8.333  | 1.300 | 6.714  | 26.813 | 0.118 | -2.140 | -0.252 |             |
| Tanjung Rusa (TR-Bel) | Heath forest (HF) | Poles             | <i>Commersonia bartramia</i>   | 1  | 1 | 10.796  | 0.009 | 33.333    | 5.883  | 0.333 | 8.333  | 0.305 | 1.575  | 15.791 | 0.059 | -2.833 | -0.167 | 2.262       |
| Tanjung Rusa (TR-Bel) | Heath forest (HF) | Poles             | <i>Salacia grandifolia</i>     | 2  | 1 | 35.191  | 0.097 | 66.667    | 11.766 | 0.333 | 8.333  | 3.241 | 16.730 | 36.829 | 0.118 | -2.140 | -0.252 |             |
| Tanjung Rusa (TR-Bel) | Heath forest (HF) | Poles             | <i>Vitex pinnata</i>           | 2  | 1 | 38.503  | 0.116 | 66.667    | 11.766 | 0.333 | 8.333  | 3.879 | 20.027 | 40.126 | 0.118 | -2.140 | -0.252 |             |
| Tanjung Rusa (TR-Bel) | Heath forest (HF) | Poles             | <i>Hevea brasiliensis</i>      | 4  | 2 | 53.057  | 0.221 | 133.333   | 23.532 | 0.667 | 16.667 | 7.366 | 38.029 | 78.227 | 0.235 | -1.447 | -0.340 |             |
| Tanjung Rusa (TR-Bel) | Heath forest (HF) | Poles             | <i>Calophyllum lanigerum</i>   | 1  | 1 | 11.497  | 0.010 | 33.333    | 5.883  | 0.333 | 8.333  | 0.346 | 1.786  | 16.002 | 0.059 | -2.833 | -0.167 |             |
| Tanjung Rusa (TR-Bel) | Heath forest (HF) | Poles             | <i>Rhodammia cinerea</i>       | 1  | 1 | 12.261  | 0.012 | 33.333    | 5.883  | 0.333 | 8.333  | 0.393 | 2.031  | 16.247 | 0.059 | -2.833 | -0.167 |             |
| Tanjung Rusa (TR-Bel) | Heath forest (HF) | Tree              | <i>Lepisanthes amoena</i>      | 2  | 1 | 76.146  | 0.455 | 16.667    | 10.529 | 0.333 | 11.111 | 3.793 | 12.720 | 34.359 | 0.105 | -2.251 | -0.237 |             |
| Tanjung Rusa (TR-Bel) | Heath forest (HF) | Tree              | <i>Salacia grandifolia</i>     | 2  | 1 | 85.796  | 0.578 | 16.667    | 10.529 | 0.333 | 11.111 | 4.815 | 16.148 | 37.788 | 0.105 | -2.251 | -0.237 |             |
| Tanjung Rusa (TR-Bel) | Heath forest (HF) | Tree              | <i>Vitex pinnata</i>           | 2  | 1 | 47.134  | 0.174 | 16.667    | 10.529 | 0.333 | 11.111 | 1.453 | 4.874  | 26.513 | 0.105 | -2.251 | -0.237 |             |
| Tanjung Rusa (TR-Bel) | Heath forest (HF) | Tree              | <i>Baeckea frutescens</i>      | 1  | 1 | 25.860  | 0.052 | 8.333     | 5.264  | 0.333 | 11.111 | 0.437 | 1.467  | 17.842 | 0.053 | -2.944 | -0.155 |             |
| Tanjung Rusa (TR-Bel) | Heath forest (HF) | Tree              | <i>Rhodammia cinerea</i>       | 1  | 1 | 24.076  | 0.046 | 8.333     | 5.264  | 0.333 | 11.111 | 0.379 | 1.272  | 17.647 | 0.053 | -2.944 | -0.155 | 2.087       |
| Tanjung Rusa (TR-Bel) | Heath forest (HF) | Tree              | <i>Elais guineensis</i>        | 1  | 1 | 22.006  | 0.038 | 8.333     | 5.264  | 0.333 | 11.111 | 0.317 | 1.062  | 17.438 | 0.053 | -2.944 | -0.155 | 63.13517339 |
| Tanjung Rusa (TR-Bel) | Heath forest (HF) | Tree              | <i>Hevea brasiliensis</i>      | 3  | 1 | 81.051  | 0.516 | 25.000    | 15.793 | 0.333 | 11.111 | 4.297 | 14.411 | 41.315 | 0.158 | -1.846 | -0.291 |             |
| Tanjung Rusa (TR-Bel) | Heath forest (HF) | Tree              | <i>Acacia mangium</i>          | 4  | 1 | 121.306 | 1.155 | 33.333    | 21.057 | 0.333 | 11.111 | 9.626 | 32.281 | 64.449 | 0.211 | -1.558 | -0.328 |             |
| Tanjung Rusa (TR-Bel) | Heath forest (HF) | Tree              | <i>Schima walichii</i>         | 3  | 1 | 84.841  | 0.565 | 25.000    | 15.793 | 0.333 | 11.111 | 4.709 | 15.790 | 42.694 | 0.158 | -1.846 | -0.291 |             |



## References

1. Basrowi, M.; Qayim, I.; Raffiudin, R. Modeling of potential bee forage habitat for *Apis dorsata* in Membalong, Belitung. *J. Ilmu Pertan. Indones.* **2022**, *27*, 562–573Bruchac, M.M. Indigenous Knowledge and Traditional Knowledge. In *Encyclopedia of Global Archaeology*; Smith, C., Ed.; Springer Science and Business Media: New York, NY, USA, 2014; pp. 3814–3824.
2. Bramasta, D.; Qayim, I.; Djuita, N.R.; Raffiudin, R.; Putra, R.E.; Soesilohadi, R.H.; Purnobasuki, H. Melissopalynology and vegetation analysis surrounding *sunggau* of giant honey bee *Apis dorsata* in Belitung Regency. *HAYATI J. Biosci.* **2023**, *30*, 1167–1174.
