# Supplementary material for: Traditional Knowledge of Plants for Sunggau Rafters on Three Forest Types for Conservation of Apis dorsata in Indonesia
Source: MDPI journal article supplement (doi:10.3390/f15040657), 2024-04-04
Supplement: s1 [file s1]

*Supplementary File*

# **Traditional Knowledge of Plants for *Sunggau* Rafters on Three Forest Types for Conservation of *Apis dorsata* in Indonesia**

Suci Dian Hayati<sup>1</sup>, Ibnul Qayim<sup>2</sup>, Rika Raffiudin<sup>2</sup>, Nunik Sri Ariyanti<sup>2\*</sup>, Windra  
Priawandiputra<sup>2</sup>, Miftahudin Miftahudin<sup>2</sup>

Informed consent of bee farmer respondents

## Informed Consent

### *Kesediaan mengisi Kuesioner*

Jika saudara/i menyatakan BERSEDIA dengan sukarela untuk ikut serta dalam penelitian ini, maka Anda mendapatkan jaminan dari peneliti utama yaitu Suci Dian Hayati, bahwa identitas dan data yang Anda berikan hanya akan digunakan untuk keperluan penelitian dan tidak akan diberikan ke pihak siapapun, kapanpun, dan untuk kepentingan apapun.

Anda juga mendapat jaminan bahwa Anda bisa menarik diri dari penelitian ini kapan saja dan dengan demikian data Anda tidak akan dipakai. Jika saudara/i TIDAK BERSEDIA mengikuti penelitian ini, maka pengisian kuesioner tidak akan dilanjutkan.

Apakah Anda bersedia ikut serta dalam penelitian ini?

Ya/Tidak

Tanda tangan

  
.....  
Refli

| A. Identitas Responden |                                    |   |                                          |
|------------------------|------------------------------------|---|------------------------------------------|
| 1.                     | Nama                               | : | Refli                                    |
| 2.                     | Jenis Kelamin                      | : | Pria / Perempuan                         |
| 3.                     | Usia                               | : | 47                                       |
| 4.                     | Alamat                             | : | Perpat                                   |
| 5.                     | Pekerjaan                          | : | Petani lada, petani sawah, pekebun karet |
| 6.                     | No Telepon                         | : | -                                        |
| 7.                     | Pendidikan terakhir                | : | SMP                                      |
| 8.                     | Asal daerah                        | : | Penduduk asli                            |
| 9.                     | Suku                               | : | Melayu Belitung                          |
| 10.                    | Status dalam sistem kelola sunggau | : | Petani lebah/pemilik sunggau             |



## Informed Consent

### Kesediaan mengisi Kuesioner

Jika saudara/i menyatakan BERSEDIA dengan sukarela untuk ikut serta dalam penelitian ini, maka Anda mendapatkan jaminan dari peneliti utama yaitu Suci Dian Hayati, bahwa identitas dan data yang Anda berikan hanya akan digunakan untuk keperluan penelitian dan tidak akan diberikan ke pihak siapapun, kapanpun, dan untuk kepentingan apapun.

Anda juga mendapat jaminan bahwa Anda bisa menarik diri dari penelitian ini kapan saja dan dengan demikian data Anda tidak akan dipakai. Jika saudara/i TIDAK BERSEDIA mengikuti penelitian ini, maka pengisian kuesioner tidak akan dilanjutkan.

Apakah Anda bersedia ikut serta dalam penelitian ini?

Ya/Tidak

Tanda tangan

  
.....  
DIARDI

| A. Identitas Responden |                                    |   |                                                    |
|------------------------|------------------------------------|---|----------------------------------------------------|
| 1.                     | Nama                               | : | Diardi                                             |
| 2.                     | Jenis Kelamin                      | : | Pria / Perempuan                                   |
| 3.                     | Usia                               | : | 47                                                 |
| 4.                     | Alamat                             | : | Perpat                                             |
| 5.                     | Pekerjaan                          | : | Petani lada, petani sawah, pekebun karet dan sawit |
| 6.                     | No Telepon                         | : | 0819-2975-1693                                     |
| 7.                     | Pendidikan terakhir                | : | SMP                                                |
| 8.                     | Asal daerah                        | : | Penduduk asli                                      |
| 9.                     | Suku                               | : | Melayu Belitung                                    |
| 10.                    | Status dalam sistem kelola sunggau | : | Petani lebah/pemilik sunggau                       |



## Informed Consent

### *Kesediaan mengisi Kuesioner*

Jika saudara/i menyatakan BERSEDIA dengan sukarela untuk ikut serta dalam penelitian ini, maka Anda mendapatkan jaminan dari peneliti utama yaitu Suci Dian Hayati, bahwa identitas dan data yang Anda berikan hanya akan digunakan untuk keperluan penelitian dan tidak akan diberikan ke pihak siapapun, kapanpun, dan untuk kepentingan apapun.

Anda juga mendapat jaminan bahwa Anda bisa menarik diri dari penelitian ini kapan saja dan dengan demikian data Anda tidak akan dipakai. Jika saudara/i TIDAK BERSEDIA mengikuti penelitian ini, maka pengisian kuesioner tidak akan dilanjutkan.

Apakah Anda bersedia ikut serta dalam penelitian ini?

Ya/Tidak-

*Habli*

Tanda tangan

.....  
HABLI

| A. Identitas Responden |                                    |   |                                                           |
|------------------------|------------------------------------|---|-----------------------------------------------------------|
| 1.                     | Nama                               | : | Habli                                                     |
| 2.                     | Jenis Kelamin                      | : | Pria / <del>Perempuan</del>                               |
| 3.                     | Usia                               | : | 35                                                        |
| 4.                     | Alamat                             | : | Perpat                                                    |
| 5.                     | Pekerjaan                          | : | Petani lada dan pekebun karet                             |
| 6.                     | No Telepon                         | : | -                                                         |
| 7.                     | Pendidikan terakhir                | : | SD                                                        |
| 8.                     | Asal daerah                        | : | Penduduk asli                                             |
| 9.                     | Suku                               | : | Melayu Belitung                                           |
| 10.                    | Status dalam sistem kelola sunggau | : | Petani lebah/pemilik sunggau,<br>pemilik sambit, pengasap |



## Informed Consent

### *Kesediaan mengisi Kuesioner*

Jika saudara/i menyatakan BERSEDIA dengan sukarela untuk ikut serta dalam penelitian ini, maka Anda mendapatkan jaminan dari peneliti utama yaitu Suci Dian Hayati, bahwa identitas dan data yang Anda berikan hanya akan digunakan untuk keperluan penelitian dan tidak akan diberikan ke pihak siapapun, kapanpun, dan untuk kepentingan apapun.

Anda juga mendapat jaminan bahwa Anda bisa menarik diri dari penelitian ini kapan saja dan dengan demikian data Anda tidak akan dipakai. Jika saudara/i TIDAK BERSEDIA mengikuti penelitian ini, maka pengisian kuesioner tidak akan dilanjutkan.

Apakah Anda bersedia ikut serta dalam penelitian ini?

Ya/Tidak

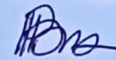

SARIF

Tanda tangan

.....

| A. Identitas Responden |                                    |   |                                                            |
|------------------------|------------------------------------|---|------------------------------------------------------------|
| 1.                     | Nama                               | : | Sarif                                                      |
| 2.                     | Jenis Kelamin                      | : | Pria / Perempuan                                           |
| 3.                     | Usia                               | : | 42                                                         |
| 4.                     | Alamat                             | : | Perpat                                                     |
| 5.                     | Pekerjaan                          | : | Petani lada                                                |
| 6.                     | No Telepon                         | : | -                                                          |
| 7.                     | Pendidikan terakhir                | : | SD                                                         |
| 8.                     | Asal daerah                        | : | Penduduk asli                                              |
| 9.                     | Suku                               | : | Melayu Belitung                                            |
| 10.                    | Status dalam sistem kelola sunggau | : | Petani lebah/pemilik sunggau,<br>pemilik sambit, pengasap. |



## Informed Consent

### *Kesediaan mengisi Kuesioner*

Jika saudara/i menyatakan BERSEDIA dengan sukarela untuk ikut serta dalam penelitian ini, maka Anda mendapatkan jaminan dari peneliti utama yaitu Suci Dian Hayati, bahwa identitas dan data yang Anda berikan hanya akan digunakan untuk keperluan penelitian dan tidak akan diberikan ke pihak siapapun, kapanpun, dan untuk kepentingan apapun.

Anda juga mendapat jaminan bahwa Anda bisa menarik diri dari penelitian ini kapan saja dan dengan demikian data Anda tidak akan dipakai. Jika saudara/i TIDAK BERSEDIA mengikuti penelitian ini, maka pengisian kuesioner tidak akan dilanjutkan.

Apakah Anda bersedia ikut serta dalam penelitian ini?

Tanda tangan

Ya/Tidak

*Sarpin*

.....S.A.R.P.I.N.....

| A. Identitas Responden |                                    |   |                                                        |
|------------------------|------------------------------------|---|--------------------------------------------------------|
| 1.                     | Nama                               | : | Sarpin                                                 |
| 2.                     | Jenis Kelamin                      | : | Pria / Perempuan                                       |
| 3.                     | Usia                               | : | 52                                                     |
| 4.                     | Alamat                             | : | Perpat                                                 |
| 5.                     | Pekerjaan                          | : | Petani lada, petani sawah dan pekebun karet            |
| 6.                     | No Telepon                         | : | -                                                      |
| 7.                     | Pendidikan terakhir                | : | SMP                                                    |
| 8.                     | Asal daerah                        | : | Penduduk asli                                          |
| 9.                     | Suku                               | : | Melayu Belitung                                        |
| 10.                    | Status dalam sistem kelola sunggau | : | Petani lebah/pemilik sunggau, pemilik sambit, pengasap |



## Informed Consent

### *Kesediaan mengisi Kuesioner*

Jika saudara/i menyatakan BERSEDIA dengan sukarela untuk ikut serta dalam penelitian ini, maka Anda mendapatkan jaminan dari peneliti utama yaitu Suci Dian Hayati, bahwa identitas dan data yang Anda berikan hanya akan digunakan untuk keperluan penelitian dan tidak akan diberikan ke pihak siapapun, kapanpun, dan untuk kepentingan apapun.

Anda juga mendapat jaminan bahwa Anda bisa menarik diri dari penelitian ini kapan saja dan dengan demikian data Anda tidak akan dipakai. Jika saudara/i TIDAK BERSEDIA mengikuti penelitian ini, maka pengisian kuesioner tidak akan dilanjutkan.

Apakah Anda bersedia ikut serta dalam penelitian ini?

Ya/Tidak

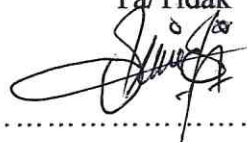

Tanda tangan

| A. Identitas Responden |                                    |   |                                                           |
|------------------------|------------------------------------|---|-----------------------------------------------------------|
| 1.                     | Nama                               | : | Saidi                                                     |
| 2.                     | Jenis Kelamin                      | : | Pria / Perempuan                                          |
| 3.                     | Usia                               | : | 47                                                        |
| 4.                     | Alamat                             | : | Kembiri                                                   |
| 5.                     | Pekerjaan                          | : | Petani lada dan pekebun sawit                             |
| 6.                     | No Telepon                         | : | 0831-4109-4473                                            |
| 7.                     | Pendidikan terakhir                | : | SMA                                                       |
| 8.                     | Asal daerah                        | : | Penduduk asli                                             |
| 9.                     | Suku                               | : | Melayu Belitung                                           |
| 10.                    | Status dalam sistem kelola sunggau | : | Petani lebah/pemilik sunggau,<br>pemilik sambit, pengasap |



## Informed Consent

### *Kesediaan mengisi Kuesioner*

Jika saudara/i menyatakan BERSEDIA dengan sukarela untuk ikut serta dalam penelitian ini, maka Anda mendapatkan jaminan dari peneliti utama yaitu Suci Dian Hayati, bahwa identitas dan data yang Anda berikan hanya akan digunakan untuk keperluan penelitian dan tidak akan diberikan ke pihak siapapun, kapanpun, dan untuk kepentingan apapun.

Anda juga mendapat jaminan bahwa Anda bisa menarik diri dari penelitian ini kapan saja dan dengan demikian data Anda tidak akan dipakai. Jika saudara/i TIDAK BERSEDIA mengikuti penelitian ini, maka pengisian kuesioner tidak akan dilanjutkan.

Apakah Anda bersedia ikut serta dalam penelitian ini?

Ya/Tidak

Tanda tangan

  
.....

| A. Identitas Responden |                                    |   |                                                           |
|------------------------|------------------------------------|---|-----------------------------------------------------------|
| 1.                     | Nama                               | : | Madi                                                      |
| 2.                     | Jenis Kelamin                      | : | Pria / <del>Perempuan</del>                               |
| 3.                     | Usia                               | : | 37                                                        |
| 4.                     | Alamat                             | : | Kembiri                                                   |
| 5.                     | Pekerjaan                          | : | Petani lada dan pekebun sawit                             |
| 6.                     | No Telepon                         | : | 0819-2978-3865                                            |
| 7.                     | Pendidikan terakhir                | : | SMA                                                       |
| 8.                     | Asal daerah                        | : | Penduduk asli                                             |
| 9.                     | Suku                               |   | Melayu Belitung                                           |
| 10.                    | Status dalam sistem kelola sunggau | : | Petani lebah/pemilik sunggau,<br>pengasap, pemilik sambit |



## Informed Consent

### *Kesediaan mengisi Kuesioner*

Jika saudara/i menyatakan BERSEDIA dengan sukarela untuk ikut serta dalam penelitian ini, maka Anda mendapatkan jaminan dari peneliti utama yaitu Suci Dian Hayati, bahwa identitas dan data yang Anda berikan hanya akan digunakan untuk keperluan penelitian dan tidak akan diberikan ke pihak siapapun, kapanpun, dan untuk kepentingan apapun.

Anda juga mendapat jaminan bahwa Anda bisa menarik diri dari penelitian ini kapan saja dan dengan demikian data Anda tidak akan dipakai. Jika saudara/i TIDAK BERSEDIA mengikuti penelitian ini, maka pengisian kuesioner tidak akan dilanjutkan.

Apakah Anda bersedia ikut serta dalam penelitian ini?

Ya/Tidak



Tanda tangan

.....

| A. Identitas Responden |                                    |   |                                                        |
|------------------------|------------------------------------|---|--------------------------------------------------------|
| 1.                     | Nama                               | : | Sar'ie                                                 |
| 2.                     | Jenis Kelamin                      | : | Pria / Perempuan                                       |
| 3.                     | Usia                               | : | 67                                                     |
| 4.                     | Alamat                             | : | Kembiri                                                |
| 5.                     | Pekerjaan                          | : | Petani lada dan pengrajin pandan hutan                 |
| 6.                     | No Telepon                         | : | 0819-4952-1779                                         |
| 7.                     | Pendidikan terakhir                | : | Tidak tamat SD                                         |
| 8.                     | Asal daerah                        | : | Penduduk asli                                          |
| 9.                     | Suku                               | : | Melayu Belitung                                        |
| 10.                    | Status dalam sistem kelola sunggau | : | Petani lebah/pemilik sunggau, pemilik sambit, pengasap |



## Informed Consent

### Kesediaan mengisi Kuesioner

Jika saudara/inyatakan BERSEDIA dengan suka rela untuk ikut serta dalam penelitian ini, maka Anda mendapatkan jaminan dari peneliti utama yaitu Suci Dian Hayati, bahwa identitas dan data yang Anda berikan hanya akan digunakan untuk keperluan penelitian dan tidak akan diberikan ke pihak siapapun, kapanpun, dan untuk kepentingan apapun.

Anda juga mendapat jaminan bahwa Anda bisa menarik diri dari penelitian ini kapan saja dan dengan demikian data Anda tidak akan dipakai. Jika saudara/i TIDAK BERSEDIA mengikuti penelitian ini, maka pengisian kuesioner tidak akan dilanjutkan.

Apakah Anda bersedia ikut serta dalam penelitian ini?

Ya/Tidak

Tanda tangan

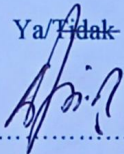  
.....

| A. Identitas Responden |                                |                                                              |
|------------------------|--------------------------------|--------------------------------------------------------------|
| 1.                     | Nama                           | : Elyanmar (Ayen)                                            |
| 2.                     | JenisKelamin                   | : Pria / Perempuan                                           |
| 3.                     | Usia                           | : 35 Tahun                                                   |
| 4.                     | Alamat                         | : Tanjung Rusa                                               |
| 5.                     | Pekerjaan                      | : Petani lada                                                |
| 6.                     | No Telepon                     | : 0878-7808-8055                                             |
| 7.                     | Pendidikanterakhir             | : S1 (Sarjana)                                               |
| 8.                     | Asaldaerah                     | : Penduduk asli                                              |
| 9.                     | Suku                           | Melayu Belitung                                              |
| 10.                    | Status dalamsistemkelolasunggu | : Petani lebah/pemilik sunggau,<br>pemilik sambit, pengasap. |



## Informed Consent

### Kesediaan mengisi Kuesioner

Jika saudara/inyatakan BERSEDIA dengan suka rela untuk ikut serta dalam penelitian ini, maka Anda mendapatkan jaminan dari peneliti utama yaitu Suci Dian Hayati, bahwa identitas dan data yang Anda berikan hanya akan digunakan untuk keperluan penelitian dan tidak akan diberikan ke pihak siapapun, kapanpun, dan untuk kepentingan apapun.

Anda juga mendapat jaminan bahwa Anda bisa menarik diri dari penelitian ini kapan saja dan dengan demikian data Anda tidak akan dipakai. Jika saudara/i TIDAK BERSEDIA mengikuti penelitian ini, maka pengisian kuesioner tidak akan dilanjutkan.

Apakah Anda bersedia ikut serta dalam penelitian ini?

Ya/Tidak

Tandatangan

SAHALI

| A. Identitas Responden |                                    |                                                          |
|------------------------|------------------------------------|----------------------------------------------------------|
| 1.                     | Nama                               | : Sahali                                                 |
| 2.                     | JenisKelamin                       | : Pria / Perempuan                                       |
| 3.                     | Usia                               | : 56 Tahun                                               |
| 4.                     | Alamat                             | : Tanjung Rusa                                           |
| 5.                     | Pekerjaan                          | : Petani lada                                            |
| 6.                     | No Telepon                         | : 081949468656                                           |
| 7.                     | Pendidikanterakhir                 | : SD                                                     |
| 8.                     | Asaldaerah                         | : Penduduk asli                                          |
| 9.                     | Suku                               | : Melayu Belitung                                        |
| 10.                    | Status dalam system kelola sunggau | : Petani lebah/pemilik sunggau, pemilik sambit, pengasap |



## Informed Consent

### Kesediaan mengisi Kuesioner

Jika saudara/inyatakan BERSEDIA dengan suka rela untuk ikut serta dalam penelitian ini, maka Anda mendapatkan jaminan dari peneliti utama yaitu Suci Dian Hayati, bahwa identitas dan data yang Anda berikan hanya akan digunakan untuk keperluan penelitian dan tidak akan diberikan ke pihak siapapun, kapanpun, dan untuk kepentingan apapun.

Anda juga mendapat jaminan bahwa Anda bisa menarik diri dari penelitian ini kapan saja dan dengan demikian data Anda tidak akan dipakai. Jika saudara/i TIDAK BERSEDIA mengikuti penelitian ini, maka pengisian kuesioner tidak akan dilanjutkan.

Apakah Anda bersedia ikut serta dalam penelitian ini?

Tandatangan

Ya/Tidak  
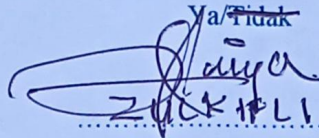  
ZULKIFLI

| A. Identitas Responden |                                    |   |                                                        |
|------------------------|------------------------------------|---|--------------------------------------------------------|
| 1.                     | Nama                               | : | Zulkifli                                               |
| 2.                     | JenisKelamin                       | : | Pria / Perempuan                                       |
| 3.                     | Usia                               | : | 51 Tahun                                               |
| 4.                     | Alamat                             | : | Tanjung Rusa                                           |
| 5.                     | Pekerjaan                          | : | Nelayan laut dan pembuat kapal nelayan                 |
| 6.                     | No Telepon                         | : | 081367255014                                           |
| 7.                     | Pendidikanterakhir                 | : | SD                                                     |
| 8.                     | Asaldaerah                         | : | Penduduk asli                                          |
| 9.                     | Suku                               | : | Melayu Belitung                                        |
| 10.                    | Status dalam system kelola sunggau | : | Petani lebah/pemilik sunggau, pengasap, pemilik sambit |



## Informed Consent

### Kesediaan mengisi Kuesioner

Jika saudara/inyatakan BERSEDIA dengan suka rela untuk ikut serta dalam penelitian ini, maka Anda mendapatkan jaminan dari peneliti utama yaitu Suci Dian Hayati, bahwa identitas dan data yang Anda berikan hanya akan digunakan untuk keperluan penelitian dan tidak akan diberikan ke pihak siapapun, kapanpun, dan untuk kepentingan apapun.

Anda juga mendapat jaminan bahwa Anda bisa menarik diri dari penelitian ini kapan saja dan dengan demikian data Anda tidak akan dipakai. Jika saudara/i TIDAK BERSEDIA mengikuti penelitian ini, maka pengisian kuesioner tidak akan dilanjutkan.

Apakah Anda bersedia ikut serta dalam penelitian ini?

Ya/Tidak

Tanda tangan

  
.....**ARYATNO**.....

| A. Identitas Responden |                                       |   |                                                           |
|------------------------|---------------------------------------|---|-----------------------------------------------------------|
| 1.                     | Nama                                  | : | Aryatno                                                   |
| 2.                     | Jenis Kelamin                         | : | Pria / Perempuan                                          |
| 3.                     | Usia                                  | : | 34 Tahun                                                  |
| 4.                     | Alamat                                | : | Tanjung Rusa                                              |
| 5.                     | Pekerjaan                             | : | Karyawan perkebunan kelapa sawit                          |
| 6.                     | No Telepon                            | : | 087748699636                                              |
| 7.                     | Pendidikan terakhir                   | : | Tidak Lulus SD                                            |
| 8.                     | Asal daerah                           | : | Penduduk asli                                             |
| 9.                     | Suku                                  | : | Melayu Belitung                                           |
| 10.                    | Status dalam system kelola<br>sunggau | : | Petani lebah/pemilik sunggau,<br>pemilik sambit, pengasap |



### **Informed Consent/ Kesediaan mengisi Kuesioner**

If you declare that you are willing to freely participate in this research, the main researcher, Suci Dian Hayati, will ensure that the identity and data you provide will be used only for research purposes and will not be given to anybody, at any time, and for any reason.

*Jika saudara/i menyatakan BERSEDIA dengan sukarela untuk ikut serta dalam penelitian ini, maka Anda mendapatkan jaminan dari peneliti utama yaitu Suci Dian Hayati, bahwa identitas dan data yang Anda berikan hanya akan digunakan untuk keperluan penelitian dan tidak akan diberikan ke pihak siapapun, kapanpun, dan untuk kepentingan apapun.*

You may also be assured that you can discontinue the research at any moment and that your data will not be used. **If you do not agree** to participate in this study, you will not be able to complete the questionnaire.

*Anda juga mendapat jaminan bahwa Anda bisa menarik diri dari penelitian ini kapan saja dan dengan demikian data Anda tidak akan dipakai. Jika saudara/i TIDAK BERSEDIA mengikuti penelitian ini, maka pengisian kuesioner tidak akan dilanjutkan.*

Are you willing to participate in this study?

Yes / No

*Apakah Anda bersedia ikut serta dalam penelitian ini?*

Ya/Tidak

Signed  
(Tanda tangan)

.....*Suci*.....

### **The questionnaire form**

| <b>A. Respondent identity (Identitas Responden)</b> |                              |                                                                          |
|-----------------------------------------------------|------------------------------|--------------------------------------------------------------------------|
| 1.                                                  | Name<br>Nama                 | : Serahi                                                                 |
| 2.                                                  | Gender<br>Jenis Kelamin      | : Male / <del>Female</del><br>(Pria / perempuan)                         |
| 3.                                                  | Age<br>Usia                  | : 56 tahun                                                               |
| 4.                                                  | Address<br>Alamat            | : Desa Kembiri                                                           |
| 5.                                                  | Contact number<br>No Telepon | :                                                                        |
| 6.                                                  | Citizens<br>Asal daerah      | : Native / <del>immigrants</del><br>Penduduk asli / <del>pendatang</del> |



### Informed Consent/ Kesediaan mengisi Kuesioner

If you declare that you are willing to freely participate in this research, the main researcher, Suci Dian Hayati, will ensure that the identity and data you provide will be used only for research purposes and will not be given to anybody, at any time, and for any reason.

*Jika saudara/i menyatakan BERSEDIA dengan sukarela untuk ikut serta dalam penelitian ini, maka Anda mendapatkan jaminan dari peneliti utama yaitu Suci Dian Hayati, bahwa identitas dan data yang Anda berikan hanya akan digunakan untuk keperluan penelitian dan tidak akan diberikan ke pihak siapapun, kapanpun, dan untuk kepentingan apapun.*

You may also be assured that you can discontinue the research at any moment and that your data will not be used. **If you do not agree** to participate in this study, you will not be able to complete the questionnaire.

*Anda juga mendapat jaminan bahwa Anda bisa menarik diri dari penelitian ini kapan saja dan dengan demikian data Anda tidak akan dipakai. Jika saudara/i TIDAK BERSEDIA mengikuti penelitian ini, maka pengisian kuesioner tidak akan dilanjutkan.*

Are you willing to participate in this study?

Yes / ~~No~~

*Apakah Anda bersedia ikut serta dalam penelitian ini?*

Ya/Tidak

Signed  
(Tanda tangan)

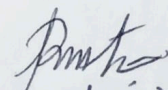  
.....(Ramdani).....

### The questionnaire form

| A. Respondent identity (Identitas Responden) |                              |                                                    |
|----------------------------------------------|------------------------------|----------------------------------------------------|
| 1.                                           | Name<br>Nama                 | : Ramdani                                          |
| 2.                                           | Gender<br>Jenis Kelamin      | : Male / Female<br>(Pria / perempuan)              |
| 3.                                           | Age<br>Usia                  | : 46 tahun                                         |
| 4.                                           | Address<br>Alamat            | : Desa Tanjung Rusa Kembiri                        |
| 5.                                           | Contact number<br>No Telepon | :                                                  |
| 6.                                           | Citizens<br>Asal daerah      | : Native / immigrants<br>Penduduk asli / pendatang |



### **Informed Consent/ Kesediaan mengisi Kuesioner**

If you declare that you are willing to freely participate in this research, the main researcher, Suci Dian Hayati, will ensure that the identity and data you provide will be used only for research purposes and will not be given to anybody, at any time, and for any reason.

*Jika saudara/i menyatakan BERSEDIA dengan sukarela untuk ikut serta dalam penelitian ini, maka Anda mendapatkan jaminan dari peneliti utama yaitu Suci Dian Hayati, bahwa identitas dan data yang Anda berikan hanya akan digunakan untuk keperluan penelitian dan tidak akan diberikan ke pihak siapapun, kapanpun, dan untuk kepentingan apapun.*

You may also be assured that you can discontinue the research at any moment and that your data will not be used. **If you do not agree** to participate in this study, you will not be able to complete the questionnaire.

*Anda juga mendapat jaminan bahwa Anda bisa menarik diri dari penelitian ini kapan saja dan dengan demikian data Anda tidak akan dipakai. Jika saudara/i TIDAK BERSEDIA mengikuti penelitian ini, maka pengisian kuesioner tidak akan dilanjutkan.*

Are you willing to participate in this study?

Yes / No

*Apakah Anda bersedia ikut serta dalam penelitian ini?*

Ya/Tidak

Signed  
(Tanda tangan)

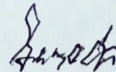

.....

### **The questionnaire form**

| <b>A. Respondent identity (Identitas Responden)</b> |                              |                                                    |
|-----------------------------------------------------|------------------------------|----------------------------------------------------|
| 1.                                                  | Name<br>Nama                 | : SARIP                                            |
| 2.                                                  | Gender<br>Jenis Kelamin      | : Male / Female<br>(Pria / perempuan)              |
| 3.                                                  | Age<br>Usia                  | : 50 tahun                                         |
| 4.                                                  | Address<br>Alamat            | : Desa Wangkang Rembiri                            |
| 5.                                                  | Contact number<br>No Telepon | :                                                  |
| 6.                                                  | Citizens<br>Asal daerah      | : Native / immigrants<br>Penduduk asli / pendatang |



### **Informed Consent/ Kesediaan mengisi Kuesioner**

If you declare that you are willing to freely participate in this research, the main researcher, Suci Dian Hayati, will ensure that the identity and data you provide will be used only for research purposes and will not be given to anybody, at any time, and for any reason.

*Jika saudara/i menyatakan BERSEDIA dengan sukarela untuk ikut serta dalam penelitian ini, maka Anda mendapatkan jaminan dari peneliti utama yaitu Suci Dian Hayati, bahwa identitas dan data yang Anda berikan hanya akan digunakan untuk keperluan penelitian dan tidak akan diberikan ke pihak siapapun, kapanpun, dan untuk kepentingan apapun.*

You may also be assured that you can discontinue the research at any moment and that your data will not be used. **If you do not agree** to participate in this study, you will not be able to complete the questionnaire.

*Anda juga mendapat jaminan bahwa Anda bisa menarik diri dari penelitian ini kapan saja dan dengan demikian data Anda tidak akan dipakai. Jika saudara/i TIDAK BERSEDIA mengikuti penelitian ini, maka pengisian kuesioner tidak akan dilanjutkan.*

Are you willing to participate in this study?

Yes / No

*Apakah Anda bersedia ikut serta dalam penelitian ini?*

Ya/Tidak

Signed  
(Tanda tangan)

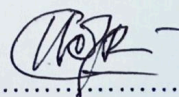  
.....

### **The questionnaire form**

| <b>A. Respondent identity (Identitas Responden)</b> |                              |                                                                          |
|-----------------------------------------------------|------------------------------|--------------------------------------------------------------------------|
| 1.                                                  | Name<br>Nama                 | : Asrun                                                                  |
| 2.                                                  | Gender<br>Jenis Kelamin      | : Male / <del>Female</del><br>(Pria / perempuan)                         |
| 3.                                                  | Age<br>Usia                  | : 47 tahun                                                               |
| 4.                                                  | Address<br>Alamat            | : Desa Kambri                                                            |
| 5.                                                  | Contact number<br>No Telepon | :                                                                        |
| 6.                                                  | Citizens<br>Asal daerah      | : Native / <del>immigrants</del><br>Penduduk asli / <del>pendatang</del> |



### **Informed Consent/ Kesediaan mengisi Kuesioner**

If you declare that you are willing to freely participate in this research, the main researcher, Suci Dian Hayati, will ensure that the identity and data you provide will be used only for research purposes and will not be given to anybody, at any time, and for any reason.

*Jika saudara/i menyatakan BERSEDIA dengan sukarela untuk ikut serta dalam penelitian ini, maka Anda mendapatkan jaminan dari peneliti utama yaitu Suci Dian Hayati, bahwa identitas dan data yang Anda berikan hanya akan digunakan untuk keperluan penelitian dan tidak akan diberikan ke pihak siapapun, kapanpun, dan untuk kepentingan apapun.*

You may also be assured that you can discontinue the research at any moment and that your data will not be used. **If you do not agree** to participate in this study, you will not be able to complete the questionnaire.

*Anda juga mendapat jaminan bahwa Anda bisa menarik diri dari penelitian ini kapan saja dan dengan demikian data Anda tidak akan dipakai. Jika saudara/i TIDAK BERSEDIA mengikuti penelitian ini, maka pengisian kuesioner tidak akan dilanjutkan.*

Are you willing to participate in this study?

Yes / No

*Apakah Anda bersedia ikut serta dalam penelitian ini?*

Ya/Tidak

Signed  
(Tanda tangan)

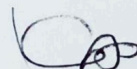

.....

### **The questionnaire form**

| <b>A. Respondent identity (Identitas Responden)</b> |                              |   |                                                                        |
|-----------------------------------------------------|------------------------------|---|------------------------------------------------------------------------|
| 1.                                                  | Name<br>Nama                 | : | Seradi                                                                 |
| 2.                                                  | Gender<br>Jenis Kelamin      | : | Male / <del>Female</del><br>(Pria / perempuan)                         |
| 3.                                                  | Age<br>Usia                  | : | 72 tahun                                                               |
| 4.                                                  | Address<br>Alamat            | : | Desa Kembiki                                                           |
| 5.                                                  | Contact number<br>No Telepon | : |                                                                        |
| 6.                                                  | Citizens<br>Asal daerah      | : | Native / <del>immigrants</del><br>Penduduk asli / <del>pendatang</del> |



### **Informed Consent/ Kesediaan mengisi Kuesioner**

If you declare that you are willing to freely participate in this research, the main researcher, Suci Dian Hayati, will ensure that the identity and data you provide will be used only for research purposes and will not be given to anybody, at any time, and for any reason.

*Jika saudara/i menyatakan BERSEDIA dengan sukarela untuk ikut serta dalam penelitian ini, maka Anda mendapatkan jaminan dari peneliti utama yaitu Suci Dian Hayati, bahwa identitas dan data yang Anda berikan hanya akan digunakan untuk keperluan penelitian dan tidak akan diberikan ke pihak siapapun, kapanpun, dan untuk kepentingan apapun.*

You may also be assured that you can discontinue the research at any moment and that your data will not be used. **If you do not agree** to participate in this study, you will not be able to complete the questionnaire.

*Anda juga mendapat jaminan bahwa Anda bisa menarik diri dari penelitian ini kapan saja dan dengan demikian data Anda tidak akan dipakai. Jika saudara/i TIDAK BERSEDIA mengikuti penelitian ini, maka pengisian kuesioner tidak akan dilanjutkan.*

Are you willing to participate in this study?

Yes / No

*Apakah Anda bersedia ikut serta dalam penelitian ini?*

Ya/Tidak

Signed  
(Tanda tangan)



.....

### **The questionnaire form**

| <b>A. Respondent identity (Identitas Responden)</b> |                              |                                                    |
|-----------------------------------------------------|------------------------------|----------------------------------------------------|
| 1.                                                  | Name<br>Nama                 | : SARIP                                            |
| 2.                                                  | Gender<br>Jenis Kelamin      | : Male / Female<br>(Pria / perempuan)              |
| 3.                                                  | Age<br>Usia                  | : 50 tahun                                         |
| 4.                                                  | Address<br>Alamat            | : Desa Wangkang Rembiri                            |
| 5.                                                  | Contact number<br>No Telepon | :                                                  |
| 6.                                                  | Citizens<br>Asal daerah      | : Native / immigrants<br>Penduduk asli / pendatang |



### Informed Consent/ Kesediaan mengisi Kuesioner

If you declare that you are willing to freely participate in this research, the main researcher, Suci Dian Hayati, will ensure that the identity and data you provide will be used only for research purposes and will not be given to anybody, at any time, and for any reason.

*Jika saudara/i menyatakan BERSEDIA dengan sukarela untuk ikut serta dalam penelitian ini, maka Anda mendapatkan jaminan dari peneliti utama yaitu Suci Dian Hayati, bahwa identitas dan data yang Anda berikan hanya akan digunakan untuk keperluan penelitian dan tidak akan diberikan ke pihak siapapun, kapanpun, dan untuk kepentingan apapun.*

You may also be assured that you can discontinue the research at any moment and that your data will not be used. **If you do not agree** to participate in this study, you will not be able to complete the questionnaire.

*Anda juga mendapat jaminan bahwa Anda bisa menarik diri dari penelitian ini kapan saja dan dengan demikian data Anda tidak akan dipakai. Jika saudara/i TIDAK BERSEDIA mengikuti penelitian ini, maka pengisian kuesioner tidak akan dilanjutkan.*

Are you willing to participate in this study?

Yes / No

*Apakah Anda bersedia ikut serta dalam penelitian ini?*

Ya/Tidak

Signed  
(Tanda tangan)

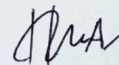

.....

### The questionnaire form

| A. Respondent identity (Identitas Responden) |                              |                                                    |
|----------------------------------------------|------------------------------|----------------------------------------------------|
| 1.                                           | Name<br>Nama                 | : Hariman                                          |
| 2.                                           | Gender<br>Jenis Kelamin      | : Male / <del>Female</del><br>(Pria / perempuan)   |
| 3.                                           | Age<br>Usia                  | : 23 tahun                                         |
| 4.                                           | Address<br>Alamat            | : Desa Kembiri                                     |
| 5.                                           | Contact number<br>No Telepon | :                                                  |
| 6.                                           | Citizens<br>Asal daerah      | : Native / immigrants<br>Penduduk asli / pendatang |



### **Informed Consent/ Kesediaan mengisi Kuesioner**

If you declare that you are willing to freely participate in this research, the main researcher, Suci Dian Hayati, will ensure that the identity and data you provide will be used only for research purposes and will not be given to anybody, at any time, and for any reason.

*Jika saudara/i menyatakan BERSEDIA dengan sukarela untuk ikut serta dalam penelitian ini, maka Anda mendapatkan jaminan dari peneliti utama yaitu Suci Dian Hayati, bahwa identitas dan data yang Anda berikan hanya akan digunakan untuk keperluan penelitian dan tidak akan diberikan ke pihak siapapun, kapanpun, dan untuk kepentingan apapun.*

You may also be assured that you can discontinue the research at any moment and that your data will not be used. **If you do not agree** to participate in this study, you will not be able to complete the questionnaire.

*Anda juga mendapat jaminan bahwa Anda bisa menarik diri dari penelitian ini kapan saja dan dengan demikian data Anda tidak akan dipakai. Jika saudara/i TIDAK BERSEDIA mengikuti penelitian ini, maka pengisian kuesioner tidak akan dilanjutkan.*

Are you willing to participate in this study?

Yes / No

*Apakah Anda bersedia ikut serta dalam penelitian ini?*

Ya/Tidak

Signed  
(Tanda tangan)

  
.....

### **The questionnaire form**

| <b>A. Respondent identity (Identitas Responden)</b> |                              |                                                    |
|-----------------------------------------------------|------------------------------|----------------------------------------------------|
| 1.                                                  | Name<br>Nama                 | : Masani                                           |
| 2.                                                  | Gender<br>Jenis Kelamin      | : Male / Female<br>(Pria / perempuan)              |
| 3.                                                  | Age<br>Usia                  | : 45 tahun                                         |
| 4.                                                  | Address<br>Alamat            | : Desa Kembiri                                     |
| 5.                                                  | Contact number<br>No Telepon | :                                                  |
| 6.                                                  | Citizens<br>Asal daerah      | : Native / immigrants<br>Penduduk asli / pendatang |



### Informed Consent/ Kesediaan mengisi Kuesioner

If you declare that you are willing to freely participate in this research, the main researcher, Suci Dian Hayati, will ensure that the identity and data you provide will be used only for research purposes and will not be given to anybody, at any time, and for any reason.

*Jika saudara/i menyatakan BERSEDIA dengan sukarela untuk ikut serta dalam penelitian ini, maka Anda mendapatkan jaminan dari peneliti utama yaitu Suci Dian Hayati, bahwa identitas dan data yang Anda berikan hanya akan digunakan untuk keperluan penelitian dan tidak akan diberikan ke pihak siapapun, kapanpun, dan untuk kepentingan apapun.*

You may also be assured that you can discontinue the research at any moment and that your data will not be used. **If you do not agree** to participate in this study, you will not be able to complete the questionnaire.

*Anda juga mendapat jaminan bahwa Anda bisa menarik diri dari penelitian ini kapan saja dan dengan demikian data Anda tidak akan dipakai. Jika saudara/i TIDAK BERSEDIA mengikuti penelitian ini, maka pengisian kuesioner tidak akan dilanjutkan.*

Are you willing to participate in this study?

Yes / No

*Apakah Anda bersedia ikut serta dalam penelitian ini?*

Ya/Tidak

Signed  
(Tanda tangan)

.....

### The questionnaire form

| A. Respondent identity (Identitas Responden) |                              |                                                                          |
|----------------------------------------------|------------------------------|--------------------------------------------------------------------------|
| 1.                                           | Name<br>Nama                 | : Saïd                                                                   |
| 2.                                           | Gender<br>Jenis Kelamin      | : Male / <del>Female</del><br>(Pria / perempuan)                         |
| 3.                                           | Age<br>Usia                  | : 45 tahun                                                               |
| 4.                                           | Address<br>Alamat            | : Desa <del>Thirgung</del> Kambiri                                       |
| 5.                                           | Contact number<br>No Telepon | :                                                                        |
| 6.                                           | Citizens<br>Asal daerah      | : Native / <del>immigrants</del><br>Penduduk asli / <del>pendatang</del> |



### Informed Consent/ Kesiediaan mengisi Kuesioner

If you declare that you are willing to freely participate in this research, the main researcher, Suci Dian Hayati, will ensure that the identity and data you provide will be used only for research purposes and will not be given to anybody, at any time, and for any reason.

*Jika saudara/i menyatakan BERSEDIA dengan sukarela untuk ikut serta dalam penelitian ini, maka Anda mendapatkan jaminan dari peneliti utama yaitu Suci Dian Hayati, bahwa identitas dan data yang Anda berikan hanya akan digunakan untuk keperluan penelitian dan tidak akan diberikan ke pihak siapapun, kapanpun, dan untuk kepentingan apapun.*

You may also be assured that you can discontinue the research at any moment and that your data will not be used. **If you do not agree** to participate in this study, you will not be able to complete the questionnaire.

*Anda juga mendapat jaminan bahwa Anda bisa menarik diri dari penelitian ini kapan saja dan dengan demikian data Anda tidak akan dipakai. Jika saudara/i TIDAK BERSEDIA mengikuti penelitian ini, maka pengisian kuesioner tidak akan dilanjutkan.*

Are you willing to participate in this study?

Yes / No

*Apakah Anda bersedia ikut serta dalam penelitian ini?*

Ya/Tidak

Signed  
(Tanda tangan)

.....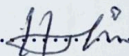.....

### The questionnaire form

| A. Respondent identity (Identitas Responden) |                              |                                                    |
|----------------------------------------------|------------------------------|----------------------------------------------------|
| 1.                                           | Name<br>Nama                 | : Turim                                            |
| 2.                                           | Gender<br>Jenis Kelamin      | : Male / <del>Female</del><br>(Pria / perempuan)   |
| 3.                                           | Age<br>Usia                  | : 51 tahun                                         |
| 4.                                           | Address<br>Alamat            | : Desa Mangrove Kuala Kembari                      |
| 5.                                           | Contact number<br>No Telepon | :                                                  |
| 6.                                           | Citizens<br>Asal daerah      | : Native / immigrants<br>Penduduk asli / pendatang |



### **Informed Consent/ Kesiediaan mengisi Kuesioner**

If you declare that you are willing to freely participate in this research, the main researcher, Suci Dian Hayati, will ensure that the identity and data you provide will be used only for research purposes and will not be given to anybody, at any time, and for any reason.

*Jika saudara/i menyatakan BERSEDIA dengan sukarela untuk ikut serta dalam penelitian ini, maka Anda mendapatkan jaminan dari peneliti utama yaitu Suci Dian Hayati, bahwa identitas dan data yang Anda berikan hanya akan digunakan untuk keperluan penelitian dan tidak akan diberikan ke pihak siapapun, kapanpun, dan untuk kepentingan apapun.*

You may also be assured that you can discontinue the research at any moment and that your data will not be used. **If you do not agree** to participate in this study, you will not be able to complete the questionnaire.

*Anda juga mendapat jaminan bahwa Anda bisa menarik diri dari penelitian ini kapan saja dan dengan demikian data Anda tidak akan dipakai. Jika saudara/i TIDAK BERSEDIA mengikuti penelitian ini, maka pengisian kuesioner tidak akan dilanjutkan.*

Are you willing to participate in this study?

Yes / No

*Apakah Anda bersedia ikut serta dalam penelitian ini?*

Ya/Tidak

Signed  
(Tanda tangan)

..... 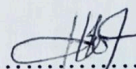

### **The questionnaire form**

| <b>A. Respondent identity (Identitas Responden)</b> |                              |                                                    |
|-----------------------------------------------------|------------------------------|----------------------------------------------------|
| 1.                                                  | Name<br>Nama                 | : Sawi                                             |
| 2.                                                  | Gender<br>Jenis Kelamin      | : Male / Female<br>(Pria / perempuan)              |
| 3.                                                  | Age<br>Usia                  | : 50 tahun                                         |
| 4.                                                  | Address<br>Alamat            | : Desa Mangrove Bantan Kembari                     |
| 5.                                                  | Contact number<br>No Telepon | :                                                  |
| 6.                                                  | Citizens<br>Asal daerah      | : Native / immigrants<br>Penduduk asli / pendatang |



### **Informed Consent/ Kesediaan mengisi Kuesioner**

If you declare that you are willing to freely participate in this research, the main researcher, Suci Dian Hayati, will ensure that the identity and data you provide will be used only for research purposes and will not be given to anybody, at any time, and for any reason.

*Jika saudara/i menyatakan BERSEDIA dengan sukarela untuk ikut serta dalam penelitian ini, maka Anda mendapatkan jaminan dari peneliti utama yaitu Suci Dian Hayati, bahwa identitas dan data yang Anda berikan hanya akan digunakan untuk keperluan penelitian dan tidak akan diberikan ke pihak siapapun, kapanpun, dan untuk kepentingan apapun.*

You may also be assured that you can discontinue the research at any moment and that your data will not be used. **If you do not agree** to participate in this study, you will not be able to complete the questionnaire.

*Anda juga mendapat jaminan bahwa Anda bisa menarik diri dari penelitian ini kapan saja dan dengan demikian data Anda tidak akan dipakai. Jika saudara/i TIDAK BERSEDIA mengikuti penelitian ini, maka pengisian kuesioner tidak akan dilanjutkan.*

Are you willing to participate in this study?

Yes / ~~No~~

*Apakah Anda bersedia ikut serta dalam penelitian ini?*

Ya/~~Tidak~~

Signed  
(Tanda tangan)

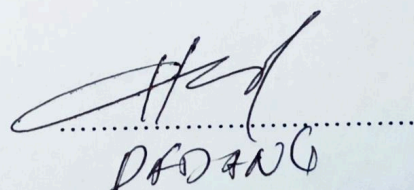

DADANG

### **The questionnaire form**

| <b>A. Respondent identity (Identitas Responden)</b> |                              |                                                    |
|-----------------------------------------------------|------------------------------|----------------------------------------------------|
| 1.                                                  | Name<br>Nama                 | : Dadang                                           |
| 2.                                                  | Gender<br>Jenis Kelamin      | : Male / Female<br>(Pria / perempuan)              |
| 3.                                                  | Age<br>Usia                  | : 40 Tahun                                         |
| 4.                                                  | Address<br>Alamat            | : Desa Perpat                                      |
| 5.                                                  | Contact number<br>No Telepon | :                                                  |
| 6.                                                  | Citizens<br>Asal daerah      | : Native / immigrants<br>Penduduk asli / pendatang |



### **Informed Consent/ Kesediaan mengisi Kuesioner**

If you declare that you are willing to freely participate in this research, the main researcher, Suci Dian Hayati, will ensure that the identity and data you provide will be used only for research purposes and will not be given to anybody, at any time, and for any reason.

*Jika saudara/i menyatakan BERSEDIA dengan sukarela untuk ikut serta dalam penelitian ini, maka Anda mendapatkan jaminan dari peneliti utama yaitu Suci Dian Hayati, bahwa identitas dan data yang Anda berikan hanya akan digunakan untuk keperluan penelitian dan tidak akan diberikan ke pihak siapapun, kapanpun, dan untuk kepentingan apapun.*

You may also be assured that you can discontinue the research at any moment and that your data will not be used. **If you do not agree** to participate in this study, you will not be able to complete the questionnaire.

*Anda juga mendapat jaminan bahwa Anda bisa menarik diri dari penelitian ini kapan saja dan dengan demikian data Anda tidak akan dipakai. Jika saudara/i TIDAK BERSEDIA mengikuti penelitian ini, maka pengisian kuesioner tidak akan dilanjutkan.*

Are you willing to participate in this study?

Yes / ~~No~~

*Apakah Anda bersedia ikut serta dalam penelitian ini?*

Ya / ~~Tidak~~

Signed  
(Tanda tangan)

.....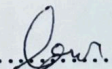.....

### **The questionnaire form**

| <b>A. Respondent identity (Identitas Responden)</b> |                              |   |                                                                        |
|-----------------------------------------------------|------------------------------|---|------------------------------------------------------------------------|
| 1.                                                  | Name<br>Nama                 | : | Sunan                                                                  |
| 2.                                                  | Gender<br>Jenis Kelamin      | : | Male / <del>Female</del><br>(Pria / perempuan)                         |
| 3.                                                  | Age<br>Usia                  | : | 45 tahun                                                               |
| 4.                                                  | Address<br>Alamat            | : | Desa Perpat.                                                           |
| 5.                                                  | Contact number<br>No Telepon | : | 0819.5812.0644.                                                        |
| 6.                                                  | Citizens<br>Asal daerah      | : | Native / <del>immigrants</del><br>Penduduk asli / <del>pendatang</del> |



### **Informed Consent/ Kesediaan mengisi Kuesioner**

If you declare that you are willing to freely participate in this research, the main researcher, Suci Dian Hayati, will ensure that the identity and data you provide will be used only for research purposes and will not be given to anybody, at any time, and for any reason.

*Jika saudara/i menyatakan BERSEDIA dengan sukarela untuk ikut serta dalam penelitian ini, maka Anda mendapatkan jaminan dari peneliti utama yaitu Suci Dian Hayati, bahwa identitas dan data yang Anda berikan hanya akan digunakan untuk keperluan penelitian dan tidak akan diberikan ke pihak siapapun, kapanpun, dan untuk kepentingan apapun.*

You may also be assured that you can discontinue the research at any moment and that your data will not be used. **If you do not agree** to participate in this study, you will not be able to complete the questionnaire.

*Anda juga mendapat jaminan bahwa Anda bisa menarik diri dari penelitian ini kapan saja dan dengan demikian data Anda tidak akan dipakai. Jika saudara/i TIDAK BERSEDIA mengikuti penelitian ini, maka pengisian kuesioner tidak akan dilanjutkan.*

Are you willing to participate in this study?

Yes / No

*Apakah Anda bersedia ikut serta dalam penelitian ini?*

Ya/Tidak

Signed  
(Tanda tangan)

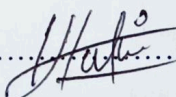

### **The questionnaire form**

| <b>A. Respondent identity (Identitas Responden)</b> |                                     |                                                               |
|-----------------------------------------------------|-------------------------------------|---------------------------------------------------------------|
| 1.                                                  | Name<br><i>Nama</i>                 | : Jah riman                                                   |
| 2.                                                  | Gender<br><i>Jenis Kelamin</i>      | : Male / Female<br>(Pria / <del>perempuan</del> )             |
| 3.                                                  | Age<br><i>Usia</i>                  | : 35                                                          |
| 4.                                                  | Address<br><i>Alamat</i>            | : PERPAT                                                      |
| 5.                                                  | Contact number<br><i>No Telepon</i> | :                                                             |
| 6.                                                  | Citizens<br><i>Asal daerah</i>      | : Native / immigrants<br>Penduduk asli / <del>pendatang</del> |



### **Informed Consent/ Kesiediaan mengisi Kuesioner**

If you declare that you are willing to freely participate in this research, the main researcher, Suci Dian Hayati, will ensure that the identity and data you provide will be used only for research purposes and will not be given to anybody, at any time, and for any reason.

*Jika saudara/i menyatakan BERSEDIA dengan sukarela untuk ikut serta dalam penelitian ini, maka Anda mendapatkan jaminan dari peneliti utama yaitu Suci Dian Hayati, bahwa identitas dan data yang Anda berikan hanya akan digunakan untuk keperluan penelitian dan tidak akan diberikan ke pihak siapapun, kapanpun, dan untuk kepentingan apapun.*

You may also be assured that you can discontinue the research at any moment and that your data will not be used. **If you do not agree** to participate in this study, you will not be able to complete the questionnaire.

*Anda juga mendapat jaminan bahwa Anda bisa menarik diri dari penelitian ini kapan saja dan dengan demikian data Anda tidak akan dipakai. Jika saudara/i TIDAK BERSEDIA mengikuti penelitian ini, maka pengisian kuesioner tidak akan dilanjutkan.*

Are you willing to participate in this study?

Yes / ~~No~~

*Apakah Anda bersedia ikut serta dalam penelitian ini?*

Ya / ~~Tidak~~

Signed  
(Tanda tangan)

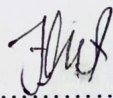  
.....

### **The questionnaire form**

| <b>A. Respondent identity (Identitas Responden)</b> |                              |                                                               |
|-----------------------------------------------------|------------------------------|---------------------------------------------------------------|
| 1.                                                  | Name<br>Nama                 | : Zudin .                                                     |
| 2.                                                  | Gender<br>Jenis Kelamin      | : Male / Female<br>(Pria / <del>perempuan</del> )             |
| 3.                                                  | Age<br>Usia                  | : 45                                                          |
| 4.                                                  | Address<br>Alamat            | : Per Pat                                                     |
| 5.                                                  | Contact number<br>No Telepon | :                                                             |
| 6.                                                  | Citizens<br>Asal daerah      | : Native / immigrants<br>Penduduk asli / <del>pendatang</del> |



### Informed Consent/ Kesediaan mengisi Kuesioner

If you declare that you are willing to freely participate in this research, the main researcher, Suci Dian Hayati, will ensure that the identity and data you provide will be used only for research purposes and will not be given to anybody, at any time, and for any reason.

*Jika saudara/i menyatakan BERSEDIA dengan sukarela untuk ikut serta dalam penelitian ini, maka Anda mendapatkan jaminan dari peneliti utama yaitu Suci Dian Hayati, bahwa identitas dan data yang Anda berikan hanya akan digunakan untuk keperluan penelitian dan tidak akan diberikan ke pihak siapapun, kapanpun, dan untuk kepentingan apapun.*

You may also be assured that you can discontinue the research at any moment and that your data will not be used. **If you do not agree** to participate in this study, you will not be able to complete the questionnaire.

*Anda juga mendapat jaminan bahwa Anda bisa menarik diri dari penelitian ini kapan saja dan dengan demikian data Anda tidak akan dipakai. Jika saudara/i TIDAK BERSEDIA mengikuti penelitian ini, maka pengisian kuesioner tidak akan dilanjutkan.*

Are you willing to participate in this study?

Yes / ~~No~~

*Apakah Anda bersedia ikut serta dalam penelitian ini?*

Ya / ~~Tidak~~

Signed  
(Tanda tangan)

.....  
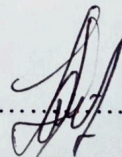

### The questionnaire form

| A. Respondent identity (Identitas Responden) |                              |                                                                          |
|----------------------------------------------|------------------------------|--------------------------------------------------------------------------|
| 1.                                           | Name<br>Nama                 | : Hariman                                                                |
| 2.                                           | Gender<br>Jenis Kelamin      | : Male / <del>Female</del><br>(Pria / perempuan)                         |
| 3.                                           | Age<br>Usia                  | : 43 tahun                                                               |
| 4.                                           | Address<br>Alamat            | : Desa <del>XXXXX</del> Perpat                                           |
| 5.                                           | Contact number<br>No Telepon | :                                                                        |
| 6.                                           | Citizens<br>Asal daerah      | : Native / <del>immigrants</del><br>Penduduk asli / <del>pendatang</del> |



### **Informed Consent/ Kesediaan mengisi Kuesioner**

If you declare that you are willing to freely participate in this research, the main researcher, Suci Dian Hayati, will ensure that the identity and data you provide will be used only for research purposes and will not be given to anybody, at any time, and for any reason.

*Jika saudara/i menyatakan BERSEDIA dengan sukarela untuk ikut serta dalam penelitian ini, maka Anda mendapatkan jaminan dari peneliti utama yaitu Suci Dian Hayati, bahwa identitas dan data yang Anda berikan hanya akan digunakan untuk keperluan penelitian dan tidak akan diberikan ke pihak siapapun, kapanpun, dan untuk kepentingan apapun.*

You may also be assured that you can discontinue the research at any moment and that your data will not be used. **If you do not agree** to participate in this study, you will not be able to complete the questionnaire.

*Anda juga mendapat jaminan bahwa Anda bisa menarik diri dari penelitian ini kapan saja dan dengan demikian data Anda tidak akan dipakai. Jika saudara/i TIDAK BERSEDIA mengikuti penelitian ini, maka pengisian kuesioner tidak akan dilanjutkan.*

Are you willing to participate in this study?

Yes / ~~No~~

*Apakah Anda bersedia ikut serta dalam penelitian ini?*

Ya / ~~Tidak~~

Signed  
(Tanda tangan)

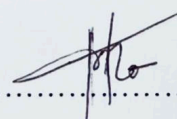  
.....

### **The questionnaire form**

| <b>A. Respondent identity (Identitas Responden)</b> |                              |   |                                                  |
|-----------------------------------------------------|------------------------------|---|--------------------------------------------------|
| 1.                                                  | Name<br>Nama                 | : | Marno                                            |
| 2.                                                  | Gender<br>Jenis Kelamin      | : | Male / Female<br>(Pria / perempuan)              |
| 3.                                                  | Age<br>Usia                  | : | 39                                               |
| 4.                                                  | Address<br>Alamat            | : | perpat JL Karang asem<br>RT 006 / RW 002         |
| 5.                                                  | Contact number<br>No Telepon | : | 0877 1340 2184                                   |
| 6.                                                  | Citizens<br>Asal daerah      | : | Native / immigrants<br>Penduduk asli / pendatang |



### **Informed Consent/ Kesiadaan mengisi Kuesioner**

If you declare that you are willing to freely participate in this research, the main researcher, Suci Dian Hayati, will ensure that the identity and data you provide will be used only for research purposes and will not be given to anybody, at any time, and for any reason.

*Jika saudara/i menyatakan BERSEDIA dengan sukarela untuk ikut serta dalam penelitian ini, maka Anda mendapatkan jaminan dari peneliti utama yaitu Suci Dian Hayati, bahwa identitas dan data yang Anda berikan hanya akan digunakan untuk keperluan penelitian dan tidak akan diberikan ke pihak siapapun, kapanpun, dan untuk kepentingan apapun.*

You may also be assured that you can discontinue the research at any moment and that your data will not be used. **If you do not agree** to participate in this study, you will not be able to complete the questionnaire.

*Anda juga mendapat jaminan bahwa Anda bisa menarik diri dari penelitian ini kapan saja dan dengan demikian data Anda tidak akan dipakai. Jika saudara/i TIDAK BERSEDIA mengikuti penelitian ini, maka pengisian kuesioner tidak akan dilanjutkan.*

Are you willing to participate in this study?

Yes / ~~No~~

*Apakah Anda bersedia ikut serta dalam penelitian ini?*

Ya/~~Tidak~~

Signed  
(Tanda tangan)

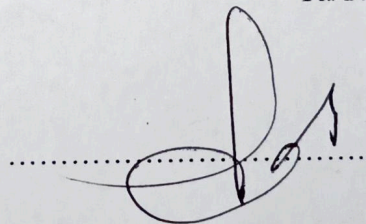

### **The questionnaire form**

| <b>A. Respondent identity (Identitas Responden)</b> |                                     |   |                                                  |
|-----------------------------------------------------|-------------------------------------|---|--------------------------------------------------|
| 1.                                                  | Name<br><i>Nama</i>                 | : | Alimin                                           |
| 2.                                                  | Gender<br><i>Jenis Kelamin</i>      | : | Male / Female<br>(Pria / perempuan)              |
| 3.                                                  | Age<br><i>Usia</i>                  | : | 64 tahun                                         |
| 4.                                                  | Address<br><i>Alamat</i>            | : | Desa Perpat                                      |
| 5.                                                  | Contact number<br><i>No Telepon</i> | : |                                                  |
| 6.                                                  | Citizens<br><i>Asal daerah</i>      | : | Native / immigrants<br>Penduduk asli / pendatang |



### **Informed Consent/ Kesiediaan mengisi Kuesioner**

If you declare that you are willing to freely participate in this research, the main researcher, Suci Dian Hayati, will ensure that the identity and data you provide will be used only for research purposes and will not be given to anybody, at any time, and for any reason.

*Jika saudara/i menyatakan BERSEDIA dengan sukarela untuk ikut serta dalam penelitian ini, maka Anda mendapatkan jaminan dari peneliti utama yaitu Suci Dian Hayati, bahwa identitas dan data yang Anda berikan hanya akan digunakan untuk keperluan penelitian dan tidak akan diberikan ke pihak siapapun, kapanpun, dan untuk kepentingan apapun.*

You may also be assured that you can discontinue the research at any moment and that your data will not be used. **If you do not agree** to participate in this study, you will not be able to complete the questionnaire.

*Anda juga mendapat jaminan bahwa Anda bisa menarik diri dari penelitian ini kapan saja dan dengan demikian data Anda tidak akan dipakai. Jika saudara/i TIDAK BERSEDIA mengikuti penelitian ini, maka pengisian kuesioner tidak akan dilanjutkan.*

Are you willing to participate in this study?

Yes / ~~No~~

*Apakah Anda bersedia ikut serta dalam penelitian ini?*

*Ya/Tidak*

Signed  
(Tanda tangan)

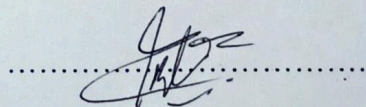

### **The questionnaire form**

| <b>A. Respondent identity (Identitas Responden)</b> |                                     |                                                                          |
|-----------------------------------------------------|-------------------------------------|--------------------------------------------------------------------------|
| 1.                                                  | Name<br><i>Nama</i>                 | : Welli                                                                  |
| 2.                                                  | Gender<br><i>Jenis Kelamin</i>      | : Male / <del>Female</del><br>(Pria / perempuan)                         |
| 3.                                                  | Age<br><i>Usia</i>                  | : 33 tahun                                                               |
| 4.                                                  | Address<br><i>Alamat</i>            | : Desa Tanjung Rusu                                                      |
| 5.                                                  | Contact number<br><i>No Telepon</i> | : 0838 . 2745 . 0825 .                                                   |
| 6.                                                  | Citizens<br><i>Asal daerah</i>      | : Native / <del>immigrants</del><br>Penduduk asli / <del>pendatang</del> |



### **Informed Consent/ Kesediaan mengisi Kuesioner**

If you declare that you are willing to freely participate in this research, the main researcher, Suci Dian Hayati, will ensure that the identity and data you provide will be used only for research purposes and will not be given to anybody, at any time, and for any reason.

*Jika saudara/i menyatakan BERSEDIA dengan sukarela untuk ikut serta dalam penelitian ini, maka Anda mendapatkan jaminan dari peneliti utama yaitu Suci Dian Hayati, bahwa identitas dan data yang Anda berikan hanya akan digunakan untuk keperluan penelitian dan tidak akan diberikan ke pihak siapapun, kapanpun, dan untuk kepentingan apapun.*

You may also be assured that you can discontinue the research at any moment and that your data will not be used. **If you do not agree** to participate in this study, you will not be able to complete the questionnaire.

*Anda juga mendapat jaminan bahwa Anda bisa menarik diri dari penelitian ini kapan saja dan dengan demikian data Anda tidak akan dipakai. Jika saudara/i TIDAK BERSEDIA mengikuti penelitian ini, maka pengisian kuesioner tidak akan dilanjutkan.*

Are you willing to participate in this study?

Yes / No

*Apakah Anda bersedia ikut serta dalam penelitian ini?*

Ya/Tidak

Signed  
(Tanda tangan)

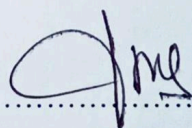

.....

### **The questionnaire form**

| <b>A. Respondent identity (Identitas Responden)</b> |                                     |                                                    |
|-----------------------------------------------------|-------------------------------------|----------------------------------------------------|
| 1.                                                  | Name<br><i>Nama</i>                 | : Masri                                            |
| 2.                                                  | Gender<br><i>Jenis Kelamin</i>      | : Male / Female<br>(Pria / perempuan)              |
| 3.                                                  | Age<br><i>Usia</i>                  | :                                                  |
| 4.                                                  | Address<br><i>Alamat</i>            | : Dusun Sabung, Ds. Tanjung Rusa                   |
| 5.                                                  | Contact number<br><i>No Telepon</i> | :                                                  |
| 6.                                                  | Citizens<br><i>Asal daerah</i>      | : Native / immigrants<br>Penduduk asli / pendatang |



### **Informed Consent/ Kesediaan mengisi Kuesioner**

If you declare that you are willing to freely participate in this research, the main researcher, Suci Dian Hayati, will ensure that the identity and data you provide will be used only for research purposes and will not be given to anybody, at any time, and for any reason.

*Jika saudara/i menyatakan BERSEDIA dengan sukarela untuk ikut serta dalam penelitian ini, maka Anda mendapatkan jaminan dari peneliti utama yaitu Suci Dian Hayati, bahwa identitas dan data yang Anda berikan hanya akan digunakan untuk keperluan penelitian dan tidak akan diberikan ke pihak siapapun, kapanpun, dan untuk kepentingan apapun.*

You may also be assured that you can discontinue the research at any moment and that your data will not be used. **If you do not agree** to participate in this study, you will not be able to complete the questionnaire.

*Anda juga mendapat jaminan bahwa Anda bisa menarik diri dari penelitian ini kapan saja dan dengan demikian data Anda tidak akan dipakai. Jika saudara/i TIDAK BERSEDIA mengikuti penelitian ini, maka pengisian kuesioner tidak akan dilanjutkan.*

Are you willing to participate in this study?

Yes / No

*Apakah Anda bersedia ikut serta dalam penelitian ini?*

Ya/Tidak

Signed  
(Tanda tangan)

.....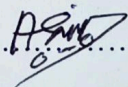

### **The questionnaire form**

| <b>A. Respondent identity (Identitas Responden)</b> |                                     |                                                    |
|-----------------------------------------------------|-------------------------------------|----------------------------------------------------|
| 1.                                                  | Name<br><i>Nama</i>                 | : Asmiran                                          |
| 2.                                                  | Gender<br><i>Jenis Kelamin</i>      | : Male / Female<br>(Pria / perempuan)              |
| 3.                                                  | Age<br><i>Usia</i>                  | :                                                  |
| 4.                                                  | Address<br><i>Alamat</i>            | : Dusun Sabung, Ds. Tanjung Rusa.                  |
| 5.                                                  | Contact number<br><i>No Telepon</i> | :                                                  |
| 6.                                                  | Citizens<br><i>Asal daerah</i>      | : Native / immigrants<br>Penduduk asli / pendatang |







### **Informed Consent/ Kesiediaan mengisi Kuesioner**

If you declare that you are willing to freely participate in this research, the main researcher, Suci Dian Hayati, will ensure that the identity and data you provide will be used only for research purposes and will not be given to anybody, at any time, and for any reason.

*Jika saudara/i menyatakan BERSEDIA dengan sukarela untuk ikut serta dalam penelitian ini, maka Anda mendapatkan jaminan dari peneliti utama yaitu Suci Dian Hayati, bahwa identitas dan data yang Anda berikan hanya akan digunakan untuk keperluan penelitian dan tidak akan diberikan ke pihak siapapun, kapanpun, dan untuk kepentingan apapun.*

You may also be assured that you can discontinue the research at any moment and that your data will not be used. **If you do not agree** to participate in this study, you will not be able to complete the questionnaire.

*Anda juga mendapat jaminan bahwa Anda bisa menarik diri dari penelitian ini kapan saja dan dengan demikian data Anda tidak akan dipakai. Jika saudara/i TIDAK BERSEDIA mengikuti penelitian ini, maka pengisian kuesioner tidak akan dilanjutkan.*

Are you willing to participate in this study?

Yes / No

*Apakah Anda bersedia ikut serta dalam penelitian ini?*

Ya/Tidak

Signed  
(Tanda tangan)

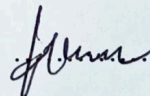 .....

### **The questionnaire form**

| <b>A. Respondent identity (Identitas Responden)</b> |                                     |   |                                                  |
|-----------------------------------------------------|-------------------------------------|---|--------------------------------------------------|
| 1.                                                  | Name<br><i>Nama</i>                 | : | Kurniawan                                        |
| 2.                                                  | Gender<br><i>Jenis Kelamin</i>      | : | Male / Female<br>(Pria / perempuan)              |
| 3.                                                  | Age<br><i>Usia</i>                  | : |                                                  |
| 4.                                                  | Address<br><i>Alamat</i>            | : | Dusun Sabung, Ds. Tanjung Rusa                   |
| 5.                                                  | Contact number<br><i>No Telepon</i> | : |                                                  |
| 6.                                                  | Citizens<br><i>Asal daerah</i>      | : | Native / immigrants<br>Penduduk asli / pendatang |



### **Informed Consent/ Kesediaan mengisi Kuesioner**

If you declare that you are willing to freely participate in this research, the main researcher, Suci Dian Hayati, will ensure that the identity and data you provide will be used only for research purposes and will not be given to anybody, at any time, and for any reason.

*Jika saudara/i menyatakan BERSEDIA dengan sukarela untuk ikut serta dalam penelitian ini, maka Anda mendapatkan jaminan dari peneliti utama yaitu Suci Dian Hayati, bahwa identitas dan data yang Anda berikan hanya akan digunakan untuk keperluan penelitian dan tidak akan diberikan ke pihak siapapun, kapanpun, dan untuk kepentingan apapun.*

You may also be assured that you can discontinue the research at any moment and that your data will not be used. **If you do not agree** to participate in this study, you will not be able to complete the questionnaire.

*Anda juga mendapat jaminan bahwa Anda bisa menarik diri dari penelitian ini kapan saja dan dengan demikian data Anda tidak akan dipakai. Jika saudara/i TIDAK BERSEDIA mengikuti penelitian ini, maka pengisian kuesioner tidak akan dilanjutkan.*

Are you willing to participate in this study?

Yes / No

*Apakah Anda bersedia ikut serta dalam penelitian ini?*

Ya/Tidak

Signed  
(Tanda tangan)

.....

### **The questionnaire form**

| <b>A. Respondent identity (Identitas Responden)</b> |                                     |                                                    |
|-----------------------------------------------------|-------------------------------------|----------------------------------------------------|
| 1.                                                  | Name<br><i>Nama</i>                 | : Rebo'i                                           |
| 2.                                                  | Gender<br><i>Jenis Kelamin</i>      | : Male / Female<br>(Pria / perempuan)              |
| 3.                                                  | Age<br><i>Usia</i>                  | :                                                  |
| 4.                                                  | Address<br><i>Alamat</i>            | : Dusun Sabung, Desa Tanjung Rusa                  |
| 5.                                                  | Contact number<br><i>No Telepon</i> | :                                                  |
| 6.                                                  | Citizens<br><i>Asal daerah</i>      | : Native / immigrants<br>Penduduk asli / pendatang |



### **Informed Consent/ Kesiediaan mengisi Kuesioner**

If you declare that you are willing to freely participate in this research, the main researcher, Suci Dian Hayati, will ensure that the identity and data you provide will be used only for research purposes and will not be given to anybody, at any time, and for any reason.

*Jika saudara/i menyatakan BERSEDIA dengan sukarela untuk ikut serta dalam penelitian ini, maka Anda mendapatkan jaminan dari peneliti utama yaitu Suci Dian Hayati, bahwa identitas dan data yang Anda berikan hanya akan digunakan untuk keperluan penelitian dan tidak akan diberikan ke pihak siapapun, kapanpun, dan untuk kepentingan apapun.*

You may also be assured that you can discontinue the research at any moment and that your data will not be used. **If you do not agree** to participate in this study, you will not be able to complete the questionnaire.

*Anda juga mendapat jaminan bahwa Anda bisa menarik diri dari penelitian ini kapan saja dan dengan demikian data Anda tidak akan dipakai. Jika saudara/i TIDAK BERSEDIA mengikuti penelitian ini, maka pengisian kuesioner tidak akan dilanjutkan.*

Are you willing to participate in this study?

Yes / No

*Apakah Anda bersedia ikut serta dalam penelitian ini?*

Ya/Tidak

Signed  
(Tanda tangan)

.....

### **The questionnaire form**

| <b>A. Respondent identity (Identitas Responden)</b> |                                     |                                                    |
|-----------------------------------------------------|-------------------------------------|----------------------------------------------------|
| 1.                                                  | Name<br><i>Nama</i>                 | : Suhaidi                                          |
| 2.                                                  | Gender<br><i>Jenis Kelamin</i>      | : Male / Female<br>(Pria / perempuan)              |
| 3.                                                  | Age<br><i>Usia</i>                  | :                                                  |
| 4.                                                  | Address<br><i>Alamat</i>            | : Dusun Sabung, Ds. Tanjung Rusa                   |
| 5.                                                  | Contact number<br><i>No Telepon</i> | :                                                  |
| 6.                                                  | Citizens<br><i>Asal daerah</i>      | : Native / immigrants<br>Penduduk asli / pendatang |



### **Informed Consent/ Kesediaan mengisi Kuesioner**

If you declare that you are willing to freely participate in this research, the main researcher, Suci Dian Hayati, will ensure that the identity and data you provide will be used only for research purposes and will not be given to anybody, at any time, and for any reason.

*Jika saudara/i menyatakan BERSEDIA dengan sukarela untuk ikut serta dalam penelitian ini, maka Anda mendapatkan jaminan dari peneliti utama yaitu Suci Dian Hayati, bahwa identitas dan data yang Anda berikan hanya akan digunakan untuk keperluan penelitian dan tidak akan diberikan ke pihak siapapun, kapanpun, dan untuk kepentingan apapun.*

You may also be assured that you can discontinue the research at any moment and that your data will not be used. **If you do not agree** to participate in this study, you will not be able to complete the questionnaire.

*Anda juga mendapat jaminan bahwa Anda bisa menarik diri dari penelitian ini kapan saja dan dengan demikian data Anda tidak akan dipakai. Jika saudara/i TIDAK BERSEDIA mengikuti penelitian ini, maka pengisian kuesioner tidak akan dilanjutkan.*

Are you willing to participate in this study?

Yes / No

*Apakah Anda bersedia ikut serta dalam penelitian ini?*

Ya/Tidak

Signed  
(Tanda tangan)

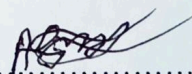  
.....

### **The questionnaire form**

| <b>A. Respondent identity (Identitas Responden)</b> |                                     |                                                    |
|-----------------------------------------------------|-------------------------------------|----------------------------------------------------|
| 1.                                                  | Name<br><i>Nama</i>                 | : Asmad                                            |
| 2.                                                  | Gender<br><i>Jenis Kelamin</i>      | : Male / Female<br>(Pria / perempuan)              |
| 3.                                                  | Age<br><i>Usia</i>                  | :                                                  |
| 4.                                                  | Address<br><i>Alamat</i>            | : Dusun Sabung, Desa Tanjung Rusa.                 |
| 5.                                                  | Contact number<br><i>No Telepon</i> | :                                                  |
| 6.                                                  | Citizens<br><i>Asal daerah</i>      | : Native / immigrants<br>Penduduk asli / pendatang |



### Informed Consent/ Kesediaan mengisi Kuesioner

If you declare that you are willing to freely participate in this research, the main researcher, Suci Dian Hayati, will ensure that the identity and data you provide will be used only for research purposes and will not be given to anybody, at any time, and for any reason.

*Jika saudara/i menyatakan BERSEDIA dengan sukarela untuk ikut serta dalam penelitian ini, maka Anda mendapatkan jaminan dari peneliti utama yaitu Suci Dian Hayati, bahwa identitas dan data yang Anda berikan hanya akan digunakan untuk keperluan penelitian dan tidak akan diberikan ke pihak siapapun, kapanpun, dan untuk kepentingan apapun.*

You may also be assured that you can discontinue the research at any moment and that your data will not be used. **If you do not agree** to participate in this study, you will not be able to complete the questionnaire.

*Anda juga mendapat jaminan bahwa Anda bisa menarik diri dari penelitian ini kapan saja dan dengan demikian data Anda tidak akan dipakai. Jika saudara/i TIDAK BERSEDIA mengikuti penelitian ini, maka pengisian kuesioner tidak akan dilanjutkan.*

Are you willing to participate in this study?

Yes / No

*Apakah Anda bersedia ikut serta dalam penelitian ini?*

Ya/Tidak

Signed  
(Tanda tangan)

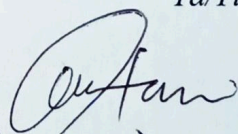  
.....C. tarman.....

### The questionnaire form

| A. Respondent identity (Identitas Responden) |                              |                                                    |
|----------------------------------------------|------------------------------|----------------------------------------------------|
| 1.                                           | Name<br>Nama                 | : Tarman                                           |
| 2.                                           | Gender<br>Jenis Kelamin      | : Male / <del>Female</del><br>(Pria / perempuan)   |
| 3.                                           | Age<br>Usia                  | : 42 tahun                                         |
| 4.                                           | Address<br>Alamat            | : Desa Tanjung Rusa                                |
| 5.                                           | Contact number<br>No Telepon | : 0819.4956 8351                                   |
| 6.                                           | Citizens<br>Asal daerah      | : Native / immigrants<br>Penduduk asli / pendatang |
